# Supplementary material for: Metal-free, visible-light driven α-C(sp3)–H gem-difluoroallylation of glycine derivatives with trifluoromethyl alkenes and 1,3-enynes
Source: Royal Society of Chemistry journal article supplement (doi:10.1039/d3gc01750h), 2023-01-01

## Supporting Information

### Metal-free, visible-light driven $\alpha$ -C(sp<sup>3</sup>)-H *gem*-difluoroallylation of glycine derivatives with trifluoromethyl alkenes and 1,3-enynes

Zi-Hang Yuan<sup>a</sup>, Hong Xin<sup>a</sup>, Lu Zhang<sup>a</sup>, Pin Gao<sup>a</sup>, Xu Yang<sup>b</sup>, Xin-Hua Duan<sup>a,b</sup> and Li-Na Guo<sup>a\*</sup>

<sup>a</sup>*Department of Chemistry, School of Chemistry, Xi'an Key Laboratory of Sustainable Energy  
Material Chemistry and Engineering Research Center of Energy Storage Materials and Devices,  
Ministry of Education, Xi'an Jiaotong University, Xi'an 710049, China.*

<sup>b</sup>*School of Electrical Engineering, Xi'an Jiaotong University, Xi'an, 710049, P. R. China*

#### Table of Contents

|                                                                                                       |     |
|-------------------------------------------------------------------------------------------------------|-----|
| 1. General Information                                                                                | S2  |
| 2. Starting Materials                                                                                 | S3  |
| 3. Optimization of Reaction condition                                                                 | S6  |
| 4. Representative Procedure for the Glycine Derivatives 1 with Trifluoromethyl Alkenes 2 or 4         | S11 |
| 5. Large Scale Synthesis of 3a and 5a                                                                 | S12 |
| 6. Derivatizations of Products                                                                        | S12 |
| 7. Compatibility with Biomolecules                                                                    | S15 |
| 8. Mechanism Studies                                                                                  | S16 |
| 9. References                                                                                         | S20 |
| 10. Characterization of Products                                                                      | S21 |
| 11. <sup>1</sup> H NMR, <sup>19</sup> F NMR and <sup>13</sup> C NMR Spectra of Products 3 and 5 - 11. | S41 |

## 1. General Information

All reactions were conducted in 10 mL oven-dried sealed tube under N<sub>2</sub> atmosphere. Unless otherwise stated, all reagents were purchased from commercial sources and used without further purification. <sup>1</sup>H, <sup>19</sup>F and <sup>13</sup>C NMR spectra were recorded on a Bruker 400 MHz (100 MHz for <sup>13</sup>C NMR) spectrometer at ambient temperature. Chemical shift are reported in ppm from TMS with the solvent resonance as internal standard (CDCl<sub>3</sub>: <sup>1</sup>H NMR:  $\delta$  = 7.26; <sup>13</sup>C NMR:  $\delta$  = 77.16; CFC<sub>3</sub> as an external standard and low field is positive). Coupling constants are reported in Hz with multiplicities denoted as s (singlet), d (doublet), t (triplet), q (quartet), dd (doublet of doublets) and m (multiplet). FT-IR spectra were recorded on a Bruker V 70 spectrometer and only major peaks are reported in cm<sup>-1</sup>. HRMS were obtained on a WATERS I-Class VION IMS Q-Tof. Melting points were measured using open glass capillaries in a SGW® X-4A apparatus. Analytical TLC: aluminum backed plates pre-coated (0.25 mm) with Merck Silica Gel 60F-254. Compounds were visualized by exposure to UV-light or by dipping the plates in KMnO<sub>4</sub> stain followed by heating.

## 2. Starting Materials

### 2.1 Preparation of Glycine Derivatives 1

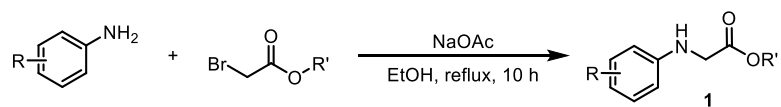

Following the literature procedure:<sup>1</sup> a mixture of aniline (10 mmol), bromide acetate (1.2 equiv) and anhydrous sodium acetate (2.0 equiv) in 30 mL of ethanol was refluxed for 10 h (heating mantle). The mixture was then cooled down to the room temperature and filtered through celite. The celite was washed with DCM, the combined organic layer was evaporated to remove the solvent and the crude product was then purified by column chromatography (PE/EA = 10:1 to 1:1). The pure product was obtained as solid or liquid.

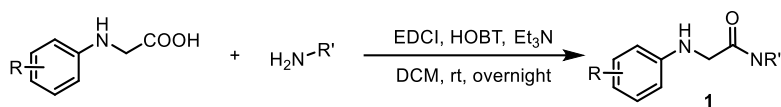

Following the literature procedure:<sup>1</sup> to a 100 mL round-bottom flask, *N*-aryl glycines (10.0 mmol) and corresponding amines (10.0 mmol) were dissolved in 30 mL DCM, EDCI (16.0 mmol) HOBT (14.5 mmol) and Et<sub>3</sub>N (20.0 mmol) were added. The reaction mixture stirred overnight. Subsequently, water was added to the roundbottom flask. The resulting mixture was extracted with DCM (three times), and the combined organic layers were dried over Na<sub>2</sub>SO<sub>4</sub> and concentrated in vacuo. The residue was purified by column chromatography (PE/EA = 4:1 to 1:1). The pure product was obtained.

### 2.2 Preparation of Trifluoromethylalkenes 2

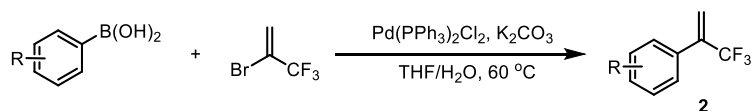

Following the literature procedure,<sup>2</sup> to an oven-dried 100 mL two-neck round bottom flask equipped with a stirring bar and a condenser was charged with arylboronic acid (3.0 mmol, 1.0 equiv), K<sub>2</sub>CO<sub>3</sub> (12.0 mmol, 4.0 equiv), and Pd(PPh<sub>3</sub>)<sub>2</sub>Cl<sub>2</sub> (0.03 mmol, 1.0 mol%). The flask was purged with nitrogen three times. A mixture of degassed THF (10 mL) and H<sub>2</sub>O (7 mL) were added via syringe, followed by 2-bromo-3,3,3-trifluoroprop-1-ene (6.0 mmol, 2.0 equiv). The reaction mixture was heated to 60 °C and stirred for 24 h. Then the reaction mixture was cooled to room temperature and diluted with diethyl ether (25 mL) and H<sub>2</sub>O (25 mL). The layers were

separated, and the aqueous layer was extracted with Et<sub>2</sub>O (2 × 25 mL). The combined organic layers were washed with H<sub>2</sub>O (25 mL), brine (25 mL), dried over Na<sub>2</sub>SO<sub>4</sub>, and concentrated under reduced pressure. The crude residue was purified by column chromatography on silica gel (petroleum ether/ethyl acetate = 20 : 1) to afford trifluoromethylalkenes **2**. All the spectra data are in agreement with the literature.

### 2.3 The preparation of 2-Trifluoromethyl-1, 3-Enynes **4**

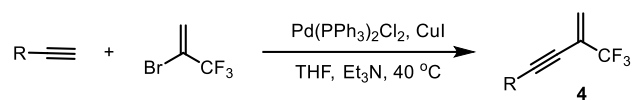

A Schlenk flask was charged with Pd(PPh<sub>3</sub>)<sub>2</sub>Cl<sub>2</sub> (2 mol %) and CuI (5 mol %) under N<sub>2</sub> atmosphere. Dry triethylamine and 2-bromo-3,3,3-trifluoro-1-propene (1.2 equiv) were added subsequently followed by dropwise addition of phenylacetylene (1.0 equiv). The reaction mixture was stirred at 40 °C until completion. The reaction was then quenched with saturated NH<sub>4</sub>Cl solution and extracted with pentane. Combined extracts were dried over Na<sub>2</sub>SO<sub>4</sub> and solvent was removed under vacuum. The residue was purified by column chromatography to afford the corresponding enyne.

Compounds **1**<sup>1</sup>, **2**<sup>2</sup> and **4**<sup>3</sup> were prepared according to the literatures.

### 3 Optimization of Reaction conditions

#### 3.1 General Procedure for the Reaction of ethyl *N*-phenylglycinate **1a** with Trifluoromethyl alkene **2a**

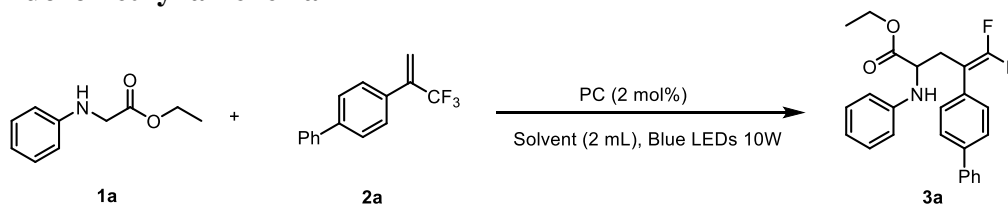

To a 10 mL oven-dried Schlenk-tube equipped with a magnetic stirrer was charged with glycine derivatives **1a** (0.20 mmol, 1.0 equiv.) and photocatalyst. Then, the tube was evacuated and backfilled with nitrogen (three times). Subsequently, a solution of trifluoromethyl alkenes **2a** (0.20 mmol, 1.0 equiv.) in solvent (2 mL) was added by a syringe. The reaction mixture was stirred under the irradiation of a 10 W Blue LEDs ( $\lambda = 460\text{--}470$  nm; distance app. 1.0 cm from the bulb) for a specified time. After that, the resulting mixture was quenched with H<sub>2</sub>O and extracted with EtOAc (3 x 10 mL). The combined organic phase was washed with brine (10 mL), dried over Na<sub>2</sub>SO<sub>4</sub>, and concentrated in vacuo. Purification of the crude product by flash chromatography on silica gel (petroleum ether/EtOAc: 30:1 to 2:1) furnishes the corresponding products **3a**.

### 3.2 Optimization of the Reaction 1a, 2a

*Solvent*

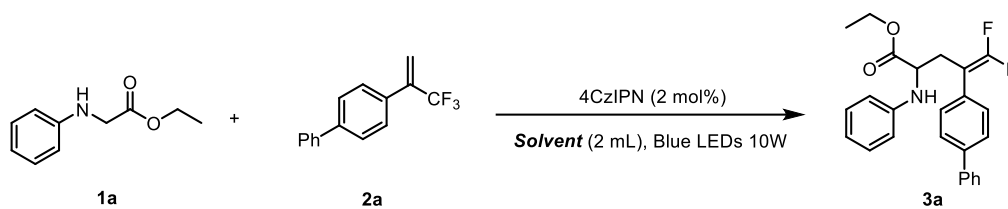

| Entry | Solvent | Yields (%) <sup>a</sup> |
|-------|---------|-------------------------|
| 1     | DMSO    | 35                      |
| 2     | DMF     | 21                      |
| 3     | DMAc    | trace                   |
| 4     | NMP     | trace                   |
| 5     | DCE     | trace                   |
| 6     | MeCN    | trace                   |
| 7     | Toluene | trace                   |
| 8     | EtOAc   | trace                   |

Reaction conditions: **1a** (1.0 equiv.), **2a** (0.2 mmol, 1.0 equiv.), Solvent (2.0 mL), 4CzIPN (2 mol%), Blue LEDs 10 W, for 24 h, under N<sub>2</sub>, isolated yield.

Photocatalyst

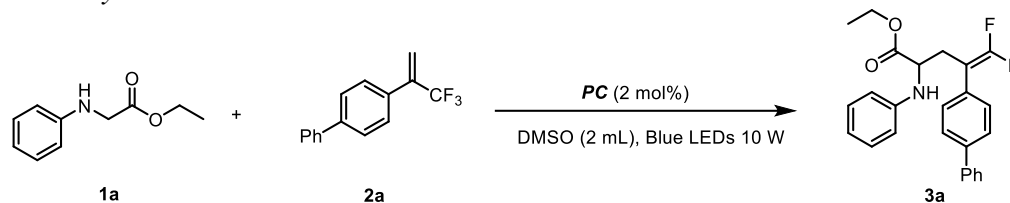

| Entry | PC                   | Yields (%) <sup>a</sup> |
|-------|----------------------|-------------------------|
| 1     | 4CzIPN               | 35                      |
| 2     | Rhodamine B          | 19                      |
| 3     | Eosin Y              | trace                   |
| 4     | Methylene Blue       | trace                   |
| 5     | Rose Bengale         | trace                   |
| 6     | Ir(ppy) <sub>3</sub> | trace <sup>b</sup>      |

<sup>a</sup> Reaction conditions: **1a** (0.2 mmol, 1.0 equiv.), **2a** (0.2 mmol, 1.0 equiv.), DMSO (2.0 mL), PC (2 mol%), Blue LEDs 10 W, for 24 h, under N<sub>2</sub>. <sup>b</sup> Ir(ppy)<sub>3</sub> as PC (2 mol%), for 24 h, under N<sub>2</sub>, isolated yield.

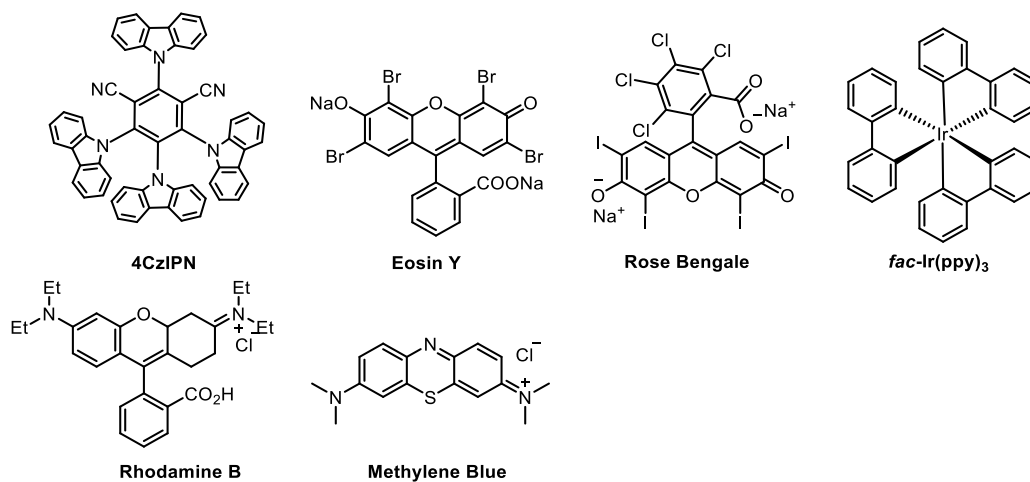



### Ratio of 1a:2a

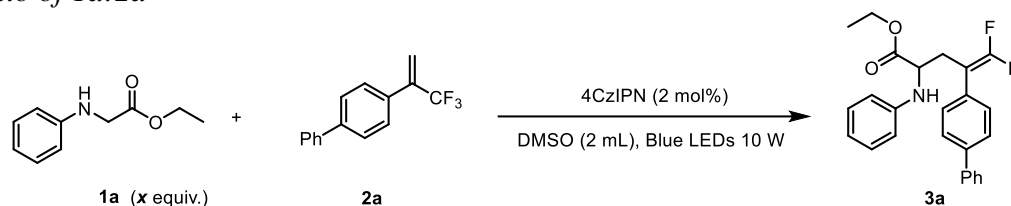

| Entry | <b>1a</b> : <b>2a</b> | Yields (%) <sup>a</sup> |
|-------|-----------------------|-------------------------|
| 1     | 1:1                   | 35                      |
| 2     | 1.2:1                 | 41                      |
| 3     | 1.5:1                 | 70                      |
| 4     | 2.0:1                 | 88                      |
| 5     | 2.5:1                 | 89                      |

<sup>a</sup> Reaction conditions: **1a** (x equiv.), **2a** (0.2 mmol, 1.0 equiv.), DMSO (2.0 mL), 4CzIPN (2 mol%), Blue LEDs 10 W, for 24 h, under N<sub>2</sub>, isolated yield.

### Ratio of 4CzIPN

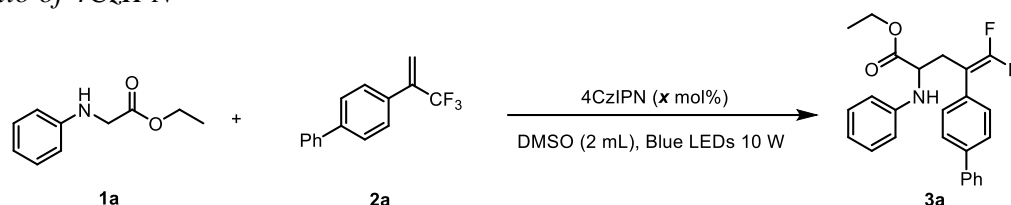

| Entry | 4CzIPN (x mol%) | Yields (%) <sup>a</sup> |
|-------|-----------------|-------------------------|
| 1     | 1               | 89                      |
| 2     | 2               | 88                      |
| 3     | 3               | 86                      |
| 4     | 0               | 0                       |

<sup>a</sup> Reaction conditions: **1a** (0.4 mmol, 2.0 equiv.), **2a** (0.2 mmol, 1.0 equiv.), DMSO (2.0 mL), 4CzIPN (x mol%), Blue LEDs 10 W, for 24 h, under N<sub>2</sub>, isolated yield.

### Light source

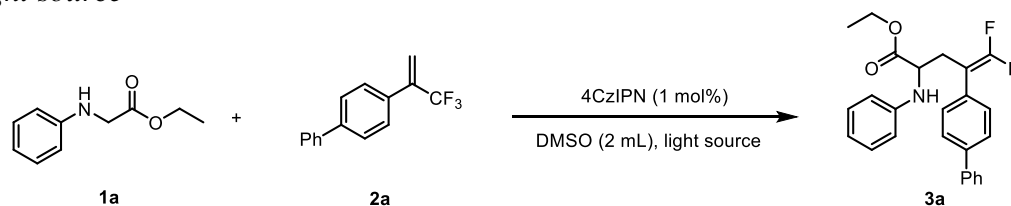

| Entry          | Light source     | Yields (%) <sup>a</sup> |
|----------------|------------------|-------------------------|
| 1              | Blue LEDs 2 W    | 92                      |
| 2              | Blue LEDs 6 W    | 90                      |
| 3              | Blue LEDs 10 W   | 88                      |
| 4              | White light 15 W | 20                      |
| 5 <sup>b</sup> | Blue LEDs 2 W    | 0                       |
| 6              | dark             | 0                       |

<sup>a</sup> Reaction conditions: **1a** (2.0 equiv.), **2a** (0.2 mmol, 1.0 equiv.), DMSO (2.0 mL), 4CzIPN (1 mol%), Light source, for 24 h, under N<sub>2</sub>, isolated yield, <sup>b</sup> under air.

*Time*

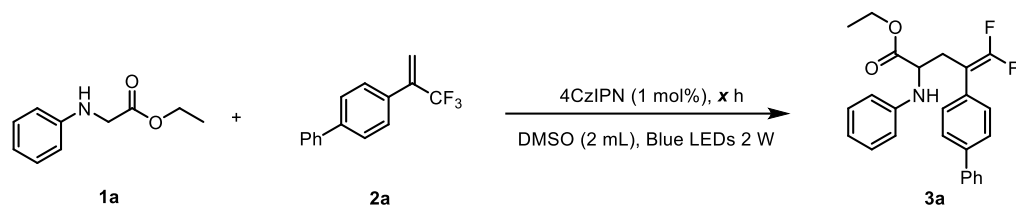

| Entry | Time (h) | Yields (%) <sup>a</sup> |
|-------|----------|-------------------------|
| 1     | 12       | 45                      |
| 2     | 18       | 77                      |
| 3     | 24       | 92                      |
| 4     | 30       | 90                      |

<sup>a</sup> Reaction conditions: **1a** (0.4 mmol, 2.0 equiv.), **2a** (0.2 mmol, 1.0 equiv.), DMSO (2.0 mL), 4CzIPN (1 mol%), Blue LEDs 2 W, for x h, under N<sub>2</sub>, isolated yield.

#### 4. Representative Procedure for the Glycine Derivatives **1** with Trifluoromethyl Alkenes **2** or **4**

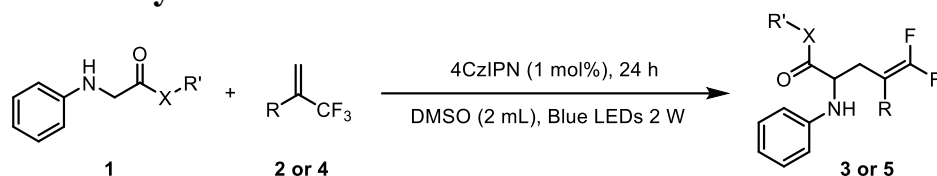

To a 10 mL oven-dried Schlenk-tube equipped with a magnetic stirrer was charged with glycine derivatives **1** (0.40 mmol, 2.0 equiv.) and 4CzIPN (1 mol%). Then, the tube was evacuated and backfilled with nitrogen (three times). Subsequently, a solution of trifluoromethyl alkenes **2** (0.20 mmol, 1.0 equiv.) in DMSO (2 mL) was added by a syringe. The reaction mixture was stirred under the irradiation of a 2 W blue LED ( $\lambda = 460\text{--}470$  nm; distance app. 1.0 cm from the bulb) for a specified time. After that, the resulting mixture was quenched with H<sub>2</sub>O and extracted with EtOAc (3 x 10 mL). The combined organic phase was washed with brine (10 mL), dried over Na<sub>2</sub>SO<sub>4</sub>, and concentrated in vacuo. Purification of the crude product by flash chromatography on silica gel (petroleum ether/EtOAc: 30:1 to 2:1) furnishes the corresponding products **3** and **5**.

#### The Visible-Light Photoredox Catalysis Experimental Setup (photographed by author Li-Na Guo)

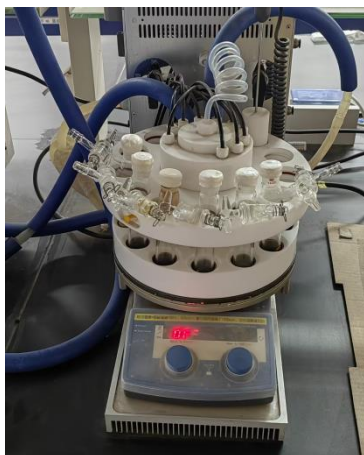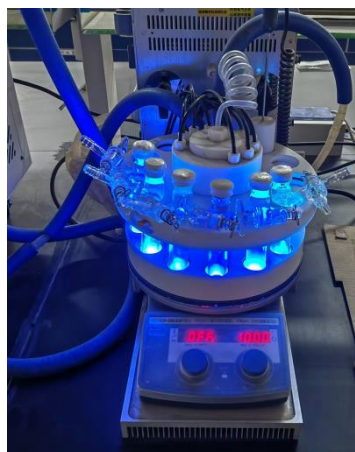

## 5. Large Scale synthesis of 3a and 5a

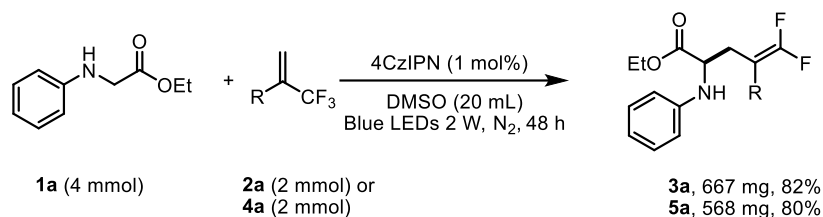

To a 50 mL oven-dried Schlenk-tube equipped with a magnetic stirrer was charged with glycine derivatives **1a** (4 mmol, 2.0 equiv.) and 4CzIPN (1 mol%). Then, the tube was evacuated and backfilled with nitrogen (three times). Subsequently, a solution of trifluoromethyl alkenes **2a** or **4a** (2 mmol, 1.0 equiv.) in DMSO (20 mL) was added by a syringe. The reaction mixture was stirred under the irradiation of 2 W blue LEDs ( $\lambda = 460\text{--}470 \text{ nm}$ ; distance app. 1.0 cm from the bulb) for a specified time. After that, the resulting mixture was quenched with  $\text{H}_2\text{O}$  and extracted with EtOAc (3 x 10 mL). The combined organic phase was washed with brine (10 mL), dried over  $\text{Na}_2\text{SO}_4$ , and concentrated in vacuo. Purification of the crude product by flash chromatography on silica gel (petroleum ether/EtOAc: 20:1) furnishes the corresponding products **3a** and **5a**.

## 6. Derivatizations of Products

### Reductions of 3a and 5a

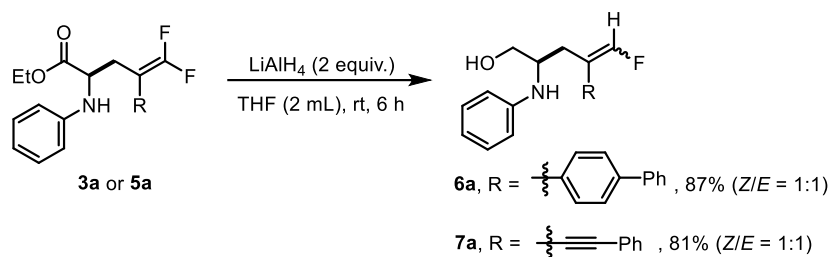

To a solution of product **3a** or **5a** (0.2 mmol, 1.0 equiv.) in THF (2 mL) was added lithium aluminium tetrahydride (0.42 mmol, 2.1 equiv.) at room temperature. The reaction mixture was stirred for 6 h. After completion as detected by TLC, the reaction was quenched with saturated  $\text{NH}_4\text{Cl}$  aqueous solution. The aqueous layer was extracted with ethyl acetate, the combined organic layer was dried over  $\text{Na}_2\text{SO}_4$ , filtered and concentrated under the reduced pressure. The residue was purified by column chromatography on silica gel (petroleum ether/ethyl acetate = 3 : 1) to afford

products **6a** or **7a**.

### *Esterifications of 6 and 7*

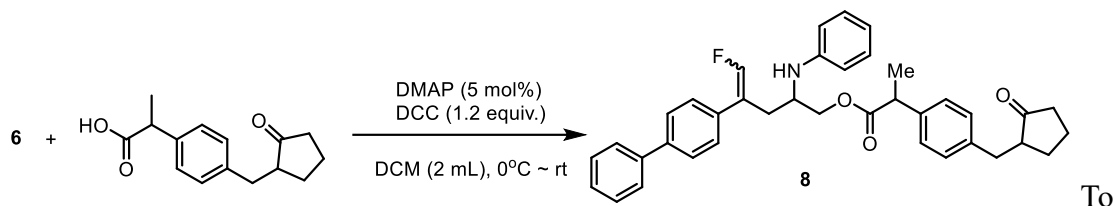

To a solution of **6** (0.2 mmol), Loxoprofen (0.24 mmol), and DMAP (5 mol%) in DCM (2 mL) at 0 °C was added DCC (0.24 mmol) in one portion. A precipitate began to form almost immediately. The reaction was stirred at 0°C for 10 min and then warmed to room temperature. After completion as detected by TLC, the reaction was then diluted with pentane (10 mL) and filtered through a short plug of silica. The aqueous layer was extracted with ethyl acetate, the combined organic layer was dried over Na<sub>2</sub>SO<sub>4</sub>, filtered and concentrated under the reduced pressure. The residue was purified by column chromatography on silica gel (petroleum ether/ethyl acetate = 10 : 1) to afford products **8**.

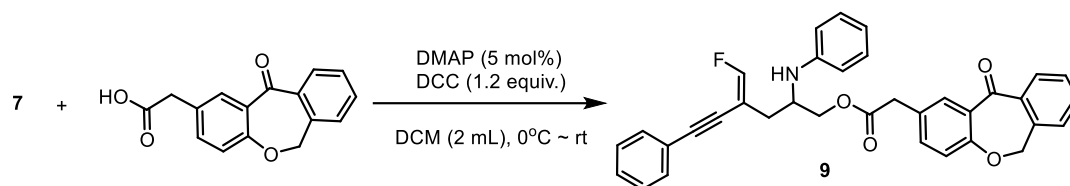

To a solution of **7** (0.2 mmol), Isoxepac (0.24 mmol), and DMAP (5 mol%) in DCM (2 mL) at 0 °C was added DCC (0.24 mmol) in one portion. A precipitate began to form almost immediately. The reaction was stirred at 0°C for 10 min and then warmed to room temperature. After completion as detected by TLC, the reaction was then diluted with pentane (10 mL) and filtered through a short plug of silica. The aqueous layer was extracted with ethyl acetate, the combined organic layer was dried over Na<sub>2</sub>SO<sub>4</sub>, filtered and concentrated under the reduced pressure. The residue was purified by column chromatography on silica gel (petroleum ether/ethyl acetate = 10 : 1) to afford products **9**.

### Suzuki coupling of **5j**

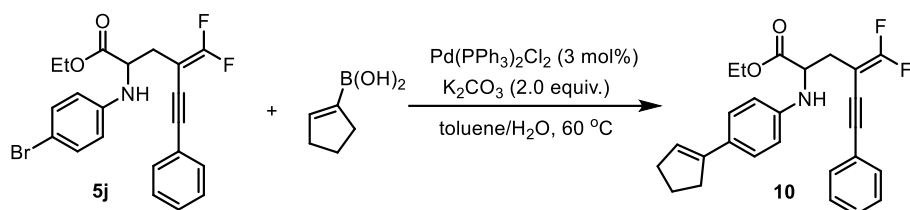

To a 10 mL oven-dried Schlenk-tube equipped with a magnetic stirrer was charged with 1-cyclopentenylboronic acid (0.24 mmol), K<sub>2</sub>CO<sub>3</sub> (2.0 equiv.) and Pd(PPh<sub>3</sub>)Cl<sub>2</sub> (3 mol %) were added. The vessel was evacuated and filled with nitrogen (three times). **5j** (0.2 mmol), toluene (2.0 mL), H<sub>2</sub>O (1.0 mL), and were added via syringe. The tube was put into a heating jacket and stirred at 60 °C overnight. The reaction mixture was cooled to room temperature. The aqueous layer was extracted with ethyl acetate, the combined organic layer was dried over Na<sub>2</sub>SO<sub>4</sub>, filtered and concentrated under the reduced pressure. The residue was purified by column chromatography on silica gel (hexane/EtOAc = 10:1) to give the desired coupling product **10** in 51% yield.

### Nucleophilic substitution of **3a**

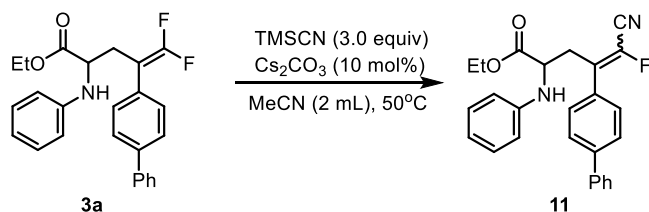

To a 10 mL oven-dried Schlenk-tube equipped with a magnetic stirrer was charged with **3a** (0.20 mmol), Cs<sub>2</sub>CO<sub>3</sub> (10 mol%), TMSCN (3.0 equiv.) and anhydrous MeCN (2.0 mL). Then the reaction was stirred at 50 °C for 24 h. The aqueous layer was extracted with ethyl acetate, the combined organic layer was dried over Na<sub>2</sub>SO<sub>4</sub>, filtered and concentrated under the reduced pressure. The residue was purified by column chromatography on silica gel (hexane/EtOAc = 10:1) to give the desired coupling product **11** in 66% yield.

## 7. Compatibility with biomolecules

The glycine ester **1a** (0.4 mmol), 1, 3-enyne **4a** (0.2 mmol), 4CzIPN (1 mol%), DMSO (2.0 mL) and H<sub>2</sub>O (0.5 mL) were added sequentially to a 10 mL oven-dried



## 8. Mechanism Studies

### (1) Radical Inhibiting Experiment

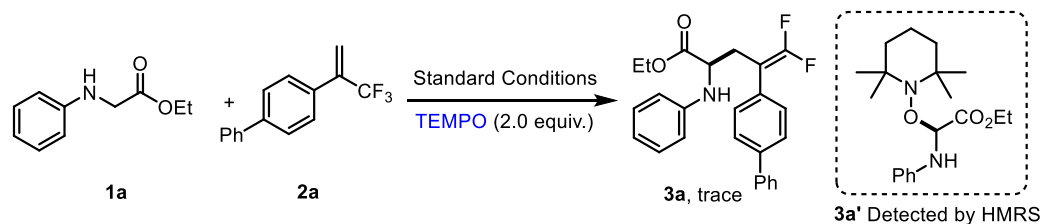

i) To a 10 mL oven-dried Schlenk-tube equipped with a magnetic stirrer was charged with glycine derivatives **1a** (0.4 mmol, 2.0 equiv.), 4CzIPN (1 mol%). Then, the tube was evacuated and backfilled with nitrogen (three times). Subsequently, a solution of trifluoromethyl alkenes **2a** (0.2 mmol, 1.0 equiv.) and TEMPO (0.4 mmol, 2.0 equiv.) in DMSO (2.0 mL) was added by a syringe. The reaction mixture was stirred under the irradiation of 2 W Blue LEDs ( $\lambda = 460\text{--}470$  nm; distance app. 1.0 cm from the bulb) for a specified time.

When 2.0 equiv. of TEMPO was subjected into the reaction of **1a** with **2a** under the standard conditions, only a trace amount of **3a** was observed, along with the TEMPO adduct **3a'** was detected by LC-HRMS. HRMS (ESI) calcd for  $\text{C}_{19}\text{H}_{31}\text{N}_2\text{O}_3\text{Na}$   $[\text{M}+\text{Na}]^+$  357.2149, found 357.2138. This result indicates that a radical intermediate might be involved in this transformation.

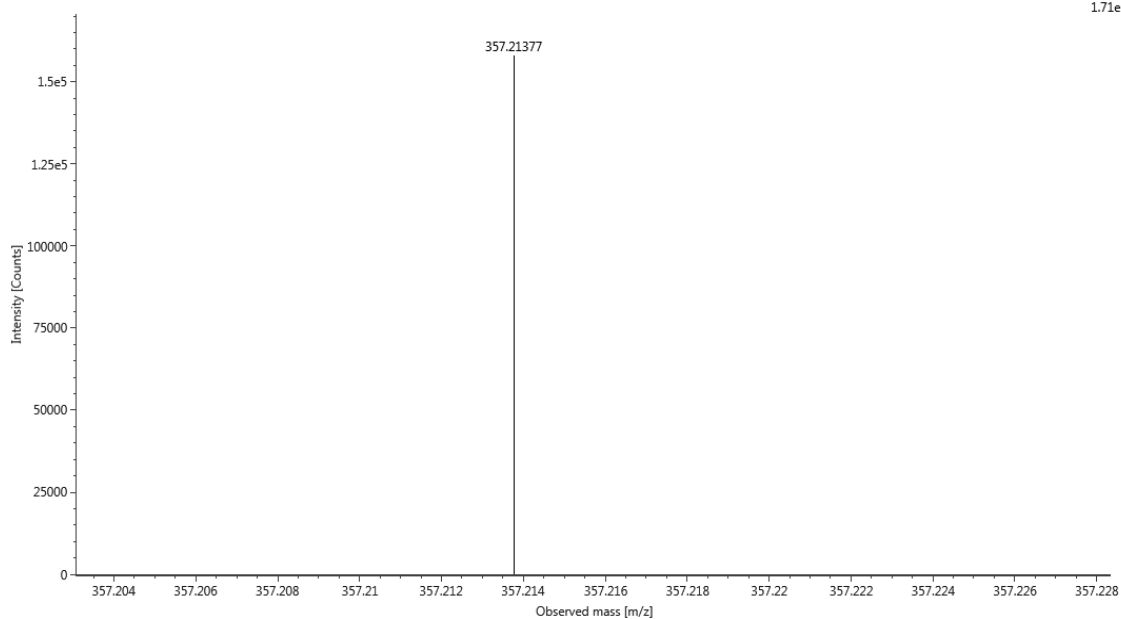



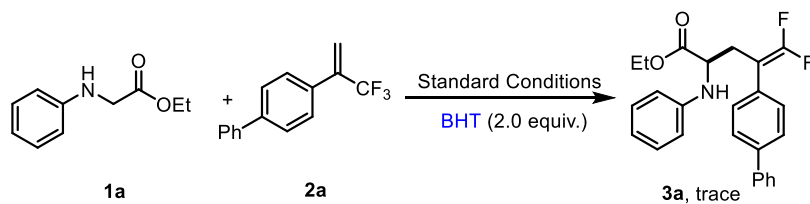

ii) To a 10 mL oven-dried Schlenk-tube equipped with a magnetic stirrer was charged with glycine derivative **1a** (0.4 mmol, 2.0 equiv.), 4CzIPN (1 mol%). Then, the tube was evacuated and backfilled with nitrogen (three times). Subsequently, a solution of trifluoromethyl alkene **2a** (0.2 mmol, 1.0 equiv.) and BHT (0.4 mmol, 2.0 equiv.) in DMSO (2.0 mL) was added by a syringe. The reaction mixture was stirred under the irradiation of 2 W Blue LEDs ( $\lambda = 460\text{--}470$  nm; distance app. 1.0 cm from the bulb) for a specified time.

When 2.0 equiv of BHT was subjected into the reaction of **1a** with **2a** under the standard conditions, only a trace amount of **3a** was observed. This result indicates that a radical pathway might be involved in this transformation.

## (2) Control Experiments

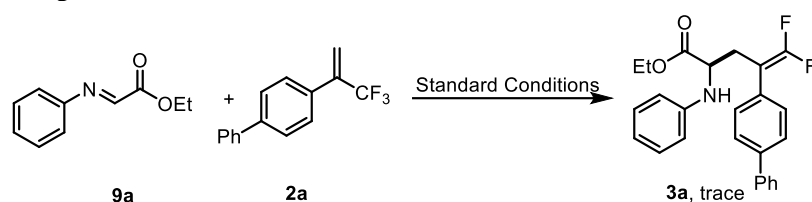

To a 10 mL oven-dried Schlenk-tube equipped with a magnetic stirrer was charged with **9a** (0.40 mmol, 2.0 equiv.), 4CzIPN (1 mol%), Then, the tube was evacuated and backfilled with nitrogen (three times). Subsequently, a solution of trifluoromethyl alkene **2a** (0.20 mmol, 1.0 equiv.) in DMSO (2.0 mL) was added by a syringe. The reaction mixture was stirred under the irradiation of 2 W Blue LEDs ( $\lambda = 460\text{--}470\text{ nm}$ ; distance app. 1.0 cm from the bulb) for a specified time. When ethyl-2-(phenylimino)acetate **9a** was used instead of **1a** under the standard conditions, only a trace amount of **3a** was observed. This result indicates that ethyl-2-(phenylimino)acetate **9a** was not the major intermediate in this transformation.

## (3) Stern-Volmer Fluorescence Quenching Experiments

To a solution of 4CzIPN in anhydrous,  $\text{N}_2$ -saturated DMSO ( $5 \times 10^{-4}\text{ mol/L}$ ) in a quartz cuvette, different amounts of glycine ester **1a** and trifluoromethyl alkenes **2a** were added, respectively, and the resulting changes in fluorescence intensity (concentration of **1a** and **2a**:  $2.5 \times 10^{-2}\text{ mol/L}$ ,  $5 \times 10^{-2}\text{ mol/L}$ ,  $7.5 \times 10^{-2}\text{ mol/L}$ ,  $10 \times 10^{-2}\text{ mol/L}$ ,  $12.5 \times 10^{-2}\text{ mol/L}$ ) were collected. The emission intensity at 536 nm was collected with excited wavelength of 460 nm. The results are shown in Figure S1 and S2.

a)

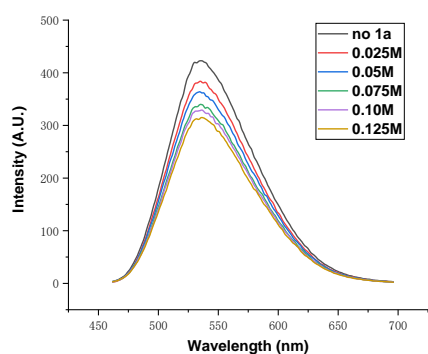

b)

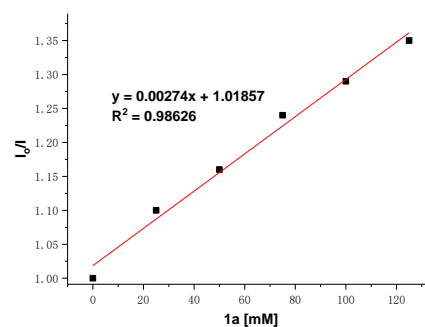

**Figure S1.** (a) The fluorescence emission spectra of 4CzIPN with different concentration of **1a**

added. (b) The Stern–Volmer emission quenching studies of **1a**.  $I_0$  is the inherent fluorescence intensity of 4CzIPN.  $I$  is the fluorescence intensity of 4CzIPN in the presence of **1a**.

c)

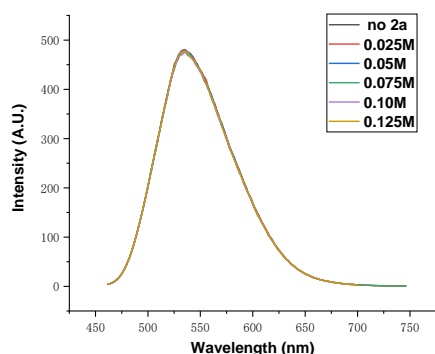

d)

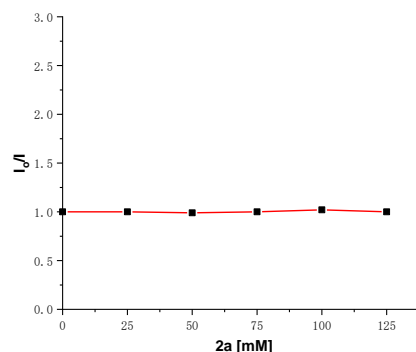

**Figure S2.** (c) The fluorescence emission spectra of 4CzIPN with different concentration of **2a** added. (d) The Stern–Volmer emission quenching studies of **2a**.  $I_0$  is the inherent fluorescence intensity of 4CzIPN.  $I$  is the fluorescence intensity of 4CzIPN in the presence of **2a**.

#### (4) Light On-Off experiments

To further examine the impact of light, we conducted experiments under alternating periods of irradiation and darkness. The yield of **3a** was determined by crude  $^{19}\text{F}$  NMR spectra using  $\text{PhCF}_3$  as an internal standard.

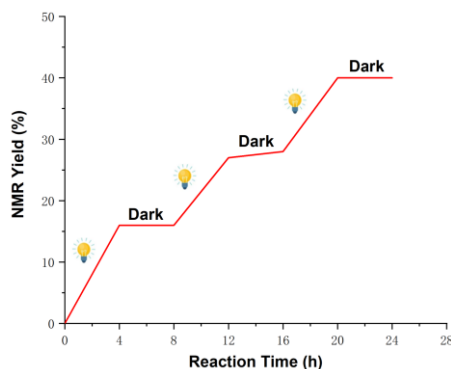

**Figure S3** Yield of Light On-Off Experiments

The results of light on-off experiments indicated that the reaction proceeded only under the irradiation of light. Thus, the reaction maybe proceed via a catalytic process rather than a radical chain process.

## 9. References

- 1 H. Xin, Z.-H. Yuan, M.-Y. Yang, M.-H. Wang, X.-H. Duan and L.-N. Guo., *Green Chem.*, **2021**, 23, 9549.
- 2 C. Zhu, M.-M. Sun, K. Chen, H. Liu and C. Feng, *Angew. Chem., Int. Ed.*, **2021**, 60, 20237.
- 3 Z. Kuang, H. Chen, J. Qiu, Z. Ou, Y. Lan, and Q. Song, *Chem.*, **2020**, 6, 2347.

## 10. Characterization of Products

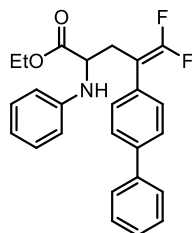

### Ethyl 4-([1,1'-biphenyl]-4-yl)-5,5-difluoro-2-(phenylamino)pent-4-enoate (3a).

colorless oil (92%, 74.9 mg);  $R_f = 0.50$  (petroleum ether/ethyl acetate = 20:1);  $^1\text{H}$  NMR (400 MHz,  $\text{CDCl}_3$ )  $\delta$  7.64 – 7.61 (m, 4H), 7.48 (t,  $J = 7.6$  Hz, 2H), 7.42 – 7.39 (m, 3H), 7.14 (dd,  $J = 8.4, 7.2$  Hz, 2H), 6.74 (t,  $J = 7.2$  Hz, 1H), 6.51 (d,  $J = 7.6$  Hz, 2H), 4.13 – 4.02 (m, 4H), 2.96 (s, 2H), 1.23 (t,  $J = 7.2$  Hz, 3H);  $^{13}\text{C}$  NMR (100 MHz,  $\text{CDCl}_3$ )  $\delta$  173.1, 154.7 (dd,  $J = 289.5, 287.0$  Hz), 146.3, 140.7, 140.5, 131.6 (t,  $J = 3.3$  Hz), 129.4, 129.0, 127.7, 127.4, 127.2, 118.6, 113.7, 88.8 (dd,  $J = 21.2, 16.3$  Hz), 61.5, 55.3, 31.6, 14.2;  $^{19}\text{F}$  NMR (376 MHz,  $\text{CDCl}_3$ )  $\delta$  -88.81 (d,  $J = 37.6$  Hz), -89.16 (d,  $J = 37.6$  Hz); IR (neat):  $\nu_{\text{max}}$  ( $\text{cm}^{-1}$ ) 3390, 2923, 1731, 1602, 1504, 1377, 1192, 1028, 755  $\text{cm}^{-1}$ ; HRMS (ESI) calcd for  $\text{C}_{25}\text{H}_{24}\text{F}_2\text{NO}_2$   $[\text{M}+\text{H}]^+$  408.1769, found 408.1762.

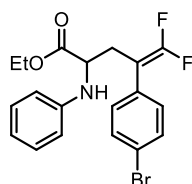

### Ethyl 4-(4-bromophenyl)-5,5-difluoro-2-(phenylamino)pent-4-enoate (3b).

colorless oil (86%, 70.3 mg);  $R_f = 0.40$  (petroleum ether/ethyl acetate = 20:1);  $^1\text{H}$  NMR (400 MHz,  $\text{CDCl}_3$ )  $\delta$  7.50 (d,  $J = 8.4$  Hz, 2H), 7.19 – 7.11 (m, 4H), 6.74 (t,  $J = 7.6$  Hz, 1H), 6.47 (d,  $J = 8.0$  Hz, 2H), 4.10 – 3.02 (m, 3H), 2.88 (s, 2H), 1.21 (t,  $J = 7.1$  Hz, 3H);  $^{13}\text{C}$  NMR (100 MHz,  $\text{CDCl}_3$ )  $\delta$  172.9, 154.6 (dd,  $J = 290.2, 287.6$  Hz), 146.2, 131.9, 131.7 (t,  $J = 3.3$  Hz), 130.3 (t,  $J = 2.9$  Hz), 129.4, 121.9, 118.8, 113.7, 88.4 (dd,  $J = 21.8, 16.2$  Hz), 61.6, 55.2, 31.5, 14.2;  $^{19}\text{F}$  NMR (376 MHz,  $\text{CDCl}_3$ )  $\delta$  -88.49 (d,  $J = 36.5$  Hz), -88.86 (d,  $J = 36.5$  Hz); IR (neat):  $\nu_{\text{max}}$  ( $\text{cm}^{-1}$ ) 3370, 2856, 1734, 1601, 1499, 1375, 1249, 822  $\text{cm}^{-1}$ ; HRMS (ESI) calcd for  $\text{C}_{19}\text{H}_{19}\text{BrF}_2\text{NO}_2$   $[\text{M}+\text{H}]^+$  410.0561, found 410.0547.

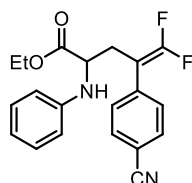

### Ethyl 4-(4-cyanophenyl)-5,5-difluoro-2-(phenylamino)pent-4-enoate (3c).

colorless oil (66%, 47.0 mg);  $R_f = 0.40$  (petroleum ether/ethyl acetate = 10:1);  $^1\text{H}$  NMR (400 MHz,  $\text{CDCl}_3$ )  $\delta$  7.63 (d,  $J = 8.4$  Hz, 2H), 7.40 (d,  $J = 8.0$  Hz, 2H), 7.12 (t,  $J = 8.0$  Hz, 2H), 6.73 (t,  $J = 7.2$  Hz, 1H), 6.44 (d,  $J = 7.6$  Hz, 2H), 4.15 – 3.99 (m, 3H), 2.98 – 2.88 (m, 2H), 1.21 (t,  $J = 7.2$  Hz, 3H);  $^{13}\text{C}$  NMR (100 MHz,  $\text{CDCl}_3$ )  $\delta$  172.6,

154.8 (dd,  $J = 292.2, 289.4$  Hz), 145.9, 137.8 (dd,  $J = 4.0, 3.0$  Hz), 132.3, 129.4, 129.2 (t,  $J = 3.2$  Hz), 118.8, 118.5, 113.6, 111.5, 88.5 (dd,  $J = 22.0, 15.0$  Hz), 61.6, 55.2, 30.9, 14.1;  $^{19}\text{F}$  NMR (376 MHz,  $\text{CDCl}_3$ )  $\delta$  -86.40 (d,  $J = 30.8$  Hz), -86.56 (d,  $J = 30.8$  Hz); IR (neat):  $\nu_{\text{max}}$  ( $\text{cm}^{-1}$ ) 3380, 3054, 2260, 1729, 1601, 1506, 1311, 840  $\text{cm}^{-1}$ ; HRMS (ESI) calcd for  $\text{C}_{20}\text{H}_{19}\text{F}_2\text{N}_2\text{O}_2$   $[\text{M}+\text{H}]^+$  357.1409, found 357.1411.

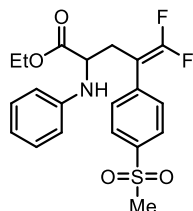

**Ethyl 5,5-difluoro-4-(4-(methylsulfonyl)phenyl)-2-(phenylamino)pent-4-enoate (3d).**

colorless oil (77%, 63.0 mg);  $R_f = 0.40$  (petroleum ether/ethyl acetate = 10:1);  $^1\text{H}$  NMR (400 MHz,  $\text{CDCl}_3$ )  $\delta$  7.91 (d,  $J = 8.4$  Hz, 2H), 7.49 (d,  $J = 8.0$  Hz, 2H), 7.10 (t,  $J = 8.0$  Hz, 2H), 6.71 (t,  $J = 7.6$  Hz, 1H), 6.44 (d,  $J = 8.0$  Hz, 2H), 4.11 – 4.02 (m, 3H), 3.05 (s, 3H), 3.01 – 2.89 (m, 2H), 1.20 (t,  $J = 7.2$  Hz, 3H);  $^{13}\text{C}$  NMR (100 MHz,  $\text{CDCl}_3$ )  $\delta$  172.6, 154.9 (dd,  $J = 292.1, 289.2$  Hz), 145.9, 139.7, 138.7 (t,  $J = 3.2$  Hz), 129.4 (t,  $J = 3.1$  Hz), 129.4, 127.7, 118.7, 113.5, 88.4 (dd,  $J = 22.2, 15.5$  Hz), 61.6, 55.1, 44.4, 31.1, 14.1;  $^{19}\text{F}$  NMR (376 MHz,  $\text{CDCl}_3$ )  $\delta$  -86.50 (d,  $J = 31.2$  Hz), -86.72 (d,  $J = 31.2$  Hz); IR (neat):  $\nu_{\text{max}}$  ( $\text{cm}^{-1}$ ) 3375, 2985, 2941, 2361, 1727, 1309, 1140, 774  $\text{cm}^{-1}$ ; HRMS (ESI) calcd for  $\text{C}_{20}\text{H}_{22}\text{F}_2\text{NO}_4\text{S}$   $[\text{M}+\text{H}]^+$  410.1232, found 410.1230.

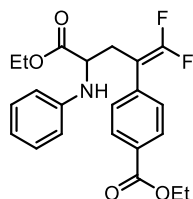

**Ethyl 4-(5-ethoxy-1,1-difluoro-5-oxo-4-(phenylamino)pent-1-en-2-yl)benzoate (3e).**

colorless oil (86%, 69.3 mg);  $R_f = 0.4$  (petroleum ether/ethyl acetate = 15:1);  $^1\text{H}$  NMR (400 MHz,  $\text{CDCl}_3$ )  $\delta$  8.05 (d,  $J = 8.0$  Hz, 2H), 7.39 (d,  $J = 8.0$  Hz, 2H), 7.12 (t,  $J = 7.6$  Hz, 2H), 6.73 (t,  $J = 7.2$  Hz, 1H), 6.47 (d,  $J = 8.0$  Hz, 2H), 4.40 (q,  $J = 7.2$  Hz, 2H), 4.11 – 4.01 (m, 3H), 2.94 (d,  $J = 4.0$  Hz, 2H), 1.41 (t,  $J = 7.2$  Hz, 3H), 1.20 (t,  $J = 7.2$  Hz, 3H);  $^{13}\text{C}$  NMR (100 MHz,  $\text{CDCl}_3$ )  $\delta$  172.8, 166.2, 154.8 (dd,  $J = 291.6, 288.1$  Hz), 146.2, 137.4 (t,  $J = 3.8$  Hz), 129.9, 129.4, 128.5 (t,  $J = 3.0$  Hz), 118.8, 113.7, 88.8 (dd,  $J = 21.6, 15.7$  Hz), 61.5, 61.2, 55.3, 31.4, 14.4, 14.2;  $^{19}\text{F}$  NMR (376 MHz,  $\text{CDCl}_3$ )  $\delta$  -87.46 (d,  $J = 33.9$  Hz), -87.71 (d,  $J = 34.0$  Hz); IR (neat):  $\nu_{\text{max}}$  ( $\text{cm}^{-1}$ ) 3377, 2986, 2877, 1714, 1274, 1022, 857  $\text{cm}^{-1}$ ; HRMS (ESI) calcd for  $\text{C}_{22}\text{H}_{24}\text{F}_2\text{NO}_4$   $[\text{M}+\text{H}]^+$  404.1668, found 404.1661.

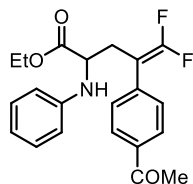

**Ethyl 4-(4-acetylphenyl)-5,5-difluoro-2-(phenylamino)pent-4-enoate (3f).**

colorless oil (77%, 57.4 mg);  $R_f = 0.60$  (petroleum ether/ethyl acetate = 10:1);  $^1\text{H}$  NMR (400 MHz,  $\text{CDCl}_3$ )  $\delta$  7.90 – 7.87 (m, 2H), 7.52 – 7.45 (m, 2H), 7.11 (t,  $J = 8.0$  Hz, 2H), 6.71 (t,  $J = 7.2$  Hz, 1H), 6.44 (d,  $J = 7.6$  Hz, 2H), 4.10 – 4.12 (m, 3H), 2.97 – 2.91 (m, 2H), 2.55 (s, 3H), 1.21 (t,  $J = 7.2$  Hz, 3H);  $^{13}\text{C}$  NMR (100 MHz,  $\text{CDCl}_3$ )  $\delta$  197.7, 172.8, 154.8 (dd,  $J = 290.1, 287.8$  Hz), 146.1, 137.5, 133.3, 129.4, 129.0, 128.4 (t,  $J = 2.8$  Hz), 127.7, 118.7, 113.6, 88.6 (dd,  $J = 21.6, 16.2$  Hz), 61.5, 55.1, 31.3, 26.7, 14.1;  $^{19}\text{F}$  NMR (376 MHz,  $\text{CDCl}_3$ )  $\delta$  -88.59 (d,  $J = 36.5$  Hz), -88.88 (d,  $J = 36.5$  Hz); IR (neat):  $\nu_{\text{max}}$  ( $\text{cm}^{-1}$ ) 3374, 2984, 2361, 1730, 1602, 1230, 1025, 796  $\text{cm}^{-1}$ ; HRMS (ESI) calcd for  $\text{C}_{21}\text{H}_{22}\text{F}_2\text{NO}_3$   $[\text{M}+\text{H}]^+$  374.1562, found 374.1551.

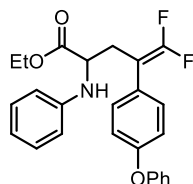

**Ethyl 5,5-difluoro-4-(4-phenoxyphenyl)-2-(phenylamino)pent-4-enoate (3g).**

colorless oil (63%, 53.3 mg);  $R_f = 0.5$  (petroleum ether/ethyl acetate = 15:1);  $^1\text{H}$  NMR (400 MHz,  $\text{CDCl}_3$ )  $\delta$  7.39 (t,  $J = 8.4$  Hz, 2H), 7.29 (d,  $J = 8.8$  Hz, 2H), 7.16 (t,  $J = 8.4$  Hz, 3H), 7.07 (d,  $J = 8.4$  Hz, 2H), 7.02 (d,  $J = 8.4$  Hz, 2H), 6.76 (t,  $J = 7.2$  Hz, 1H), 6.52 (d,  $J = 8.0$  Hz, 2H), 4.14 – 4.07 (m, 3H), 2.92 – 2.90 (m, 2H), 1.24 (t,  $J = 7.2$  Hz, 3H);  $^{19}\text{F}$  NMR (376 MHz,  $\text{CDCl}_3$ )  $\delta$  -89.60 (d,  $J = 39.1$  Hz), -90.07 (d,  $J = 39.1$  Hz);  $^{13}\text{C}$  NMR (100 MHz,  $\text{CDCl}_3$ )  $\delta$  173.0, 157.1, 156.8, 154.6 (dd,  $J = 289.1, 286.8$  Hz), 146.2, 130.1 (t,  $J = 2.8$  Hz), 123.0, 129.4, 127.2 (dd,  $J = 3.7, 3.2$  Hz), 123.8, 119.4, 118.7, 113.7, 88.4 (dd,  $J = 21.3, 16.4$  Hz), 61.5, 55.3, 31.7, 14.2; IR (neat):  $\nu_{\text{max}}$  ( $\text{cm}^{-1}$ ) 3376, 2983, 1718, 1603, 1372, 1089, 752  $\text{cm}^{-1}$ ; HRMS (ESI) calcd for  $\text{C}_{25}\text{H}_{24}\text{F}_2\text{NO}_3$   $[\text{M}+\text{H}]^+$  424.1719, found 424.1722.

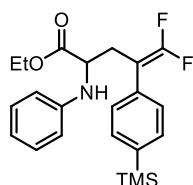

**Ethyl 5,5-difluoro-2-(phenylamino)-4-(4-(trimethylsilyl)phenyl)pent-4-enoate (3h).**

colorless oil (58%, 46.7 mg);  $R_f = 0.6$  (petroleum ether/ethyl acetate = 25:1);  $^1\text{H}$  NMR (400 MHz,  $\text{CDCl}_3$ )  $\delta$  7.52 (d,  $J = 8.0$  Hz, 2H), 7.29 (d,  $J = 7.2$  Hz, 2H), 7.12 (t,  $J = 7.6$  Hz, 2H), 6.72 (t,  $J = 7.6$  Hz, 1H), 6.47 (d,  $J = 7.6$  Hz, 2H), 4.09 – 3.96 (m, 3H), 2.92 – 2.90 (m, 2H), 1.19 (t,  $J = 7.2$  Hz, 3H), 0.28 (s, 9H);  $^{13}\text{C}$  NMR (100 MHz,  $\text{CDCl}_3$ )  $\delta$  173.1, 154.7 (dd,  $J = 289.9, 286.8$  Hz), 146.3, 140.3, 133.7, 133.1 (t,  $J = 3.4$  Hz), 129.4, 127.9 (t,  $J = 3.4$  Hz), 118.7 (s), 113.8, 89.0 (dd,  $J = 21.0, 16.2$  Hz), 61.5, 55.4, 31.5, 14.2, -1.0;  $^{19}\text{F}$  NMR (376 MHz,  $\text{CDCl}_3$ )  $\delta$  -89.12 (d,  $J = 37.6$  Hz), -89.47 (d,  $J =$

37.6 Hz); IR (neat):  $\nu_{\max}$  (cm<sup>-1</sup>) 3386, 3057, 2816, 2360, 1730, 1602, 1181, 781 cm<sup>-1</sup>; HRMS (ESI) calcd for C<sub>22</sub>H<sub>28</sub>F<sub>2</sub>NO<sub>2</sub>Si [M+H]<sup>+</sup> 404.1852, found 404.1835.

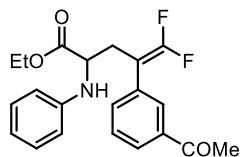

**Ethyl 4-(3-acetylphenyl)-5,5-difluoro-2-(phenylamino)pent-4-enoate (3i).**

colorless oil (60%, 44.8 mg);  $R_f$  = 0.6 (petroleum ether/ethyl acetate = 10:1); <sup>1</sup>H NMR (400 MHz, CDCl<sub>3</sub>)  $\delta$  7.90 – 7.86 (m, 2H), 7.52 – 7.45 (m, 2H), 7.11 (t,  $J$  = 8.4 Hz, 2H), 6.72 (t,  $J$  = 7.6 Hz, 1H), 6.46 (d,  $J$  = 7.6 Hz, 2H), 4.12 – 4.00 (m, 3H), 2.99 – 2.91 (m, 3H), 2.55 (s, 3H), 1.21 (t,  $J$  = 7.2 Hz, 3H); <sup>19</sup>F NMR (376 MHz, CDCl<sub>3</sub>)  $\delta$  -88.54 (d,  $J$  = 36.1 Hz), -88.82 (d,  $J$  = 36.5 Hz); <sup>13</sup>C NMR (100 MHz, CDCl<sub>3</sub>)  $\delta$  197.8, 172.8, 154.8 (dd,  $J$  = 289.7, 287.7 Hz), 146.0 (d,  $J$  = 4.8 Hz), 137.5, 133.3 (dd,  $J$  = 6.8, 4.2 Hz), 129.4, 129.0, 128.5 (t,  $J$  = 2.7 Hz), 127.8, 118.8 (d,  $J$  = 6.2 Hz), 113.7 (d,  $J$  = 5.9 Hz), 88.6 (dd,  $J$  = 21.6, 16.3 Hz), 61.6, 55.2, 31.4, 26.7, 14.2; IR (neat):  $\nu_{\max}$  (cm<sup>-1</sup>) 3374, 2983, 1715, 1602, 1371, 1024, 750 cm<sup>-1</sup>; HRMS (ESI) calcd for C<sub>21</sub>H<sub>22</sub>F<sub>2</sub>NO<sub>3</sub> [M+H]<sup>+</sup> 374.1562, found 374.1555.

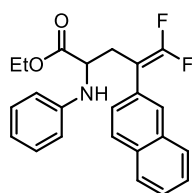

**Ethyl 5,5-difluoro-4-(naphthalen-2-yl)-2-(phenylamino)pent-4-enoate (3j).**

colorless oil (79%, 60.2 mg);  $R_f$  = 0.5 (petroleum ether/ethyl acetate = 20:1); <sup>1</sup>H NMR (400 MHz, CDCl<sub>3</sub>)  $\delta$  7.91 – 7.76 (m, 4H), 7.56 – 7.49 (m, 2H), 7.45 (d,  $J$  = 8.4 Hz, 1H), 7.11 (t,  $J$  = 7.6 Hz, 2H), 6.73 (t,  $J$  = 7.2 Hz, 1H), 6.48 (d,  $J$  = 7.6 Hz, 2H), 4.17 – 3.96 (m, 4H), 3.03 (s, 2H), 1.20 (t,  $J$  = 7.2 Hz, 3H); <sup>13</sup>C NMR (100 MHz, CDCl<sub>3</sub>)  $\delta$  173.1, 154.8 (dd,  $J$  = 289.9, 287.1 Hz), 146.3, 133.3, 132.8, 130.0 (t,  $J$  = 3.0 Hz), 129.3, 128.4, 128.1, 127.9 (t,  $J$  = 3.0 Hz), 127.8, 126.6, 126.5, 126.3 (t,  $J$  = 2.9 Hz), 118.6, 113.7, 89.2 (dd,  $J$  = 21.2, 16.2 Hz), 61.4, 55.3, 31.8, 14.1; <sup>19</sup>F NMR (376 MHz, CDCl<sub>3</sub>)  $\delta$  -89.01 (d,  $J$  = 37.6 Hz), -89.29 (d,  $J$  = 37.6 Hz); IR (neat):  $\nu_{\max}$  (cm<sup>-1</sup>) 3379, 3055, 2361, 1727, 1602, 1229, 1109, 818 cm<sup>-1</sup>; HRMS (ESI) calcd for C<sub>23</sub>H<sub>22</sub>F<sub>2</sub>NO<sub>2</sub> [M+H]<sup>+</sup> 382.1613, found 382.1601.

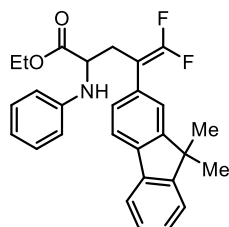

**Ethyl 4-(9,9-dimethyl-9H-fluoren-2-yl)-5,5-difluoro-2-(phenylamino)pent-4-enoate (3k).**

White solid (85%, 76.0 mg);  $R_f$  = 0.5 (petroleum ether/ethyl acetate = 15:1); <sup>1</sup>H NMR (400 MHz, CDCl<sub>3</sub>)  $\delta$  7.76 – 7.70 (m, 2H), 7.45 (d,  $J$  = 6.0 Hz, 1H), 7.39 – 7.28 (m, 5H), 7.10 (t,  $J$  = 7.2 Hz, 2H), 6.71 (t,  $J$  = 7.2 Hz, 1H), 6.48 (d,  $J$  = 8.0 Hz, 2H), 4.12 –



4.03 (m, 3H), 2.96 (d,  $J = 6.0$  Hz, 2H), 1.48 (s, 3H), 1.49 (s, 3H), 1.21 (t,  $J = 7.2$  Hz, 3H);  $^{13}\text{C}$  NMR (100 MHz,  $\text{CDCl}_3$ )  $\delta$  173.1, 154.7 (dd,  $J = 289.6, 287.2$  Hz), 154.1, 153.9, 146.3, 139.0, 138.7, 131.5 (t,  $J = 3.0$  Hz), 129.4, 127.7, 127.6 (t,  $J = 2.7$  Hz), 127.2, 122.9 (t,  $J = 2.7$  Hz), 122.8, 120.3, 120.2, 118.7, 113.7, 89.5 (dd,  $J = 21.1, 15.7$  Hz), 61.5, 55.4, 47.0, 32.0, 27.3, 14.2;  $^{19}\text{F}$  NMR (376 MHz,  $\text{CDCl}_3$ )  $\delta$  -89.16 (d,  $J = 38.7$  Hz), -89.89 (d,  $J = 38.7$  Hz); IR (neat):  $\nu_{\text{max}}$  ( $\text{cm}^{-1}$ ) 3385, 3059, 2360, 1730, 1602, 1254, 1024, 831  $\text{cm}^{-1}$ ; HRMS (ESI) calcd for  $\text{C}_{28}\text{H}_{28}\text{F}_2\text{NO}_2$   $[\text{M}+\text{H}]^+$  448.2083, found 448.2071.

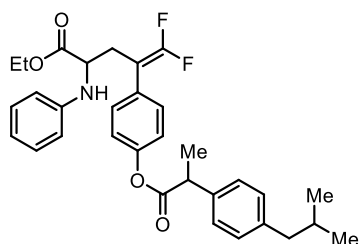

**Ethyl 5,5-difluoro-4-(4-((2-(4-isobutylphenyl)propanoyl)oxy)phenyl)-2-(phenylamino)pent-4-enoate (3l).**

colorless oil (51%, 54.6 mg, d.r. = 1:1);  $R_f = 0.4$  (petroleum ether/ethyl acetate = 5:1);  $^1\text{H}$  NMR (400 MHz,  $\text{CDCl}_3$ )  $\delta$  7.31 – 7.25 (m, 4H), 7.16 – 7.09 (m, 4H), 7.00 (d,  $J = 8.4$  Hz, 2H), 6.71 (t,  $J = 7.2$  Hz, 1H), 6.46 (d,  $J = 7.6$  Hz, 2H), 4.05 – 3.93 (m, 5H), 2.86 (s, 2H), 2.46 (d,  $J = 7.2$  Hz, 2H), 1.90 – 1.83 (m, 1H), 1.60 (d,  $J = 7.2$  Hz, 3H), 1.19 (t,  $J = 7.2$  Hz, 3H), 0.91 (d,  $J = 6.4$  Hz, 6H);  $^{13}\text{C}$  NMR (100 MHz,  $\text{CDCl}_3$ )  $\delta$  173.2, 173.0, 154.6 (dd,  $J = 289.3, 287.2$  Hz), 150.4, 146.3, 141.0, 137.2, 130.1 (t,  $J = 3.2$  Hz), 129.7, 129.4, 127.3, 121.8, 118.7, 113.7, 88.4 (dd,  $J = 21.7, 16.3$  Hz), 61.5, 55.2, 45.4, 45.2, 31.7, 30.3, 22.5, 18.6, 14.2;  $^{19}\text{F}$  NMR (376 MHz,  $\text{CDCl}_3$ )  $\delta$  -89.00 (d,  $J = 37.6$  Hz), -89.50 (d,  $J = 37.6$  Hz); IR (neat):  $\nu_{\text{max}}$  ( $\text{cm}^{-1}$ ) 3332, 3030, 2857, 1726, 1643, 1460, 1236, 764  $\text{cm}^{-1}$ ; HRMS (ESI) calcd for  $\text{C}_{32}\text{H}_{36}\text{F}_2\text{NO}_4$   $[\text{M}+\text{H}]^+$  536.2607, found 536.2587.

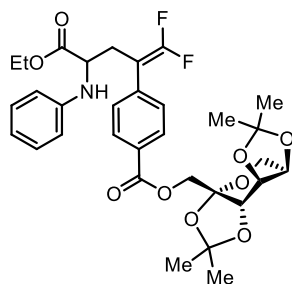

**((3aS,5aR,8aR,8bS)-2,2,7,7-Tetramethyltetrahydro-3aH-bis([1,3]dioxolo)[4,5-b:4',5'-d]pyran-3a-yl)methyl 4-(5-ethoxy-1,1-difluoro-5-oxo-4-(phenylamino)pent-1-en-2-yl)benzoate (3m).**

white solid (67%, 82.7 mg);  $R_f = 0.4$  (petroleum ether/ethyl acetate = 3:1);  $^1\text{H}$  NMR (400 MHz,  $\text{CDCl}_3$ )  $\delta$  8.07 (d,  $J = 8.4$  Hz, 2H), 7.39 (d,  $J = 8.0$  Hz, 2H), 7.11 (t,  $J = 7.2$  Hz, 2H), 6.72 (t,  $J = 7.2$  Hz, 1H), 6.45 (d,  $J = 7.6$  Hz, 2H), 4.71 – 4.64 (m, 2H), 4.47 (s, 1H), 4.35 (dd,  $J = 11.6, 2.4$  Hz, 1H), 4.27 (d,  $J = 7.6$  Hz, 1H), 4.14 – 3.95 (m, 5H), 3.83 (t,  $J = 12.4$  Hz, 1H), 2.93 (s, 2H), 1.56 (s, 3H), 1.47 (s, 3H), 1.39 (s, 3H), 1.35 (s, 3H), 1.20 (t,  $J = 8.0$  Hz, 3H);  $^{13}\text{C}$  NMR (100 MHz,  $\text{CDCl}_3$ )  $\delta$  172.8, 165.6, 154.8 (dd,  $J = 291.8, 288.5$  Hz), 146.1, 137.8, 130.1, 129.4, 128.5 (t,  $J = 2.9$  Hz), 118.8, 113.6, 109.3, 109.0, 101.7, 88.8 (dd,  $J = 21.5, 15.8$  Hz), 70.9, 70.7, 70.2, 65.6, 61.52, 61.46,

55.2, 31.3, 26.6, 26.0, 25.7, 24.1, 14.2;  $^{19}\text{F}$  NMR (376 MHz,  $\text{CDCl}_3$ )  $\delta$  -87.17 (dd,  $J = 33.1, 9.6$  Hz), -87.34 (dd,  $J = 33.1, 9.6$  Hz); IR (neat):  $\nu_{\text{max}}$  ( $\text{cm}^{-1}$ ) 3309, 3001, 2769, 2293, 1736, 1313, 1179, 843  $\text{cm}^{-1}$ ; HRMS (ESI) calcd for  $\text{C}_{32}\text{H}_{38}\text{F}_2\text{NO}_9$   $[\text{M}+\text{H}]^+$  618.2509, found 618.2499.

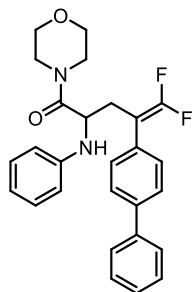

**4-([1,1'-Biphenyl]-4-yl)-5,5-difluoro-1-morpholino-2-(phenylamino)pent-4-en-1-one (3n).**

yellow solid (84%, 75.3 mg); m.p.: 130-131 °C;  $R_f = 0.5$  (petroleum ether/ethyl acetate = 8:1);  $^1\text{H}$  NMR (400 MHz,  $\text{CDCl}_3$ )  $\delta$  7.69 – 7.55 (m, 4H), 7.48 (t,  $J = 7.2$  Hz, 2H), 7.39 (d,  $J = 8.0$  Hz, 3H), 7.14 (t,  $J = 8.0$  Hz, 2H), 6.74 (t,  $J = 7.2$  Hz, 1H), 6.50 (d,  $J = 8.0$  Hz, 2H), 4.40 (s, 2H), 3.61 – 3.54 (m, 5H), 3.47 – 3.33 (m, 3H), 2.09 (s, 2H);  $^{13}\text{C}$  NMR (100 MHz,  $\text{CDCl}_3$ )  $\delta$  170.8, 154.6 (dd,  $J = 291.0, 287.2$  Hz), 146.5, 140.6, 140.3, 131.8 (t,  $J = 3.8$  Hz), 129.5, 129.0, 128.7 (t,  $J = 3.1$  Hz), 127.8, 127.3, 127.1, 118.7, 114.0, 88.8 (dd,  $J = 21.2, 14.9$  Hz), 66.8, 66.6, 51.7, 46.0, 42.5, 31.3;  $^{19}\text{F}$  NMR (376 MHz,  $\text{CDCl}_3$ )  $\delta$  -88.14 (d,  $J = 36.5$  Hz), -88.44 (d,  $J = 36.5$  Hz); IR (neat):  $\nu_{\text{max}}$  ( $\text{cm}^{-1}$ ) 3386, 2956, 1732, 1603, 1372, 1168, 1018, 749  $\text{cm}^{-1}$ ; HRMS (ESI) calcd for  $\text{C}_{27}\text{H}_{27}\text{F}_2\text{N}_2\text{O}_2$   $[\text{M}+\text{H}]^+$  449.2035, found 449.2032.

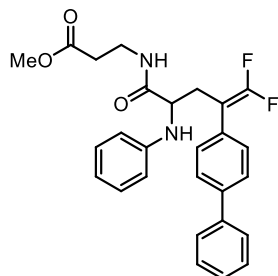

**Methyl 3-(4-([1,1'-biphenyl]-4-yl)-5,5-difluoro-2-(phenylamino)pent-4-enamido)propanoate (3o).**

white solid (75%, 69.6 mg); m.p.: 147-148 °C;  $R_f = 0.5$  (petroleum ether/ethyl acetate = 8:1);  $^1\text{H}$  NMR (400 MHz,  $\text{CDCl}_3$ )  $\delta$  7.60 – 7.57 (m, 4H), 7.45 (t,  $J = 7.2$  Hz, 2H), 7.37 (t,  $J = 5.6$  Hz, 3H), 7.14 (t,  $J = 8.4$  Hz, 2H), 6.78 (t,  $J = 7.2$  Hz, 1H), 6.46 (d,  $J = 7.6$  Hz, 2H), 3.91 (s, 1H), 3.74 – 3.72 (m, 1H), 3.53 (s, 3H), 3.51 – 3.41 (m, 2H), 3.17 – 3.13 (m, 1H), 2.90 – 2.84 (m, 1H), 2.45 (t,  $J = 6.0$  Hz, 2H);  $^{13}\text{C}$  NMR (100 MHz,  $\text{CDCl}_3$ )  $\delta$  172.6, 172.4, 154.6 (dd,  $J = 290.8, 286.5$  Hz), 146.3, 140.8, 140.4, 131.0 (t,  $J = 3.7$  Hz), 129.4, 128.9, 127.5, 127.1, 119.3, 113.7, 89.2 (dd,  $J = 20.7, 15.3$  Hz), 57.9, 51.7, 34.7, 33.7, 31.6;  $^{19}\text{F}$  NMR (376 MHz,  $\text{CDCl}_3$ )  $\delta$  -88.08 (d,  $J = 38.7$  Hz), -89.53 (d,  $J = 39.1$  Hz); IR (neat):  $\nu_{\text{max}}$  ( $\text{cm}^{-1}$ ) 3394, 2958, 2870, 1739, 1604, 1072, 1023, 952  $\text{cm}^{-1}$ ; HRMS (ESI) calcd for  $\text{C}_{27}\text{H}_{27}\text{F}_2\text{N}_2\text{O}_2$   $[\text{M}+\text{H}]^+$  465.1984, found 465.1976.

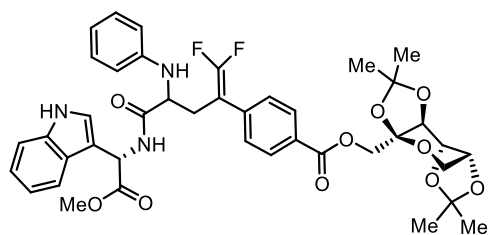

**((3a*S*,5a*R*,8a*R*,8b*S*)-2,2,7,7-Tetramethyltetrahydro-3a*H*-bis([1,3]dioxolo)[4,5-*b*:4',5'-*d*]pyran-3a-*y*l)methyl-4-(5-(((*S*)-1-(1*H*-indol-3-yl)-2-methoxy-2-oxoethyl)amino)-1,1-difluoro-5-oxo-4-(phenylamino)pent-1-en-2-yl)benzoate (3p).**

white solid (63%, 97.7 mg, d.r. = 1:1); m.p.: 210-211 °C;  $R_f$  = 0.5 (petroleum ether/ethyl acetate = 2:1);  $^1\text{H}$  NMR (400 MHz,  $\text{CDCl}_3$ )  $\delta$  8.61 (s, 0.5H), 8.22 (s, 0.5H), 7.99 (dd,  $J$  = 13.2, 8.0 Hz, 2H), 7.52 (d,  $J$  = 8.0 Hz, 0.5H), 7.40 (dd,  $J$  = 8.0, 4.4 Hz, 0.5H), 7.32 – 7.28 (m, 1.5H), 7.24 – 7.20 (m, 1.5H), 7.16 – 7.12 (m, 3H), 7.07 – 6.98 (m, 1H), 6.87 – 6.77 (m, 2H), 6.42 – 6.36 (m, 2H), 4.92 – 4.89 (m, 0.5H), 4.86 – 4.81 (m, 0.5H), 4.75 (dd,  $J$  = 11.6, 8.4 Hz, 1H), 4.70 (d,  $J$  = 7.6 Hz, 1H), 4.49 (s, 1H), 4.38 (d,  $J$  = 11.6 Hz, 0.5H), 4.31 (d,  $J$  = 8.0 Hz, 0.5H), 4.16 (q,  $J$  = 7.2 Hz, 1H), 4.01 (d,  $J$  = 12.8 Hz, 0.5H), 3.85 (d,  $J$  = 13.2 Hz, 0.5H), 3.71 (s, 1.5H), 3.67 (s, 1.5H), 3.36 – 3.28 (m, 2H), 3.15 (dd,  $J$  = 14.8, 4.8 Hz, 1H), 3.08 (d,  $J$  = 15.2 Hz, 0.5H), 2.93 (d,  $J$  = 23.2 Hz, 0.5H), 2.82 (dd,  $J$  = 13.2, 10.0 Hz, 0.5H), 2.66 (dd,  $J$  = 13.2, 8.8 Hz, 0.5H), 2.08 (s, 1H), 1.60 (s, 3H), 1.50 (s, 3H), 1.42 (d,  $J$  = 4.8 Hz, 3H), 1.40 (s, 1H), 1.30 (t,  $J$  = 7.2 Hz, 3H);  $^{13}\text{C}$  NMR (100 MHz,  $\text{CDCl}_3$ )  $\delta$  172.1, 172.0, 171.9, 171.8, 171.3, 165.5, 165.5, 154.7 (t,  $J$  = 288.0 Hz), 154.6 (t,  $J$  = 286.4 Hz), 146.3, 146.2, 137.2 (t,  $J$  = 4.1 Hz), 136.2, 136.1, 130.1, 130.0, 129.4, 129.3, 129.2, 129.0, 128.5 (t,  $J$  = 2.8 Hz), 128.3 (t,  $J$  = 2.6 Hz), 127.7, 127.2, 123.1, 122.9, 122.3, 122.1, 119.6, 119.5, 119.4, 119.3, 118.4, 118.4, 114.0, 113.7, 111.6, 111.3, 109.6, 109.2, 109.1, 109.0, 108.9, 101.7, 101.6, 89.1 (dd,  $J$  = 21.4, 15.1 Hz), 89.0 (dd,  $J$  = 21.6, 15.0 Hz), 70.8, 70.7, 70.6, 70.1, 65.8, 65.6, 61.4, 60.5, 57.8, 57.5, 53.1, 52.4, 52.4, 52.2, 31.5, 31.1, 27.5, 27.3, 26.6, 25.9, 25.6, 24.0, 21.1, 14.2;  $^{19}\text{F}$  NMR (376 MHz,  $\text{CDCl}_3$ )  $\delta$  -86.41 (d,  $J$  = 34.6 Hz), -86.64 (d,  $J$  = 33.8 Hz), -87.74 (d,  $J$  = 12.0 Hz), -87.83 (d,  $J$  = 12.4 Hz); IR (neat):  $\nu_{\text{max}}$  ( $\text{cm}^{-1}$ ) 3376, 2983, 1718, 1603, 1496, 1408, 1277, 1189, 1156, 1089, 1026  $\text{cm}^{-1}$ ; HRMS (ESI) calcd for  $\text{C}_{41}\text{H}_{44}\text{F}_2\text{N}_3\text{O}_{10}$   $[\text{M}+\text{H}]^+$  776.2989, found 776.2927.

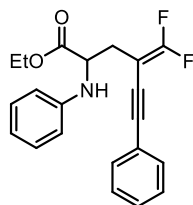

**Ethyl 4-(difluoromethylene)-6-phenyl-2-(phenylamino)hex-5-ynoate (5a).**

colorless oil (93%, 60.1 mg);  $R_f$  = 0.6 (petroleum ether/ethyl acetate = 20:1);  $^1\text{H}$  NMR (400 MHz,  $\text{CDCl}_3$ )  $\delta$  7.49 – 7.45 (m, 2H), 7.38 – 7.32 (m, 3H), 7.21 (t,  $J$  = 8.4 Hz, 2H), 6.79 (t,  $J$  = 7.2 Hz, 1H), 6.72 (d,  $J$  = 8.4 Hz, 2H), 4.41 (t,  $J$  = 6.4 Hz, 1H), 4.23 (q,  $J$  = 7.2 Hz, 2H), 2.78 – 2.66 (m, 2H), 1.28 (t,  $J$  = 7.2 Hz, 3H);  $^{13}\text{C}$  NMR (100 MHz,  $\text{CDCl}_3$ )  $\delta$  172.8, 159.7 (dd,  $J$  = 295.9, 293.2 Hz), 146.4, 131.6, 129.5, 128.5, 128.5, 122.6, 118.7, 113.8, 94.4 (t,  $J$  = 5.7 Hz), 80.4 (dd,  $J$  = 7.6, 4.3 Hz), 75.3 (dd,  $J$  = 34.0,

17.7 Hz), 61.7, 55.4, 30.8, 14.2;  $^{19}\text{F}$  NMR (376 MHz,  $\text{CDCl}_3$ )  $\delta$  -77.29 (d,  $J = 11.3$  Hz), -83.11 (d,  $J = 11.3$  Hz); IR (neat):  $\nu_{\text{max}}$  ( $\text{cm}^{-1}$ ) 3385, 2983, 2875, 1716, 1599, 1491, 1016, 816  $\text{cm}^{-1}$ ; HRMS (ESI) calcd for  $\text{C}_{25}\text{H}_{24}\text{F}_2\text{NO}_2$   $[\text{M}+\text{H}]^+$  324.1205, found 324.1197.

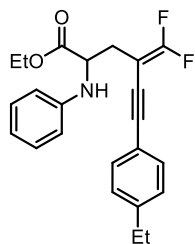

**Ethyl 4-(difluoromethylene)-6-(4-ethylphenyl)-2-(phenylamino)hex-5-ynoate (5b).**

colorless oil (84%, 64.3 mg);  $R_f = 0.5$  (petroleum ether/ethyl acetate = 25:1);  $^1\text{H}$  NMR (400 MHz,  $\text{CDCl}_3$ )  $\delta$  7.36 (d,  $J = 8.0$  Hz, 2H), 7.23 – 7.13 (m, 4H), 6.76 (t,  $J = 7.3$  Hz, 1H), 6.69 (d,  $J = 7.9$  Hz, 2H), 4.37 (t,  $J = 6.4$  Hz, 1H), 4.20 (q,  $J = 7.2$  Hz, 2H), 2.69 – 2.63 (m, 4H), 1.28 – 1.23 (m, 6H);  $^{13}\text{C}$  NMR (100 MHz,  $\text{CDCl}_3$ )  $\delta$  172.9, 159.7 (dd,  $J = 295.5, 292.7$  Hz), 146.4, 145.3, 131.6, 129.5, 128.1, 119.9, 118.7, 113.8, 94.7 (t,  $J = 5.6$  Hz), 79.7 (dd,  $J = 7.8, 4.4$  Hz), 75.4 (dd,  $J = 34.0, 17.8$  Hz), 61.7, 55.4, 31.0, 28.9, 15.5, 14.2;  $^{19}\text{F}$  NMR (376 MHz,  $\text{CDCl}_3$ )  $\delta$  -77.68 (d,  $J = 12.2$  Hz), -83.60 (d,  $J = 12.2$  Hz); IR (neat):  $\nu_{\text{max}}$  ( $\text{cm}^{-1}$ ) 3388, 2983, 1715, 1595, 1275, 1194, 1076, 909  $\text{cm}^{-1}$ ; HRMS (ESI) calcd for  $\text{C}_{23}\text{H}_{24}\text{F}_2\text{NO}_2$   $[\text{M}+\text{H}]^+$  384.1770, found 384.1767.

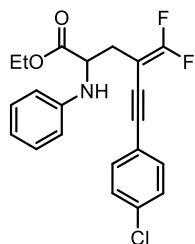

**Ethyl 6-(4-chlorophenyl)-4-(difluoromethylene)-2-(phenylamino)hex-5-ynoate (5c).**

colorless oil (87%, 67.7 mg);  $R_f = 0.5$  (petroleum ether/ethyl acetate = 20:1);  $^1\text{H}$  NMR (400 MHz,  $\text{CDCl}_3$ )  $\delta$  7.32 – 7.29 (m, 4H), 7.18 (t,  $J = 8.4$  Hz, 2H), 6.76 (t,  $J = 7.2$  Hz, 1H), 6.67 (d,  $J = 7.6$  Hz, 2H), 4.35 (t,  $J = 6.4$  Hz, 1H), 4.24 – 4.15 (m, 2H), 2.72 – 2.64 (m, 2H), 1.26 (t,  $J = 7.2$  Hz, 3H);  $^{13}\text{C}$  NMR (100 MHz,  $\text{CDCl}_3$ )  $\delta$  172.6, 159.7 (dd,  $J = 295.8, 295.2$  Hz), 146.2, 134.7, 132.7, 129.4, 128.8, 121.0, 118.6, 113.6, 93.2 (t,  $J = 5.6$  Hz), 81.4 (dd,  $J = 7.5, 4.4$  Hz), 75.0 (dd,  $J = 34.1, 17.6$  Hz), 61.6, 55.3, 30.7, 14.1;  $^{19}\text{F}$  NMR (376 MHz,  $\text{CDCl}_3$ )  $\delta$  -76.74 (d,  $J = 9.8$  Hz), -82.44 (d,  $J = 9.8$  Hz); IR (neat):  $\nu_{\text{max}}$  ( $\text{cm}^{-1}$ ) 3394, 2982, 1715, 1601, 1371, 1274, 1087, 916  $\text{cm}^{-1}$ ; HRMS (ESI) calcd for  $\text{C}_{21}\text{H}_{19}\text{ClF}_2\text{NO}_2$   $[\text{M}+\text{H}]^+$  390.1067, found 390.1075.

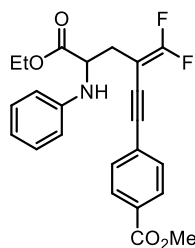

**Methyl 4-(3-(difluoromethylene)-6-ethoxy-6-oxo-5-(phenylamino)hex-1-yn-1-yl)benzoate (5d).**

colorless oil (69%, 58.9 mg);  $R_f = 0.5$  (petroleum ether/ethyl acetate = 10:1);  $^1\text{H NMR}$  (400 MHz,  $\text{CDCl}_3$ )  $\delta$  8.00 (d,  $J = 8.4$  Hz, 2H), 7.47 (d,  $J = 8.4$  Hz, 2H), 7.18 (t,  $J = 7.6$  Hz, 2H), 6.77 (t,  $J = 7.2$  Hz, 1H), 6.68 (d,  $J = 7.6$  Hz, 2H), 4.37 (q,  $J = 6.4$  Hz, 1H), 4.21 (t,  $J = 7.2$  Hz, 2H), 3.93 (s, 3H), 2.71 (s, 2H), 1.25 (t,  $J = 7.2$  Hz, 3H);  $^{13}\text{C NMR}$  (100 MHz,  $\text{CDCl}_3$ )  $\delta$  172.7, 166.6, 159.9 (dd,  $J = 296.9, 294.1$  Hz), 146.3, 131.4, 129.9, 129.6, 129.5, 127.3, 118.8, 113.7, 93.6 (t,  $J = 5.8$  Hz), 83.4 (dd,  $J = 7.8, 4.3$  Hz), 75.2 (dd,  $J = 34.3, 17.5$  Hz), 61.7, 55.3, 52.4, 30.7, 14.2;  $^{19}\text{F NMR}$  (376 MHz,  $\text{CDCl}_3$ )  $\delta$  -76.00 (d,  $J = 7.9$  Hz), -81.64 (d,  $J = 7.9$  Hz); IR (neat):  $\nu_{\text{max}}$  ( $\text{cm}^{-1}$ ) 3392, 3054, 1630, 1523, 1491, 1274, 1023, 863  $\text{cm}^{-1}$ ; HRMS (ESI) calcd for  $\text{C}_{24}\text{H}_{24}\text{F}_2\text{NO}_4$   $[\text{M}+\text{H}]^+$  428.1667, found 428.1646.

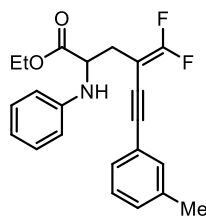

**Ethyl 4-(difluoromethylene)-2-(phenylamino)-6-(m-tolyl)hex-5-ynoate (5e).**

colorless oil (89%, 65.7 mg);  $R_f = 0.5$  (petroleum ether/ethyl acetate = 25:1);  $^1\text{H NMR}$  (400 MHz,  $\text{CDCl}_3$ )  $\delta$  7.24 – 7.23 (m, 2H), 7.20 (d,  $J = 7.2$  Hz, 1H), 7.16 (d,  $J = 8.0$  Hz, 2H), 6.75 (t,  $J = 7.6$  Hz, 1H), 6.68 (d,  $J = 8.0$  Hz, 2H), 4.37 (t,  $J = 6.4$  Hz, 1H), 4.27 – 4.12 (m, 3H), 2.68 (d,  $J = 5.6$  Hz, 2H), 2.33 (s, 3H), 1.25 (t,  $J = 7.2$  Hz, 3H);  $^{13}\text{C NMR}$  (100 MHz,  $\text{CDCl}_3$ )  $\delta$  172.8, 159.7 (dd,  $J = 295.7, 292.9$  Hz), 146.4, 138.2, 132.2, 129.7, 129.5, 128.6, 128.4, 122.5, 118.7, 113.8, 94.7 (t,  $J = 5.7$  Hz), 80.0 (dd,  $J = 7.6, 4.2$  Hz), 75.3 (dd,  $J = 34.0, 17.7$  Hz), 61.7, 55.4, 31.0, 21.3, 14.2;  $^{19}\text{F NMR}$  (376 MHz,  $\text{CDCl}_3$ )  $\delta$  -77.47 (d,  $J = 11.7$  Hz), -83.32 (d,  $J = 11.7$  Hz); IR (neat):  $\nu_{\text{max}}$  ( $\text{cm}^{-1}$ ) 3547, 3165, 2821, 2293, 1631, 1174, 1035, 919  $\text{cm}^{-1}$ ; HRMS (ESI) calcd for  $\text{C}_{22}\text{H}_{22}\text{F}_2\text{NO}_4$   $[\text{M}+\text{H}]^+$  370.1613, found 370.1605.

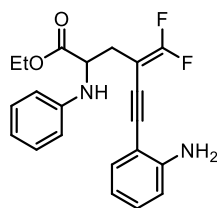

**Ethyl 6-(2-aminophenyl)-4-(difluoromethylene)-2-(phenylamino)hex-5-ynoate (5f).**

yellow oil (76%, 56.2 mg);  $R_f = 0.6$  (petroleum ether/ethyl acetate = 15:1);  $^1\text{H NMR}$  (400 MHz,  $\text{CDCl}_3$ )  $\delta$  7.38 – 7.36 (m, 1H), 7.31 – 7.22 (m, 3H), 6.87 (t,  $J = 7.2$  Hz, 1H), 6.81 – 6.78 (m, 4H), 4.49 – 4.39 (m, 3H), 4.31 (q,  $J = 7.2$  Hz, 2H), 2.82 (s, 2H), 1.36 (t,  $J = 7.2$  Hz, 3H);  $^{13}\text{C NMR}$  (100 MHz,  $\text{CDCl}_3$ )  $\delta$  172.9, 159.5 (dd,  $J = 295.1$ , 293.7 Hz), 148.1, 146.3, 132.1, 130.2, 129.5, 118.8, 117.9, 114.5, 113.8, 107.1, 91.3 (t,  $J = 5.7$  Hz), 85.3 (dd,  $J = 7.6$ , 4.3 Hz), 75.3 (dd,  $J = 33.9$ , 17.8 Hz), 61.8, 55.5, 30.9, 14.2;  $^{19}\text{F NMR}$  (376 MHz,  $\text{CDCl}_3$ )  $\delta$  -77.48 (d,  $J = 11.3$  Hz), -83.49 (d,  $J = 11.3$  Hz); IR (neat):  $\nu_{\text{max}}$  ( $\text{cm}^{-1}$ ) 3384, 3009, 2881, 2253, 1718, 1276, 1032, 958, 833  $\text{cm}^{-1}$ ; HRMS (ESI) calcd for  $\text{C}_{21}\text{H}_{21}\text{F}_2\text{N}_2\text{O}_2$   $[\text{M}+\text{H}]^+$  371.1566, found 371.1559.

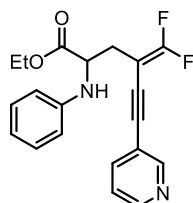

**Ethyl 4-(difluoromethylene)-2-(phenylamino)-6-(pyridin-3-yl)hex-5-ynoate (5g).**

yellow oil (52%, 37.0 mg);  $R_f = 0.5$  (petroleum ether/ethyl acetate = 20:1);  $^1\text{H NMR}$  (400 MHz,  $\text{CDCl}_3$ )  $\delta$  8.66 (s, 1H), 8.57 (d,  $J = 4.8$  Hz, 1H), 7.70 (d,  $J = 7.6$  Hz, 1H), 7.30 – 7.27 (m, 1H), 7.20 (t,  $J = 7.2$  Hz, 2H), 6.78 (t,  $J = 7.2$  Hz, 1H), 6.69 (d,  $J = 8.0$  Hz, 2H), 4.39 (s, 1H), 4.25 – 4.21 (m, 2H), 2.73 (s, 2H), 1.28 (t,  $J = 7.2$  Hz, 3H);  $^{13}\text{C NMR}$  (100 MHz,  $\text{CDCl}_3$ )  $\delta$  172.7, 160.0 (dd,  $J = 296.9$ , 294.2 Hz), 152.1, 149.0, 146.3, 138.5, 129.5, 123.2, 119.9, 118.8, 113.7, 90.9 (t,  $J = 5.7$  Hz), 83.8 (dd,  $J = 7.9$ , 4.4 Hz), 75.0 (dd,  $J = 34.3$ , 17.5 Hz), 61.7, 55.3, 30.7, 14.2;  $^{19}\text{F NMR}$  (376 MHz,  $\text{CDCl}_3$ )  $\delta$  -75.91 (d,  $J = 7.9$  Hz), -81.54 (d,  $J = 7.9$  Hz); IR (neat):  $\nu_{\text{max}}$  ( $\text{cm}^{-1}$ ) 3386, 2860, 2253, 1603, 1443, 1274, 1086, 997, 877  $\text{cm}^{-1}$ ; HRMS (ESI) calcd for  $\text{C}_{20}\text{H}_{19}\text{F}_2\text{N}_2\text{O}_2$   $[\text{M}+\text{H}]^+$  357.1409, found 357.1414.

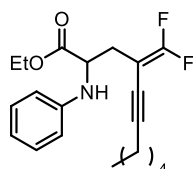

**Ethyl 4-(difluoromethylene)-2-(phenylamino)undec-5-ynoate (5h).**

colorless oil (66%, 46.1mg);  $R_f = 0.6$  (petroleum ether/ethyl acetate = 30:1);  $^1\text{H NMR}$  (400 MHz,  $\text{CDCl}_3$ )  $\delta$  7.17 (t,  $J = 8.4$  Hz, 2H), 6.75 (t,  $J = 7.6$  Hz, 1H), 6.66 (d,  $J = 8.0$  Hz, 2H), 4.29 (t,  $J = 7.2$  Hz, 1H), 4.19 (q,  $J = 7.2$  Hz, 2H), 2.55 (d,  $J = 6.4$  Hz, 2H), 2.33 (t,  $J = 7.2$  Hz, 2H), 1.59 – 1.52 (m, 2H), 1.40 – 1.30 (m, 6H), 1.26 (t,  $J = 7.2$  Hz, 3H), 0.91 (t,  $J = 6.8$  Hz, 3H);  $^{13}\text{C NMR}$  (100 MHz,  $\text{CDCl}_3$ )  $\delta$  173.0, 160.0 (dd,  $J =$

293.6, 290.8 Hz), 146.6, 129.4, 118.7, 113.8, 96.0 (t,  $J = 5.4$  Hz), 75.2 (dd,  $J = 33.5$ , 18.2 Hz), 71.4 (dd,  $J = 7.5$ , 3.9 Hz), 61.6, 55.4, 31.3, 31.2, 28.4, 22.3, 19.6, 14.2, 14.1;  $^{19}\text{F}$  NMR (376 MHz,  $\text{CDCl}_3$ )  $\delta$  -80.14 (d,  $J = 17.8$  Hz), -85.64 (d,  $J = 17.8$  Hz); IR (neat):  $\nu_{\text{max}}$  ( $\text{cm}^{-1}$ ) 3387, 3056, 1717, 1603, 1275, 1180, 995, 874  $\text{cm}^{-1}$ ; HRMS (ESI) calcd for  $\text{C}_{20}\text{H}_{26}\text{F}_2\text{NO}_2$   $[\text{M}+\text{H}]^+$  350.1926, found 350.1918.

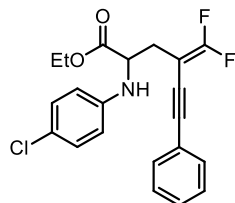

**Ethyl 2-((4-chlorophenyl)amino)-4-(difluoromethylene)-6-phenylhex-5-ynoate (5i).**

colorless oil (81%, 63.0 mg);  $R_f = 0.5$  (petroleum ether/ethyl acetate = 30:1);  $^1\text{H}$  NMR (400 MHz,  $\text{CDCl}_3$ )  $\delta$  7.43 – 7.41 (m, 2H), 7.35 (s, 3H), 7.12 (d,  $J = 8.4$  Hz, 2H), 6.60 (d,  $J = 8.8$  Hz, 2H), 4.37 – 4.29 (m, 2H), 4.20 (q,  $J = 7.2$ , 2H), 2.68 (s, 2H), 1.26 (t,  $J = 7.2$  Hz, 3H);  $^{13}\text{C}$  NMR (100 MHz,  $\text{CDCl}_3$ )  $\delta$  172.5, 159.7 (dd,  $J = 296.1$ , 293.4 Hz), 145.0, 131.6, 129.4, 128.9, 128.6, 123.3, 122.5, 114.9, 94.5 (t,  $J = 5.8$  Hz), 80.2 (dd,  $J = 7.9$ , 4.6 Hz), 75.1 (dd,  $J = 34.0$ , 17.8 Hz), 61.9, 55.5, 30.8, 14.2;  $^{19}\text{F}$  NMR (376 MHz,  $\text{CDCl}_3$ )  $\delta$  -76.99 (d,  $J = 10.8$  Hz), -82.94 (d,  $J = 10.7$  Hz); IR (neat):  $\nu_{\text{max}}$  ( $\text{cm}^{-1}$ ) 3387, 3058, 2942, 1716, 1443, 1277, 1082, 885  $\text{cm}^{-1}$ ; HRMS (ESI) calcd for  $\text{C}_{21}\text{H}_{19}\text{ClF}_2\text{NO}_2$   $[\text{M}+\text{H}]^+$  390.1067, found 390.1075.

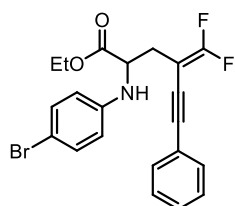

**Ethyl 2-((4-bromophenyl)amino)-4-(difluoromethylene)-6-phenylhex-5-ynoate (5j).**

colorless oil (83%, 71.9 mg);  $R_f = 0.4$  (petroleum ether/ethyl acetate = 30:1);  $^1\text{H}$  NMR (400 MHz,  $\text{CDCl}_3$ )  $\delta$  7.38 – 7.36 (m, 2H), 7.30 – 7.28 (m, 3H), 7.21 (d,  $J = 8.8$  Hz, 2H), 6.51 (d,  $J = 8.8$  Hz, 2H), 4.28 (t,  $J = 6.0$  Hz, 1H), 4.16 (q,  $J = 7.2$  Hz, 2H), 2.66 – 2.62 (m, 2H), 1.21 (t,  $J = 7.2$  Hz, 3H);  $^{13}\text{C}$  NMR (100 MHz,  $\text{CDCl}_3$ )  $\delta$  172.4, 159.7 (dd,  $J = 296.1$ , 293.5 Hz), 145.4, 132.2, 131.5, 128.8, 128.5, 122.5, 115.3, 110.3, 94.5 (t,  $J = 5.6$  Hz), 80.2 (dd,  $J = 7.6$ , 4.2 Hz), 75.1 (dd,  $J = 33.9$ , 17.7 Hz), 61.7, 55.3, 30.7, 14.2;  $^{19}\text{F}$  NMR (376 MHz,  $\text{CDCl}_3$ )  $\delta$  -76.92 (d,  $J = 10.9$  Hz), -82.84 (d,  $J = 10.9$  Hz); IR (neat):  $\nu_{\text{max}}$  ( $\text{cm}^{-1}$ ) 3546, 3165, 2943, 2293, 1632, 1376, 1035, 919  $\text{cm}^{-1}$ ; HRMS (ESI) calcd for  $\text{C}_{21}\text{H}_{19}\text{BrF}_2\text{NO}_2$   $[\text{M}+\text{H}]^+$  434.0517, found 434.0545.

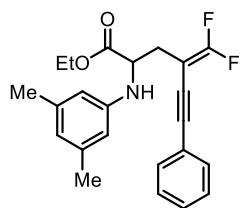

**Ethyl 4-(difluoromethylene)-2-((3,5-dimethylphenyl)amino)-6-phenylhex-5-ynoate (5k).**

colorless oil (86%, 65.9 mg);  $R_f = 0.5$  (petroleum ether/ethyl acetate = 30:1);  $^1\text{H NMR}$  (400 MHz,  $\text{CDCl}_3$ )  $\delta$  7.48 – 7.46 (m, 2H), 7.36 – 7.34 (m, 3H), 6.44 (s, 1H), 6.34 (s, 2H), 4.39 (t,  $J = 6.4$  Hz, 1H), 4.26 – 4.18 (m, 3H), 2.69 (d,  $J = 6.4$  Hz, 2H), 2.22 (s, 6H), 1.28 (t,  $J = 7.2$  Hz, 3H);  $^{13}\text{C NMR}$  (100 MHz,  $\text{CDCl}_3$ )  $\delta$  173.0, 159.7 (dd,  $J = 295.8, 293.5$  Hz), 146.5, 139.1, 131.6, 128.7, 128.5, 122.6, 120.7, 111.7, 94.4 (t,  $J = 5.7$  Hz), 80.5 (dd,  $J = 7.7, 4.0$  Hz), 75.4 (dd,  $J = 34.0, 17.6$  Hz), 61.6, 55.4, 31.0, 21.6, 14.2;  $^{19}\text{F NMR}$  (376 MHz,  $\text{CDCl}_3$ )  $\delta$  -77.26 (d,  $J = 11.7$  Hz), -83.10 (d,  $J = 11.7$  Hz); IR (neat):  $\nu_{\text{max}}$  ( $\text{cm}^{-1}$ ) 3547, 3003, 2864, 2293, 1645, 1493, 1116, 1035, 919  $\text{cm}^{-1}$ ; HRMS (ESI) calcd for  $\text{C}_{23}\text{H}_{24}\text{F}_2\text{NO}_2$   $[\text{M}+\text{H}]^+$  384.1770, found 384.1768.

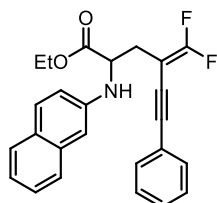

**Ethyl 4-(difluoromethylene)-2-(naphthalen-2-ylamino)-6-phenylhex-5-ynoate (5l).**

colorless oil (75%, 60.8 mg);  $R_f = 0.6$  (petroleum ether/ethyl acetate = 20:1);  $^1\text{H NMR}$  (400 MHz,  $\text{CDCl}_3$ )  $\delta$  7.68 (dd,  $J = 14.4, 8.0$  Hz, 2H), 7.57 (d,  $J = 8.4$  Hz, 1H), 7.48 – 7.45 (m, 2H), 7.39 – 7.33 (m, 4H), 7.24 (t,  $J = 7.2$  Hz, 1H), 6.97 (dd,  $J = 8.8, 2.4$  Hz, 1H), 6.92 (d,  $J = 2.0$  Hz, 1H), 4.55 (t,  $J = 6.0$  Hz, 1H), 4.29 – 4.20 (m, 2H), 2.80 – 2.78 (m, 2H), 1.29 (t,  $J = 7.2$  Hz, 3H);  $^{13}\text{C NMR}$  (100 MHz,  $\text{CDCl}_3$ )  $\delta$  172.7, 159.8 (dd,  $J = 296.0, 293.5$  Hz), 144.0, 135.0, 131.6, 129.3, 128.8, 128.5, 128.1, 127.7, 126.5, 126.2, 122.6, 118.3, 105.7, 94.5 (t,  $J = 5.8$  Hz), 80.4 (dd,  $J = 7.5, 4.0$  Hz), 75.3 (dd,  $J = 34.2, 17.9$  Hz), 61.8, 55.3, 30.6, 14.2;  $^{19}\text{F NMR}$  (376 MHz,  $\text{CDCl}_3$ )  $\delta$  -77.01 (d,  $J = 11.3$  Hz), -82.86 (d,  $J = 11.3$  Hz); IR (neat):  $\nu_{\text{max}}$  ( $\text{cm}^{-1}$ ) 3362, 2944, 2409, 2253, 1661, 1198, 1033, 995  $\text{cm}^{-1}$ ; HRMS (ESI) calcd for  $\text{C}_{25}\text{H}_{22}\text{F}_2\text{NO}_2$   $[\text{M}+\text{H}]^+$  406.1613, found 406.1611.

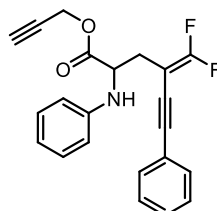

**Prop-2-yn-1-yl 4-(difluoromethylene)-6-phenyl-2-(phenylamino)hex-5-ynoate (5m).**

colorless oil (77%, 56.2 mg);  $R_f = 0.6$  (petroleum ether/ethyl acetate = 25:1);  $^1\text{H NMR}$  (400 MHz,  $\text{CDCl}_3$ )  $\delta$  7.46 – 7.43 (m, 2H), 7.35 – 7.33 (m, 3H), 7.21 – 7.17 (m, 2H), 6.78 (t,  $J = 7.2$  Hz, 1H), 6.69 (d,  $J = 7.6$  Hz, 2H), 4.73 (t,  $J = 2.4$  Hz, 1H), 4.45 (dd,  $J$



= 14.8, 6.4 Hz, 1H), 4.30 (d,  $J = 8.4$  Hz, 1H), 2.74 – 2.71 (m, 2H), 2.48 (t,  $J = 2.4$  Hz, 1H);  $^{13}\text{C}$  NMR (100 MHz,  $\text{CDCl}_3$ )  $\delta$  172.2, 159.8 (dd,  $J = 295.9, 292.0$  Hz), 146.3, 131.6, 129.6, 128.8, 128.5, 122.6, 119.0, 113.9, 94.6 (t,  $J = 5.0$  Hz), 80.2 (dd,  $J = 17.8, 9.5$  Hz), 75.6, 75.0 (dd,  $J = 34.2, 17.3$  Hz), 55.4, 53.0, 30.9;  $^{19}\text{F}$  NMR (376 MHz,  $\text{CDCl}_3$ )  $\delta$  -76.78 (d,  $J = 10.5$  Hz), -82.62 (d,  $J = 10.5$  Hz); IR (neat):  $\nu_{\text{max}}$  ( $\text{cm}^{-1}$ ) 3460, 2940, 1667, 1427, 1264, 1113, 927  $\text{cm}^{-1}$ ; HRMS (ESI) calcd for  $\text{C}_{22}\text{H}_{18}\text{F}_2\text{NO}_2$   $[\text{M}+\text{H}]^+$  366.1300, found 366.1302.

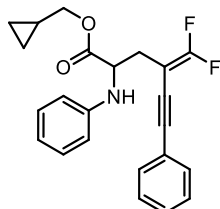

**Cyclopropylmethyl 4-(difluoromethylene)-6-phenyl-2-(phenylamino)hex-5-ynoate (5n).**

colorless oil (73%, 55.6 mg);  $R_f = 0.5$  (petroleum ether/ethyl acetate = 30:1);  $^1\text{H}$  NMR (400 MHz,  $\text{CDCl}_3$ )  $\delta$  7.46 – 7.39 (m, 2H), 7.35 – 7.34 (m, 3H), 7.19 (t,  $J = 7.8$  Hz, 2H), 6.77 (t,  $J = 7.2$  Hz, 1H), 6.71 (d,  $J = 7.6$  Hz, 2H), 4.43 – 4.36 (m, 2H), 4.02 – 3.94 (m, 2H), 2.73 – 2.70 (m, 2H), 1.18 – 1.08 (m, 1H), 0.57 – 0.53 (m, 2H), 0.27 – 0.24 (m, 2H);  $^{13}\text{C}$  NMR (100 MHz,  $\text{CDCl}_3$ )  $\delta$  172.9, 159.6 (dd,  $J = 295.9, 293.2$  Hz), 146.3, 131.5, 129.4, 128.7, 128.4, 122.6, 118.6, 113.7, 94.3 (t,  $J = 5.6$  Hz), 80.3 (dd,  $J = 7.7, 4.2$  Hz), 75.2 (dd,  $J = 34.1, 17.7$  Hz), 70.4, 55.3, 30.9, 9.7, 3.3;  $^{19}\text{F}$  NMR (376 MHz,  $\text{CDCl}_3$ )  $\delta$  -77.24 (d,  $J = 11.2$  Hz), -83.00 (d,  $J = 11.2$  Hz); IR (neat):  $\nu_{\text{max}}$  ( $\text{cm}^{-1}$ ) 3340, 2982, 2831, 1665, 1278, 1023, 755  $\text{cm}^{-1}$ ; HRMS (ESI) calcd for  $\text{C}_{23}\text{H}_{22}\text{F}_2\text{NO}_2$   $[\text{M}+\text{H}]^+$  382.1613, found 382.1623.

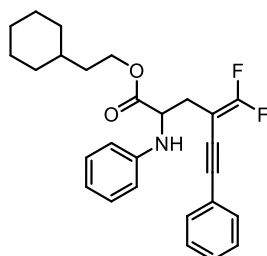

**2-cyclohexylethyl 4-(difluoromethylene)-6-phenyl-2-(phenylamino)hex-5-ynoate (5o).**

colorless oil (81%, 70.8 mg);  $R_f = 0.5$  (petroleum ether/ethyl acetate = 20:1);  $^1\text{H}$  NMR (400 MHz,  $\text{CDCl}_3$ )  $\delta$  7.47 – 7.45 (m, 2H), 7.36 – 7.34 (m, 3H), 7.19 (t,  $J = 7.6$  Hz, 2H), 6.77 (t,  $J = 7.2$  Hz, 1H), 6.70 (d,  $J = 8.0$  Hz, 2H), 5.02 – 4.96 (m, 1H), 4.36 (t,  $J = 6.4$  Hz, 1H), 2.69 (d,  $J = 6.0$  Hz, 2H), 1.91 – 1.82 (m, 2H), 1.68 – 1.60 (m, 3H), 1.55 – 1.53 (m, 3H), 1.44 – 1.39 (m, 2H);  $^{13}\text{C}$  NMR (100 MHz,  $\text{CDCl}_3$ )  $\delta$  172.1, 159.7 (dd,  $J = 296.0, 293.4$  Hz), 146.4, 131.5, 129.4, 128.7, 128.4, 122.6, 118.6, 113.7, 94.4 (t,  $J = 5.7$  Hz), 80.3 (dd,  $J = 7.7, 4.3$  Hz), 76.7, 75.3 (dd,  $J = 34.1, 17.7$  Hz), 55.5, 33.7, 33.6, 30.8, 28.22, 28.18, 22.73, 22.70;  $^{19}\text{F}$  NMR (376 MHz,  $\text{CDCl}_3$ )  $\delta$  -77.41 (d,  $J = 11.9$  Hz), -83.00 (d,  $J = 11.9$  Hz); IR (neat):  $\nu_{\text{max}}$  ( $\text{cm}^{-1}$ ) 3387, 2983, 1715, 1602, 1274, 1183, 1026, 871  $\text{cm}^{-1}$ ; HRMS (ESI) calcd for  $\text{C}_{27}\text{H}_{30}\text{F}_2\text{NO}_2$   $[\text{M}+\text{H}]^+$  438.2239, found 438.2242.

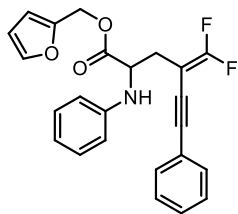

**Furan-2-ylmethyl 4-(difluoromethylene)-6-phenyl-2-(phenylamino)hex-5-ynoate (5p).**

colorless oil (66%, 53.7 mg);  $R_f = 0.5$  (petroleum ether/ethyl acetate = 15:1);  $^1\text{H NMR}$  (400 MHz,  $\text{CDCl}_3$ )  $\delta$  7.45 – 7.42 (m, 3H), 7.35 – 7.33 (m, 3H), 7.18 (t,  $J = 7.6$  Hz, 2H), 6.77 (t,  $J = 7.6$  Hz, 1H), 6.68 (d,  $J = 8.0$  Hz, 2H), 6.38-6.35 (m, 2H), 5.13 (q,  $J = 13.2$  Hz, 2H), 4.42 (t,  $J = 6.4$  Hz, 1H), 2.70 – 2.68 (m, 2H);  $^{13}\text{C NMR}$  (100 MHz,  $\text{CDCl}_3$ )  $\delta$  172.5, 159.7 (dd,  $J = 295.9, 293.3$  Hz), 148.9, 146.3, 143.6, 131.6, 129.5, 128.8, 128.5, 122.6, 118.8, 113.8, 111.2, 110.7, 94.5 (t,  $J = 5.7$  Hz), 80.2 (dd,  $J = 7.7, 4.3$  Hz), 75.1 (dd,  $J = 33.9, 17.9$  Hz), 59.0, 55.4, 30.8;  $^{19}\text{F NMR}$  (376 MHz,  $\text{CDCl}_3$ )  $\delta$  -77.00 (d,  $J = 10.8$  Hz), -82.95 (d,  $J = 10.8$  Hz); IR (neat):  $\nu_{\text{max}}$  ( $\text{cm}^{-1}$ ) 3375, 2970, 2875, 1737, 1680, 1496, 1183, 1033  $\text{cm}^{-1}$ ; HRMS (ESI) calcd for  $\text{C}_{24}\text{H}_{20}\text{F}_2\text{NO}_3$   $[\text{M}+\text{H}]^+$  408.1405, found 408.1423.

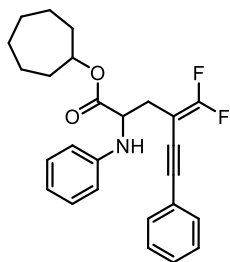

**Cyclohexyl 4-(difluoromethylene)-6-phenyl-2-(phenylamino)hex-5-ynoate (5q).**

colorless oil (78%, 66.0 mg);  $R_f = 0.5$  (petroleum ether/ethyl acetate = 25:1);  $^1\text{H NMR}$  (400 MHz,  $\text{CDCl}_3$ )  $\delta$  7.46 – 7.43 (m, 2H), 7.35 – 7.33 (m, 3H), 7.18 (t,  $J = 8.0$  Hz, 2H), 6.76 (t,  $J = 7.2$  Hz, 1H), 6.69 (d,  $J = 7.6$  Hz, 2H), 4.39 – 4.32 (m, 2H), 4.16 (t,  $J = 8.4$  Hz, 2H), 2.71 – 2.68 (m, 2H), 1.66 – 1.64 (m, 4H), 1.50 (q,  $J = 6.8$  Hz, 2H), 1.29 – 1.22 (m, 2H), 1.20 – 1.15 (m, 2H), 0.93-0.82 (m, 2H);  $^{13}\text{C NMR}$  (100 MHz,  $\text{CDCl}_3$ )  $\delta$  173.0, 159.6 (dd,  $J = 295.6, 292.5$  Hz), 146.4, 131.6, 129.5, 128.8, 128.5, 122.7, 118.7, 113.8, 94.5 (t,  $J = 5.6$  Hz), 80.4 (dd,  $J = 7.7, 4.2$  Hz), 75.3 (dd,  $J = 34.1, 17.7$  Hz), 64.0, 55.5, 36.0, 34.5, 33.2, 31.0, 26.6, 26.2;  $^{19}\text{F NMR}$  (376 MHz,  $\text{CDCl}_3$ )  $\delta$  -77.19 (d,  $J = 10.9$  Hz), -83.10 (d,  $J = 10.9$  Hz); IR (neat):  $\nu_{\text{max}}$  ( $\text{cm}^{-1}$ ) 3347, 3057, 2958, 1745, 1511, 1276, 1033, 916  $\text{cm}^{-1}$ ; HRMS (ESI) calcd for  $\text{C}_{26}\text{H}_{28}\text{F}_2\text{NO}_2$   $[\text{M}+\text{H}]^+$  424.2082, found 424.2083.

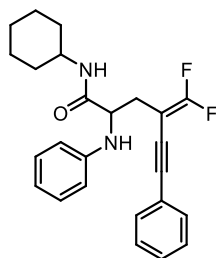

***N*-cyclohexyl-4-(difluoromethylene)-6-phenyl-2-(phenylamino)hex-5-ynamide (5r).**

colorless oil (80%, 51.7 mg);  $R_f = 0.3$  (petroleum ether/ethyl acetate = 3:1);  $^1\text{H}$  NMR (400 MHz,  $\text{CDCl}_3$ )  $\delta$  7.37 – 7.29 (m, 3H), 7.22 – 7.15 (m, 2H), 6.82 (t,  $J = 7.6$  Hz, 1H), 6.74 (d,  $J = 8.0$  Hz, 1H), 6.63 (d,  $J = 8.0$  Hz, 2H), 4.03 – 3.93 (m, 1H), 3.85 – 3.71 (m, 1H), 2.95 – 2.83 (m, 1H), 2.71 – 2.55 (m, 1H), 1.89 – 1.77 (m, 2H), 1.67 – 1.52 (m, 3H), 1.39 – 1.27 (m, 2H), 1.10 – 1.05 (m, 2H), 0.87 – 0.84 (m, 1H);  $^{13}\text{C}$  NMR (100 MHz,  $\text{CDCl}_3$ )  $\delta$  171.0, 159.7 (dd,  $J = 296.6, 294.2$  Hz), 146.5, 131.6, 129.5, 128.9, 128.5, 122.3, 119.6, 114.2, 95.1 (t,  $J = 5.7$  Hz), 80.2 (dd,  $J = 7.6, 4.2$  Hz), 75.5 (dd,  $J = 33.8, 17.1$  Hz), 58.8, 48.2, 33.0, 32.9, 30.7, 25.5, 24.9, 24.8;  $^{19}\text{F}$  NMR (376 MHz,  $\text{CDCl}_3$ )  $\delta$  -76.50 (d,  $J = 8.5$  Hz), -82.14 (d,  $J = 10.1$  Hz); IR (neat):  $\nu_{\text{max}}$  ( $\text{cm}^{-1}$ ) 3697, 3394, 2958, 2208, 1725, 1601, 1277, 1055  $\text{cm}^{-1}$ ; HRMS (ESI) calcd for  $\text{C}_{25}\text{H}_{24}\text{F}_2\text{NO}_2$   $[\text{M}+\text{H}]^+$  324.1205, found 324.1197.

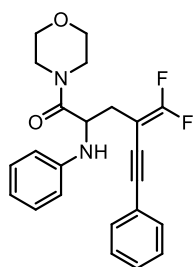

**4-(difluoromethylene)-1-morpholino-6-phenyl-2-(phenylamino)hex-5-yn-1-one (5s).**

yellow solid (80%, 63.4 mg); m.p.: 141-142 °C;  $R_f = 0.4$  (petroleum ether/ethyl acetate = 5:1);  $^1\text{H}$  NMR (400 MHz,  $\text{CDCl}_3$ )  $\delta$  7.46 – 7.44 (m, 2H), 7.38 – 7.36 (m, 3H), 7.19 (t,  $J = 7.6$  Hz, 2H), 6.77 (t,  $J = 7.2$  Hz, 1H), 6.71 (d,  $J = 8.0$  Hz, 2H), 4.67 (t,  $J = 6.4$  Hz, 1H), 3.73 – 3.54 (m, 8H), 2.62 (d,  $J = 6.4$  Hz, 2H);  $^{13}\text{C}$  NMR (100 MHz,  $\text{CDCl}_3$ )  $\delta$  170.7, 159.6 (dd,  $J = 296.2, 294.0$  Hz), 146.5, 131.5, 129.6, 129.0, 128.7, 122.4, 118.8, 114.0, 94.5 (t,  $J = 5.5$  Hz), 80.7 (dd,  $J = 7.8, 4.2$  Hz), 75.3 (dd,  $J = 34.4, 17.1$  Hz), 66.9, 66.7, 51.7, 46.3, 42.7, 31.4;  $^{19}\text{F}$  NMR (376 MHz,  $\text{CDCl}_3$ )  $\delta$  -76.72 (d,  $J = 9.8$  Hz), -82.51 (d,  $J = 9.8$  Hz); IR (neat):  $\nu_{\text{max}}$  ( $\text{cm}^{-1}$ ) 3387, 2983, 1735, 1603, 1234, 1140, 1043, 938  $\text{cm}^{-1}$ ; HRMS (ESI) calcd for  $\text{C}_{23}\text{H}_{23}\text{F}_2\text{N}_2\text{O}_2$   $[\text{M}+\text{H}]^+$  397.1722, found 397.1729.

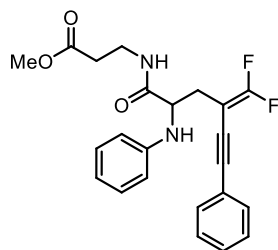

**Methyl 3-(4-(difluoromethylene)-6-phenyl-2-(phenylamino)hex-5-ynamido)propanoate (5t).** colorless oil (82%, 67.6 mg, d.r. = 1:1); m.p.: 111-112 °C;  $R_f$  = 0.3 (petroleum ether/ethyl acetate = 2:1);  $^1\text{H NMR}$  (400 MHz,  $\text{CDCl}_3$ )  $\delta$  7.36 – 7.30 (m, 5H), 7.18 (t,  $J$  = 8.4 Hz, 2H), 6.80 (t,  $J$  = 7.2 Hz, 1H), 6.60 (d,  $J$  = 8.0 Hz, 2H), 4.02 – 3.98 (m, 1H), 3.58 – 3.45 (m, 5H), 2.89 – 2.83 (m, 1H), 2.64 – 2.58 (m, 1H), 2.50 (t,  $J$  = 7.2 Hz, 2H);  $^{13}\text{C NMR}$  (100 MHz,  $\text{CDCl}_3$ )  $\delta$  172.6, 172.1, 159.7 (dd,  $J$  = 296.6, 293.8 Hz), 146.4, 131.6, 129.5, 128.9, 128.5, 122.3, 119.4, 113.9, 95.1 (t,  $J$  = 5.8 Hz), 80.0 (dd,  $J$  = 7.6, 4.3 Hz), 75.5 (dd,  $J$  = 33.8, 17.2 Hz), 58.4, 51.8, 34.9, 33.8, 30.7;  $^{19}\text{F NMR}$  (376 MHz,  $\text{CDCl}_3$ )  $\delta$  -76.45 (d,  $J$  = 10.5 Hz), -82.32 (d,  $J$  = 10.5 Hz); IR (neat):  $\nu_{\text{max}}$  ( $\text{cm}^{-1}$ ) 3373, 2823, 1716, 1933, 1214, 1157, 1031, 856  $\text{cm}^{-1}$ ; HRMS (ESI) calcd for  $\text{C}_{23}\text{H}_{23}\text{F}_2\text{N}_2\text{O}_3$   $[\text{M}+\text{H}]^+$  413.1617, found 413.1606.

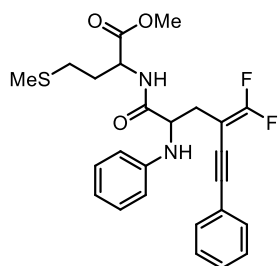

**Methyl (4-(difluoromethylene)-6-phenyl-2-(phenylamino)hex-5-ynoyl)methioninate (5u).** yellow solid (62%, 58.5 mg, d.r. = 1:1); m.p.: 121-122 °C;  $R_f$  = 0.6 (petroleum ether/ethyl acetate = 1:1);  $^1\text{H NMR}$  (400 MHz,  $\text{CDCl}_3$ )  $\delta$  7.51 (d,  $J$  = 8.4 Hz, 0.5H), 7.42 (d,  $J$  = 8.0 Hz, 0.5H), 7.34 – 7.30 (m 5H), 7.19 (t,  $J$  = 8.0 Hz, 2H), 6.81 (t,  $J$  = 7.6 Hz, 1H), 6.65 (dd,  $J$  = 15.2, 8.0 Hz, 2H), 4.77 – 4.67 (m, 1H), 4.37 (s, 1H), 4.11 – 4.06 (m, 1H), 3.69 (s, 1H), 3.65 (s, 1H), 2.92 – 2.83 (m, 1H), 2.71 – 2.63 (m, 1H), 2.46 – 2.42 (m, 1H), 2.33 – 2.29 (m, 1H), 2.16 – 2.08 (m, 1H), 2.01 (s, 1.5H), 1.92 (s, 2.5H);  $^{13}\text{C NMR}$  (100 MHz,  $\text{CDCl}_3$ )  $\delta$  172.2, 172.04, 172.02, 171.7, 159.6 (dd,  $J$  = 296.1, 293.6 Hz), 146.3, 146.3, 131.5, 129.4, 129.4, 128.8, 128.8, 128.4, 128.4, 122.1, 119.5, 114.2, 113.8, 95.0 (t,  $J$  = 5.4 Hz), 80.0 (dd,  $J$  = 9.9, 4.2 Hz), 79.9 (dd,  $J$  = 9.9, 4.2 Hz), 75.3 (dd,  $J$  = 33.9, 17.6 Hz), 75.3 (dd,  $J$  = 33.9, 17.6 Hz), 58.4 (t,  $J$  = 2.2 Hz), 58.3 (t,  $J$  = 2.2 Hz), 52.5, 52.4, 51.6, 51.2, 31.2, 31.2, 30.5, 30.4, 30.0, 29.7, 15.4, 15.2;  $^{19}\text{F NMR}$  (376 MHz, )  $\delta$  -76.54 (dd,  $J$  = 19.6, 9.8 Hz), -82.29 (dd,  $J$  = 26.3, 9.4 Hz); IR (neat):  $\nu_{\text{max}}$  ( $\text{cm}^{-1}$ ) 3358, 2983, 2831, 1716, 1602, 1497, 1190, 1023, 807  $\text{cm}^{-1}$ ; HRMS (ESI) calcd for  $\text{C}_{25}\text{H}_{27}\text{F}_2\text{N}_2\text{O}_3$   $[\text{M}+\text{H}]^+$  473.1705, found 473.1682.

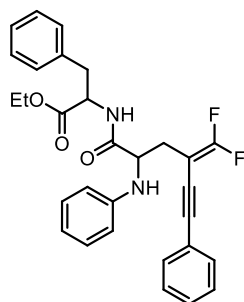

**Ethyl (4-(difluoromethylene)-6-phenyl-2-(phenylamino)hex-5-ynoyl)phenylalaninate (5v).**

white solid (75%, 75.3 mg, d.r. = 1:1); m.p.: 105-106 °C;  $R_f$  = 0.5 (petroleum ether/ethyl acetate = 2:1);  $^1\text{H}$  NMR (400 MHz,  $\text{CDCl}_3$ )  $\delta$  7.30 (s, 5H), 7.21 – 7.12 (m, 4H), 7.07 (t,  $J$  = 7.6 Hz, 2H), 6.88 – 6.82 (m, 3H), 6.56 (d,  $J$  = 8.0 Hz, 2H), 4.94 – 4.89 (m, 1H), 4.13 (q,  $J$  = 14.4, 7.2 Hz, 2H), 4.00 (dd,  $J$  = 10.0, 4.0 Hz, 1H), 3.02 (dd,  $J$  = 29.6, 13.6 Hz, 2H), 2.90 – 2.85 (m, 1H), 2.60 – 2.54 (m, 1H), 1.23 (t,  $J$  = 7.2 Hz, 3H);  $^{13}\text{C}$  NMR (100 MHz,  $\text{CDCl}_3$ )  $\delta$  171.9, 171.3, 159.7 (dd,  $J$  = 298.2.0, 293.3 Hz), 146.5, 135.5, 131.6, 129.6, 129.4, 128.9, 128.6, 128.5, 127.1, 122.3, 119.6, 114.0, 95.2 (t,  $J$  = 4.9 Hz), 79.9 (dd,  $J$  = 14.9, 7.1 Hz), 75.5 (dd,  $J$  = 34.3, 17.9 Hz), 61.7, 58.5, 52.7, 38.1, 30.8, 14.2;  $^{19}\text{F}$  NMR (376 MHz,  $\text{CDCl}_3$ )  $\delta$  -76.26 (d,  $J$  = 10.5 Hz), -82.19 (d,  $J$  = 10.5 Hz); IR (neat):  $\nu_{\text{max}}$  ( $\text{cm}^{-1}$ ) 3381, 2934, 2861, 1719, 1603, 1371, 1253, 1142, 1026, 862  $\text{cm}^{-1}$ ; HRMS (ESI) calcd for  $\text{C}_{30}\text{H}_{29}\text{F}_2\text{N}_2\text{O}_3$   $[\text{M}+\text{H}]^+$  503.2140, found 503.2129.

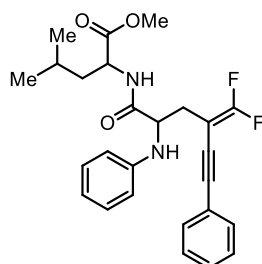

**Methyl (4-(difluoromethylene)-6-phenyl-2-(phenylamino)hex-5-ynoyl)leucinate (5w).**

White solid (71%, 64.5 mg, d.r. = 1:1); m.p.: 80-81°C;  $R_f$  = 0.3 (petroleum ether/ethyl acetate = 2:1);  $^1\text{H}$  NMR (400 MHz,  $\text{CDCl}_3$ )  $\delta$  7.34 – 7.32 (m, 4H), 7.23 – 7.17 (m, 3H), 6.83 (dd,  $J$  = 12.8, 7.2 Hz, 1H), 6.69 (d,  $J$  = 8.0 Hz, 1H), 6.64 (d,  $J$  = 8.0 Hz, 1H), 4.67 – 4.61 (m, 1H), 4.07 (dd,  $J$  = 9.2, 4.4 Hz, 1H), 3.69 (s, 1.5H), 3.65 (s, 1.5H), 2.93 – 2.84 (m, 1H), 2.70 – 2.62 (m, 1H), 1.65 – 1.55 (m, 1.5H), 1.50 – 1.41 (m, 1.5H), 0.90 (d,  $J$  = 6.0 Hz, 2H), 0.88 (d,  $J$  = 6.4 Hz, 2H), 0.81 (d,  $J$  = 6.4 Hz, 2H);  $^{13}\text{C}$  NMR (100 MHz,  $\text{CDCl}_3$ )  $\delta$  173.2, 172.8, 172.1, 172.0, 159.7 (t,  $J$  = 295.3 Hz), 146.5, 146.4, 132.1, 132.0, 131.6, 129.4, 128.9, 128.8, 128.5, 128.4, 122.2, 119.7, 119.6, 114.5, 114.0, 95.1 (t,  $J$  = 5.5 Hz), 80.1 (dd,  $J$  = 11.6, 7.5 Hz), 75.4 (dd,  $J$  = 33.8, 17.4 Hz), 75.3 (dd,  $J$  = 33.8, 17.4 Hz), 75.1, 58.8, 58.5, 57.8, 52.4, 52.3, 50.8, 50.5, 41.3, 41.1, 30.6, 30.5, 25.0, 24.8, 22.9, 21.7, 21.6;  $^{19}\text{F}$  NMR (376 MHz,  $\text{CDCl}_3$ )  $\delta$  -70.78 (dd,  $J$  = 23.5, 8.0 Hz), -71.23 (dd,  $J$  = 15.2, 8.0 Hz), -76.24 (dd,  $J$  = 23.5, 10.3 Hz), -81.99 (dd,  $J$  = 40.9, 10.2 Hz); IR (neat):  $\nu_{\text{max}}$  ( $\text{cm}^{-1}$ ) 3641, 2821, 2349, 1785, 1711, 1581, 1271, 1049, 917  $\text{cm}^{-1}$ ; HRMS (ESI) calcd for  $\text{C}_{26}\text{H}_{29}\text{F}_2\text{N}_2\text{O}_3$   $[\text{M}+\text{H}]^+$  455.2141, found 455.2147.

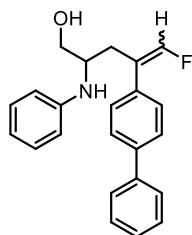

**4-([1,1'-biphenyl]-4-yl)-5-fluoro-2-(phenylamino)pent-4-en-1-ol (6a).**

colorless oil (87%, 60.4 mg,  $Z/E = 1:1$ );  $R_f = 0.4$  (petroleum ether/ethyl acetate = 5:1);  $^1\text{H NMR}$  (400 MHz,  $\text{CDCl}_3$ )  $\delta$  7.63 – 7.58 (m, 4H), 7.48 (t,  $J = 7.2$  Hz, 2H), 7.39 (t,  $J = 7.2$  Hz, 1H), 7.31 (d,  $J = 8.0$  Hz, 2H), 7.16 (t,  $J = 7.6$  Hz, 2H), 6.90 (d,  $J = 85.4$  Hz, 1H), 6.74 (t,  $J = 7.6$  Hz, 1H), 6.56 (d,  $J = 7.6$  Hz, 2H), 3.75 – 3.71 (m, 1H), 3.60 – 3.58 (m, 2H), 2.94 – 2.91 (m, 1H), 2.83 – 2.78 (m, 1H), 2.00 (s, 1H);  $^{13}\text{C NMR}$  (100 MHz,  $\text{CDCl}_3$ )  $\delta$  148.7, 147.3, 146.1, 140.7 (d,  $J = 40.0$  Hz), 134.8 (d,  $J = 9.0$  Hz), 129.4, 129.0, 127.6, 127.4 (d,  $J = 3.0$  Hz), 127.1, 121.8 (d,  $J = 9.0$  Hz), 118.2, 114.0, 64.1, 53.7, 29.0;  $^{19}\text{F NMR}$  (376 MHz,  $\text{CDCl}_3$ )  $\delta$  -128.19 (d,  $J = 85.4$  Hz); IR (neat):  $\nu_{\text{max}}$  ( $\text{cm}^{-1}$ ) 3360, 2982, 1716, 1497, 1478, 1280, 1190, 1023  $\text{cm}^{-1}$ ; HRMS (ESI) calcd for  $\text{C}_{23}\text{H}_{23}\text{FNO}$   $[\text{M}+\text{H}]^+$  348.1758, found 348.1746.

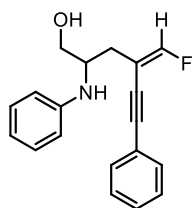

**(Z)-4-(fluoromethylene)-6-phenyl-2-(phenylamino)hex-5-yn-1-ol (7a).**

colorless oil (40%, 23.6 mg);  $R_f = 0.5$  (petroleum ether/ethyl acetate = 5:1);  $^1\text{H NMR}$  (400 MHz,  $\text{CDCl}_3$ )  $\delta$  7.46– 7.43 (m, 2H), 7.37 – 7.35 (m, 3H), 7.21 (t,  $J = 7.6$  Hz, 2H), 7.06 (d,  $J = 83.6$  Hz, 1H), 6.79 – 6.74 (m, 3H), 3.85 (d,  $J = 9.2$  Hz, 2H), 3.72– 3.67 (m, 1H), 2.65 – 2.53 (m, 2H);  $^{13}\text{C NMR}$  (100 MHz,  $\text{CDCl}_3$ )  $\delta$  154.2 (d,  $J = 270.1$  Hz), 147.2, 131.5, 129.5, 128.5, 122.7, 118.1, 113.9, 106.1 (d,  $J = 19.4$  Hz), 91.6 (d,  $J = 9.5$  Hz), 84.3 (d,  $J = 15.1$  Hz), 63.8, 53.6, 29.2;  $^{19}\text{F NMR}$  (376 MHz,  $\text{CDCl}_3$ )  $\delta$  -118.00 (d,  $J = 292.9$  Hz); IR (neat):  $\nu_{\text{max}}$  ( $\text{cm}^{-1}$ ) 3740, 2983, 2821, 2264, 1964, 1756, 1194, 1055, 1003  $\text{cm}^{-1}$ ; HRMS (ESI) calcd for  $\text{C}_{19}\text{H}_{19}\text{FNO}$   $[\text{M}+\text{H}]^+$  296.1445, found 296.1453.

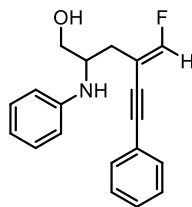

**(E)-4-(fluoromethylene)-6-phenyl-2-(phenylamino)hex-5-yn-1-ol (7a').**

colorless oil (41%, 24.2 mg);  $R_f = 0.5$  (petroleum ether/ethyl acetate = 5:1);  $^1\text{H NMR}$  (400 MHz,  $\text{CDCl}_3$ )  $\delta$  7.48 – 7.46 (m, 2H), 7.36 (s, 3H), 7.20 (t,  $J = 7.6$  Hz, 2H), 7.04 (d,  $J = 116.8$  Hz, 1H), 6.79 – 6.67 (m, 3H), 3.85 (s, 2H), 3.78 – 3.65 (m, 1H), 2.45 – 2.26 (m, 2H);  $^{13}\text{C NMR}$  (100 MHz,  $\text{CDCl}_3$ )  $\delta$  152.8 (d,  $J = 271.1$  Hz), 147.0, 129.6,

128.9, 128.5, 122.7, 118.3, 114.0, 103.9 (d,  $J = 5.2$  Hz), 96.9 (d,  $J = 7.9$  Hz), 82.3 (d,  $J = 2.7$  Hz), 63.2, 53.5, 31.3;  $^{19}\text{F}$  NMR (376 MHz,  $\text{CDCl}_3$ )  $\delta$  -113.55 (d,  $J = 81.2$  Hz); IR (neat):  $\nu_{\text{max}}$  ( $\text{cm}^{-1}$ ) 3389, 2984, 1737, 1603, 1238, 1095, 1043, 939  $\text{cm}^{-1}$ ; HRMS (ESI) calcd for  $\text{C}_{19}\text{H}_{19}\text{FNO}$   $[\text{M}+\text{H}]^+$  296.1445, found 296.1455.

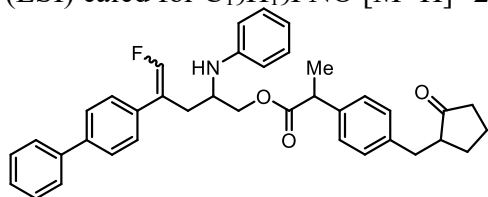

**4-([1,1'-Biphenyl]-4-yl)-5-fluoro-2-(phenylamino)pent-4-en-1-yl-2-(4-((2-oxocyclopentyl)methyl)phenyl)propanoate (8)**

colorless oil (80%, 92.0 mg, Z/E = 1:1);  $R_f = 0.6$  (petroleum ether/ethyl acetate = 10:1);  $^1\text{H}$  NMR (400 MHz,  $\text{CDCl}_3$ )  $\delta$  7.63 – 7.54 (m, 3H), 7.48 (t,  $J = 7.2$  Hz, 2H), 7.41 – 7.37 (m, 1H), 7.28 – 7.22 (m, 5H), 7.16 – 7.09 (m, 5H), 6.97 (d,  $J = 9.2$  Hz, 1H), 6.78 – 6.67 (m, 1H), 6.45 – 6.40 (m, 1H), 4.23 – 4.04 (m, 1H), 3.73 – 3.68 (m, 4H), 3.15 (dd,  $J = 14.0, 3.6$  Hz, 1H), 2.82 – 2.72 (m, 1H), 2.56 – 2.48 (m, 1H), 2.40 – 2.33 (m, 2H), 2.18 – 2.09 (m, 2H), 2.00 – 1.94 (m, 1H), 1.79 – 1.71 (m, 1H), 1.66 (s, 3H), 1.52 – 1.47 (m, 2H);  $^{13}\text{C}$  NMR (101 MHz,  $\text{CDCl}_3$ )  $\delta$  175.1, 174.4, 148.7, 146.7, 146.1, 140.4, 139.0, 138.9, 138.4, 138.4, 134.5 (dd,  $J = 8.8, 2.7$  Hz), 129.24, 129.16, 128.9, 127.6, 127.5, 127.5), 127.3, 127.0, 117.8, 113.4, 65.3, 62.7, 52.0, 51.0, 50.7, 45.1, 45.0, 38.2, 35.2, 29.3, 20.6, 18.6, 18.2;  $^{19}\text{F}$  NMR (376 MHz,  $\text{CDCl}_3$ )  $\delta$  -127.92 (d,  $J = 85.4$  Hz), -127.96 (d,  $J = 84.6$  Hz); IR (neat):  $\nu_{\text{max}}$  ( $\text{cm}^{-1}$ ) 3788, 2697, 2958, 2349, 1601, 1372, 1277, 1033, 860  $\text{cm}^{-1}$ ; HRMS (ESI) calcd for  $\text{C}_{38}\text{H}_{39}\text{FNO}_3$   $[\text{M}+\text{H}]^+$  576.2909, found 576.2906.

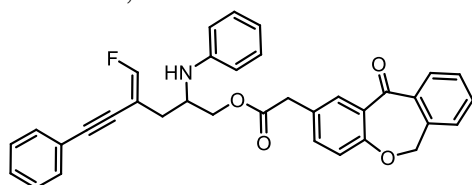

**(Z)-4-(Fluoromethylene)-6-phenyl-2-(phenylamino)hex-5-yn-1-yl-2-(11-oxo-6,11-dihydrodibenzo[b,e]oxepin-2-yl)acetate (9)**

colorless oil (92%, 100.3 mg);  $R_f = 0.6$  (petroleum ether/ethyl acetate = 10:1);  $^1\text{H}$  NMR (400 MHz,  $\text{CDCl}_3$ )  $\delta$  8.14 (s, 1H), 7.89 (d,  $J = 7.6$  Hz, 1H), 7.59 – 7.43 (m, 4H), 7.42 – 7.34 (m, 3H), 7.33 – 7.30 (m, 2H), 7.18 – 7.12 (m, 2H), 7.00 – 6.91 (m, 2H), 6.73 – 6.66 (m, 3H), 5.16 (s, 2H), 4.40 (dd,  $J = 11.2, 4.8$  Hz, 1H), 4.15 (dd,  $J = 11.2, 4.8$  Hz, 1H), 4.05 – 3.99 (m, 1H), 3.65 (s, 2H), 2.60 – 2.52 (m, 2H);  $^{13}\text{C}$  NMR (100 MHz,  $\text{CDCl}_3$ )  $\delta$  190.9, 171.4, 160.6, 155.7, 153.0, 146.8, 140.5, 136.4, 135.7, 132.9, 132.6, 131.6, 129.6, 129.5, 129.4, 128.7, 128.5, 127.9, 127.7, 125.2, 121.2, 118.0, 113.5, 105.7 (d,  $J = 19.2$  Hz), 91.74 (d,  $J = 9.3$  Hz), 84.01 (d,  $J = 14.9$  Hz), 73.7, 65.7, 50.9, 40.2, 29.5;  $^{19}\text{F}$  NMR (376 MHz,  $\text{CDCl}_3$ )  $\delta$  -117.49 (d,  $J = 83.2$  Hz); IR (neat):  $\nu_{\text{max}}$  ( $\text{cm}^{-1}$ ) 3376, 2983, 1716, 1496, 1208, 1189, 1026, 752  $\text{cm}^{-1}$ ; HRMS (ESI) calcd for  $\text{C}_{35}\text{H}_{29}\text{FNO}_4$   $[\text{M}+\text{H}]^+$  546.2075, found 546.2071.

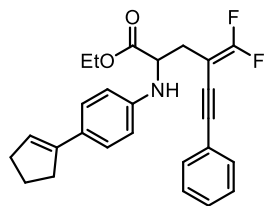

**Ethyl 2-((4-(cyclopent-1-en-1-yl)phenyl)amino)-4-(difluoromethylene)-6-phenylhex-5-ynoate (10)**

colorless oil (51%, 42.9 mg);  $R_f = 0.5$  (petroleum ether/ethyl acetate = 10:1);  $^1\text{H NMR}$  (400 MHz,  $\text{CDCl}_3$ )  $\delta$  7.46 (d,  $J = 5.2$  Hz, 2H), 7.36 (s, 3H), 7.30 (d,  $J = 8.0$  Hz, 2H), 6.67 (d,  $J = 8.0$  Hz, 2H), 6.01 (s, 1H), 4.40 (t,  $J = 6.0$  Hz, 1H), 4.22 (q,  $J = 7.2$  Hz, 2H), 2.73 – 2.67 (m, 2H), 2.52 (s, 1H), 2.07 – 1.94 (m, 1H), 1.28 (t,  $J = 6.4$  Hz, 3H);  $^{13}\text{C NMR}$  (101 MHz,  $\text{CDCl}_3$ )  $\delta$  172.6, 159.60 (dd,  $J = 295.6$ , 292.5 Hz), 145.0, 142.0, 131.5, 128.7, 128.4, 127.9, 126.7, 122.7, 122.5, 113.6, 94.3 (t,  $J = 5.4$  Hz), 80.3 (dd,  $J = 6.5$ , 4.4 Hz), 75.3 (dd,  $J = 34.4$ , 19.3 Hz), 61.6, 55.4, 54.0, 33.2, 30.7, 23.4, 14.1;  $^{19}\text{F NMR}$  (376 MHz,  $\text{CDCl}_3$ )  $\delta$  -77.21 (d,  $J = 10.9$  Hz), -83.03 (d,  $J = 10.9$  Hz); IR (neat):  $\nu_{\text{max}}$  ( $\text{cm}^{-1}$ ) 3373, 2883, 2823, 1719, 1633, 1434, 1277, 1031, 806  $\text{cm}^{-1}$ ; HRMS (ESI) calcd for  $\text{C}_{26}\text{H}_{26}\text{F}_2\text{NO}_2$   $[\text{M}+\text{H}]^+$  422.1926, found 422.1922.

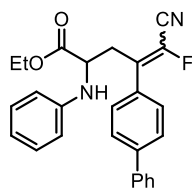

**Ethyl 4-(cyanofluoromethylene)-6-phenyl-2-(phenylamino)hex-5-ynoate (11)**

colorless oil (66%, 47.8 mg);  $R_f = 0.4$  (petroleum ether/ethyl acetate = 5:1);  $^1\text{H NMR}$  (400 MHz,  $\text{CDCl}_3$ )  $\delta$  7.68 (d,  $J = 8.0$  Hz, 2H), 7.64 (d,  $J = 7.2$  Hz, 2H), 7.51 – 7.40 (m, 5H), 7.14 (t,  $J = 8.0$  Hz, 2H), 6.77 (t,  $J = 7.2$  Hz, 1H), 6.47 (d,  $J = 8.0$  Hz, 2H), 4.19 – 4.05 (m, 4H), 3.18 (s, 2H), 1.26 (t,  $J = 7.2$  Hz, 3H);  $^{13}\text{C NMR}$  (100 MHz,  $\text{CDCl}_3$ )  $\delta$  172.2, 145.8, 143.1, 134.0, 136.2 (d,  $J = 14.9$  Hz), 132.4, 130.9, 13.0, 129.5, 129.1, 129.0, 128.1, 127.9, 127.2, 119.0, 113.8, 112.3 (d,  $J = 47.1$  Hz), 61.9, 54.7, 33.5, 14.2;  $^{19}\text{F NMR}$  (376 MHz,  $\text{CDCl}_3$ )  $\delta$  -121.62 (s); IR (neat):  $\nu_{\text{max}}$  ( $\text{cm}^{-1}$ ) 3360, 2982, 2941, 1716, 1497, 1372, 1118, 807  $\text{cm}^{-1}$ ; HRMS (ESI) calcd for  $\text{C}_{26}\text{H}_{24}\text{FN}_2\text{O}_2$   $[\text{M}+\text{H}]^+$  415.1816, found 415.1818.



# 11. <sup>1</sup>H NMR, <sup>13</sup>C NMR and <sup>19</sup>F NMR Spectra of Products 3 and 5 - 11

<sup>1</sup>H, <sup>13</sup>C NMR and <sup>19</sup>F spectra for compound 3a (Chloroform-d)

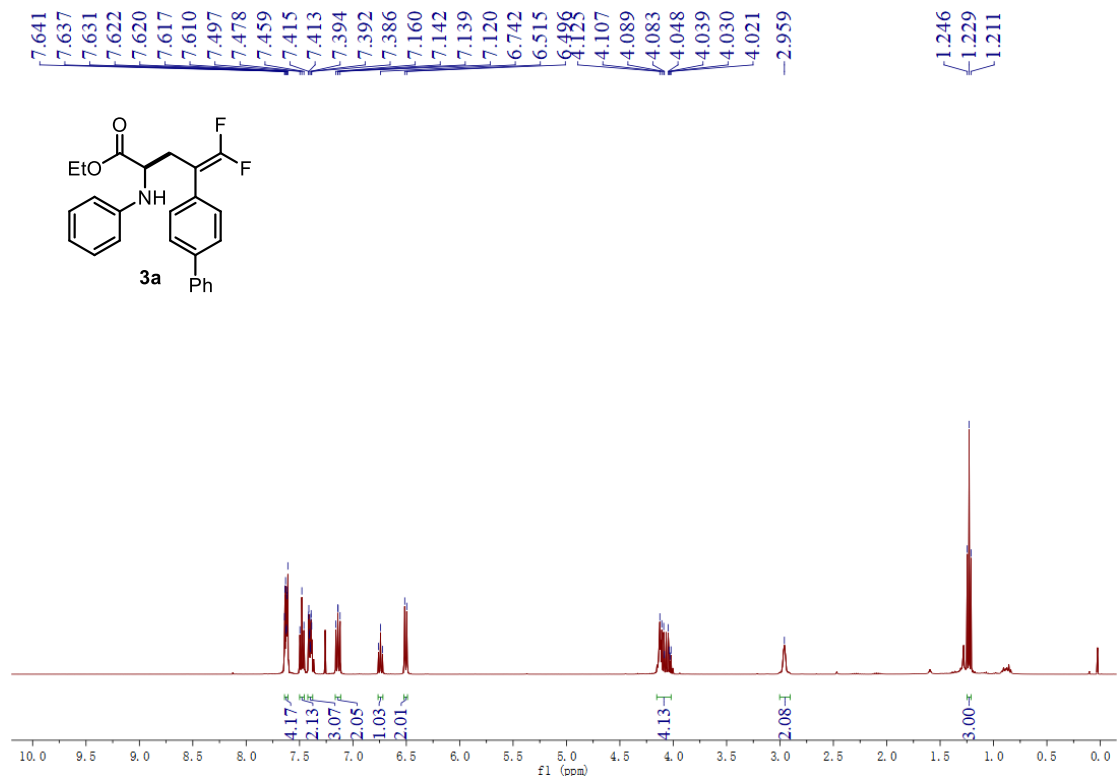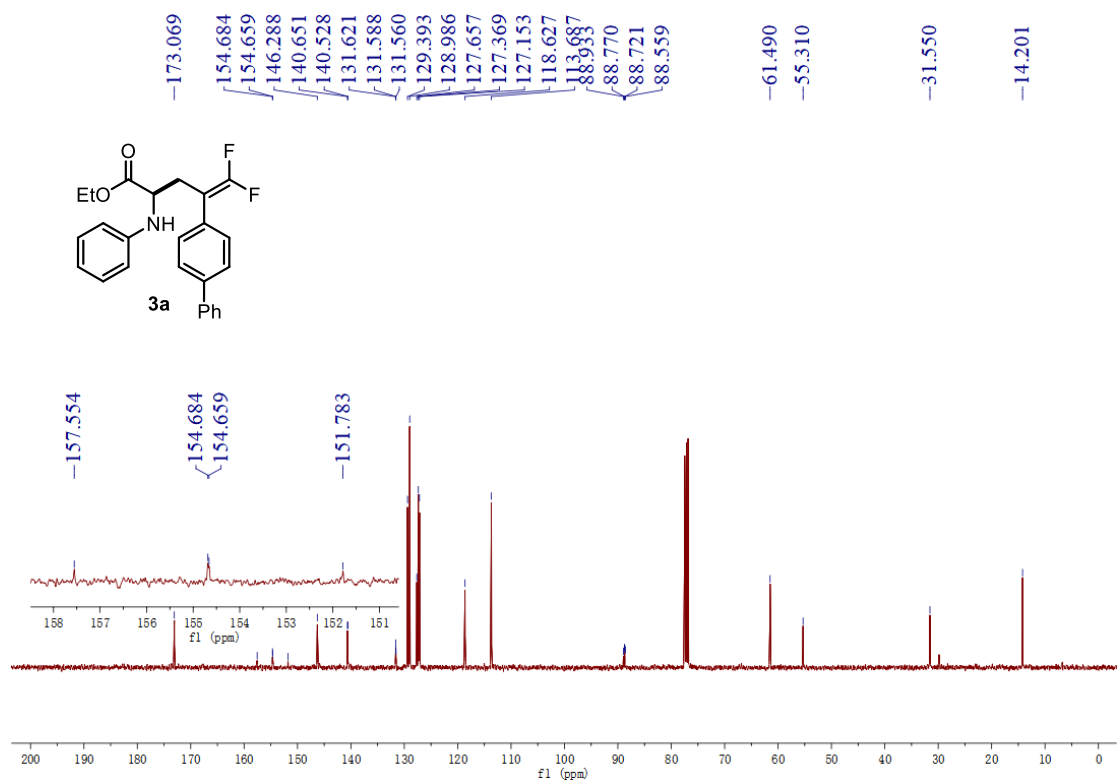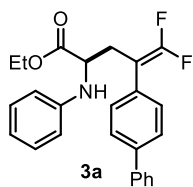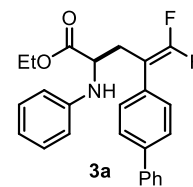

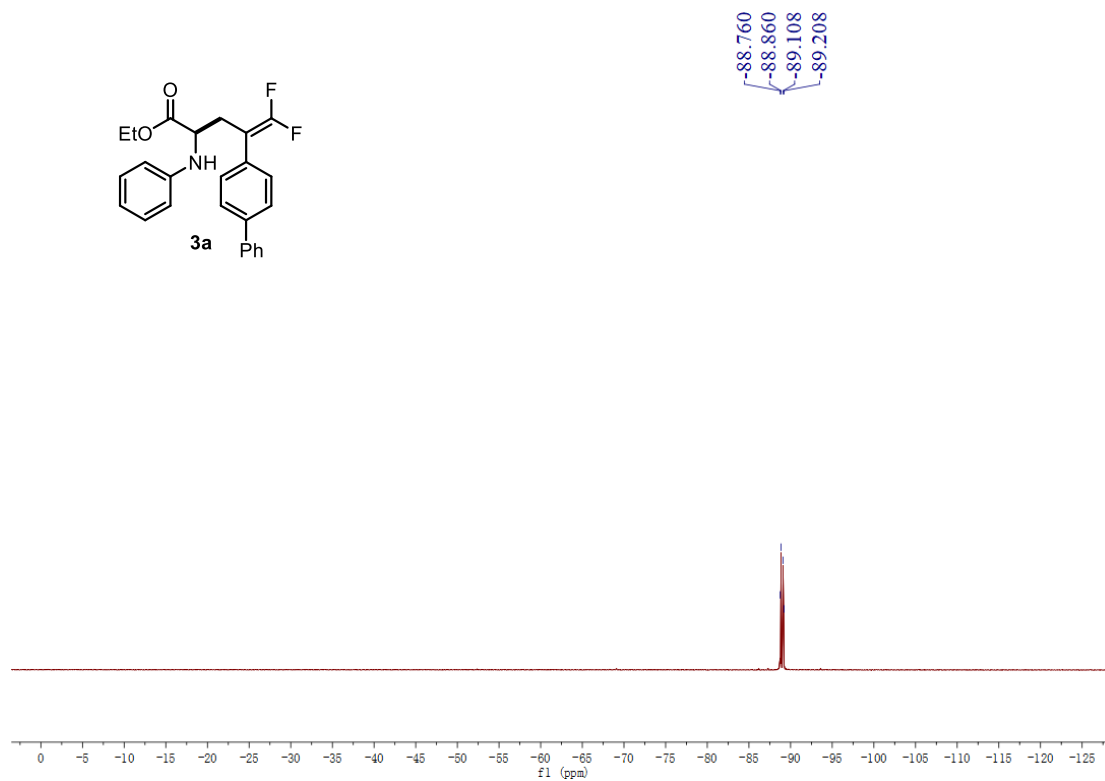

**$^1\text{H}$ ,  $^{13}\text{C}$  NMR and  $^{19}\text{F}$  spectra for compound 3b (Chloroform-d)**

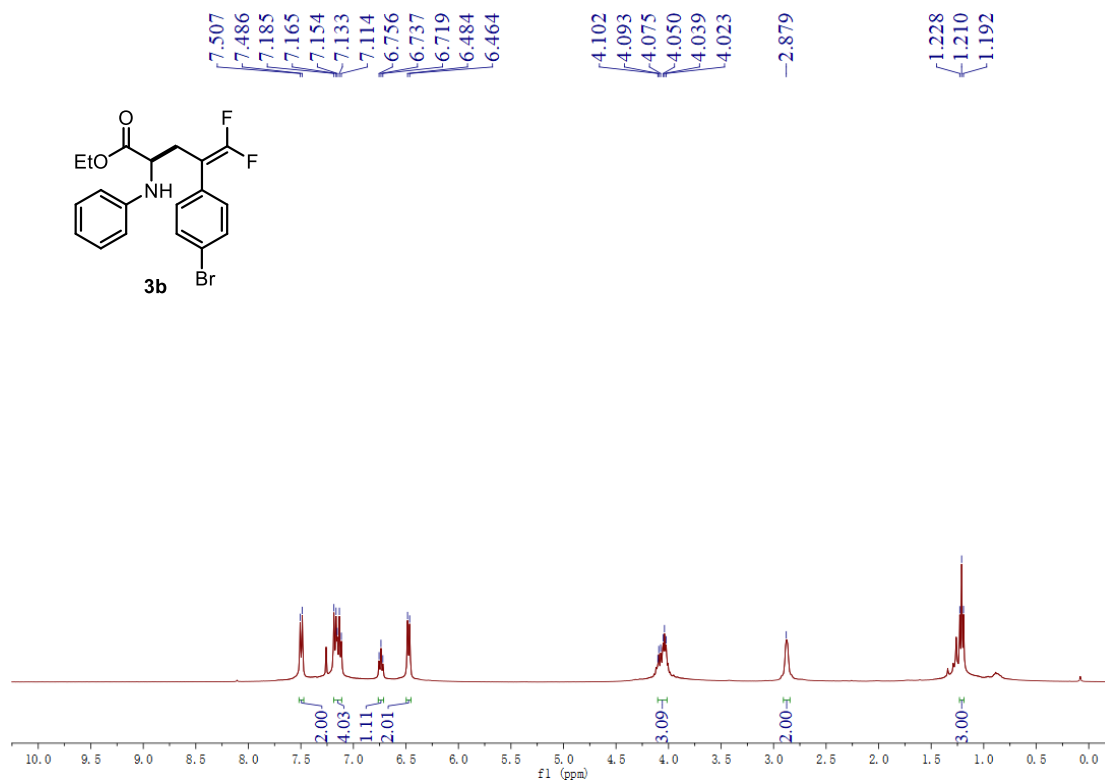

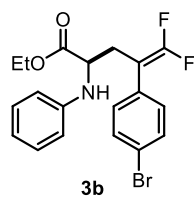

172.906  
 157.442  
 154.566  
 154.540  
 151.665  
 146.164  
 131.901  
 131.658  
 130.311  
 130.282  
 130.252  
 129.435  
 121.940  
 118.789  
 113.712  
 88.522  
 88.390  
 88.334  
 88.173

61.619  
 55.213

31.479

14.193

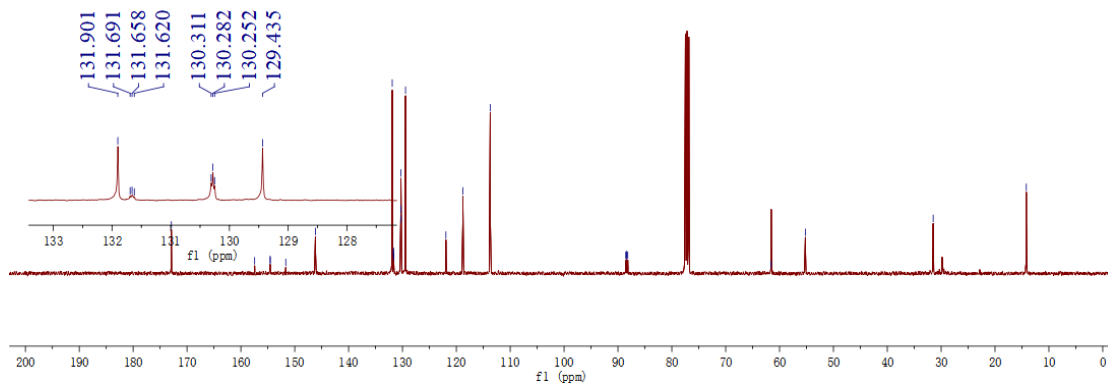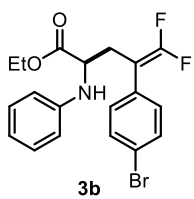

88.439  
 88.536  
 88.812  
 88.909

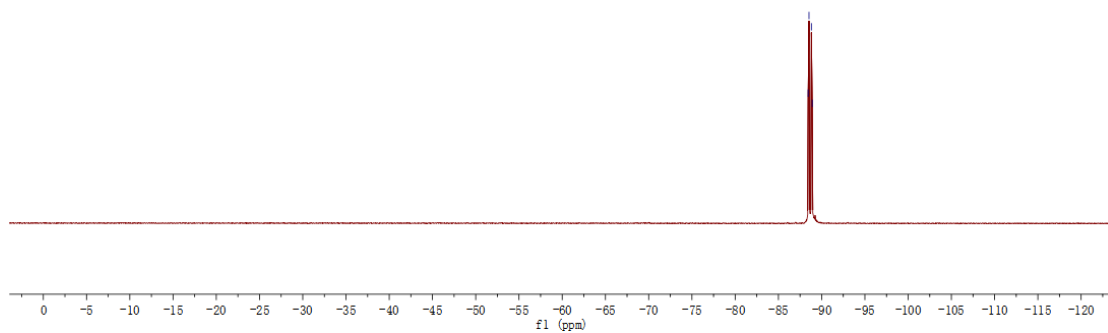

**<sup>1</sup>H, <sup>13</sup>C NMR and <sup>19</sup>F spectra for compound 3c (Chloroform-d)**

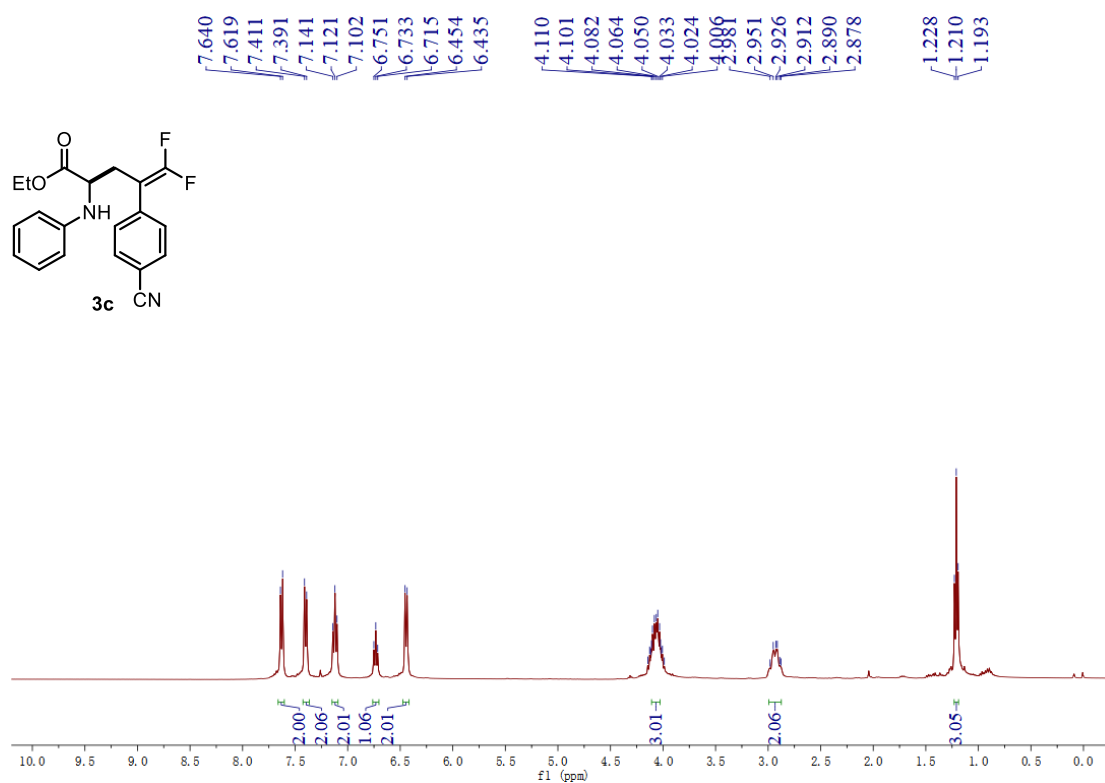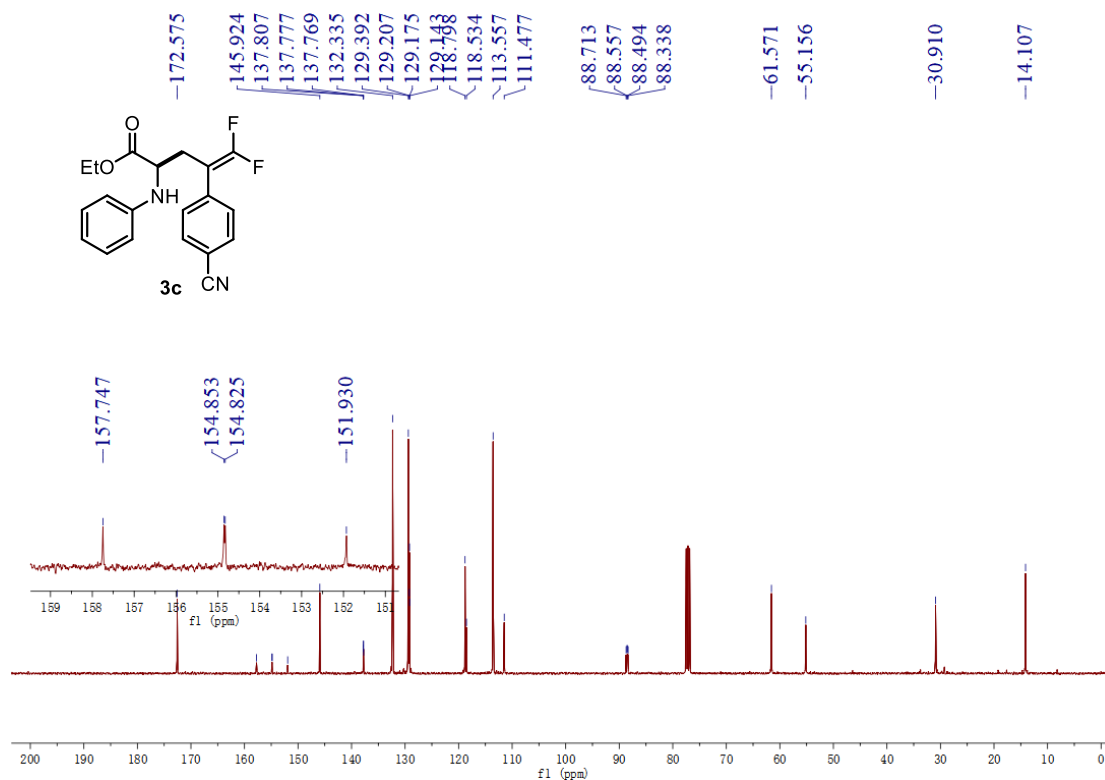

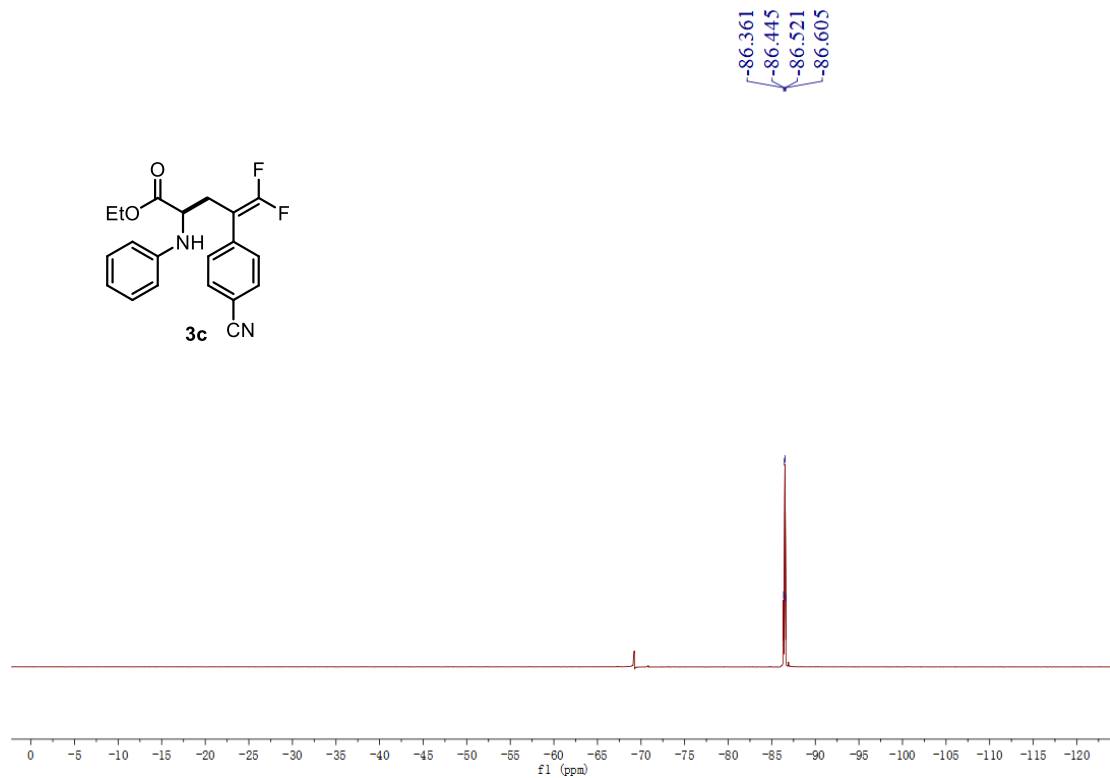

**<sup>1</sup>H, <sup>13</sup>C NMR and <sup>19</sup>F spectra for compound 3d (Chloroform-d)**

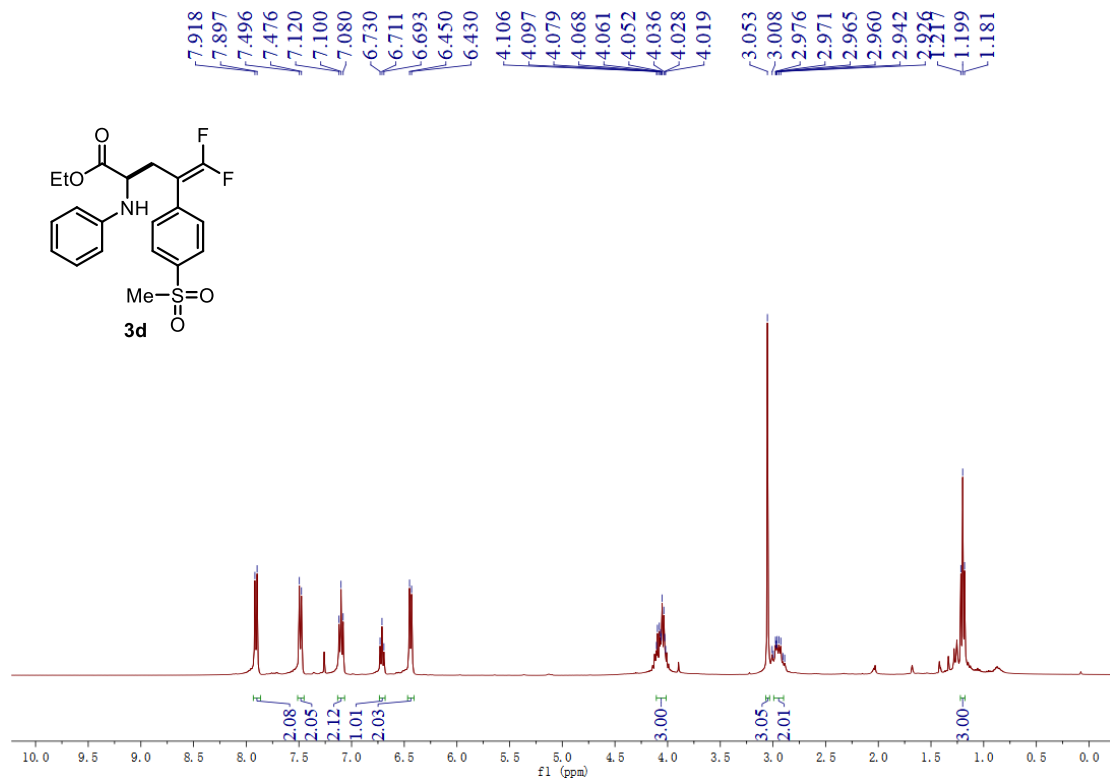

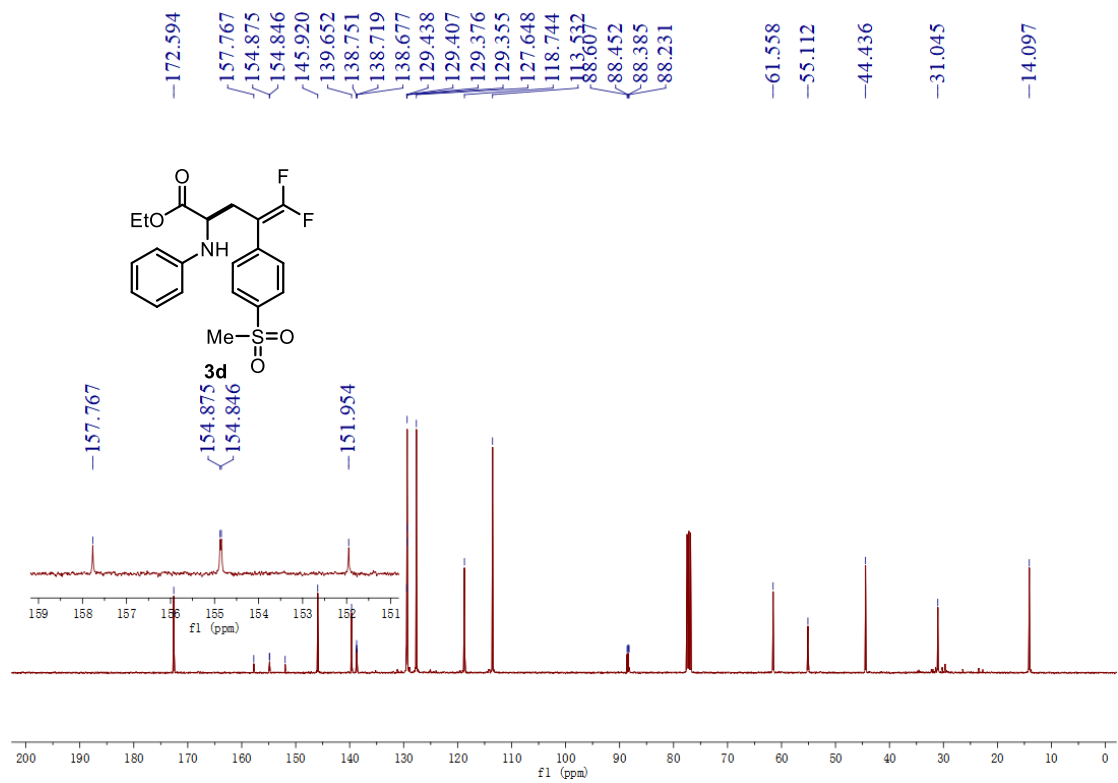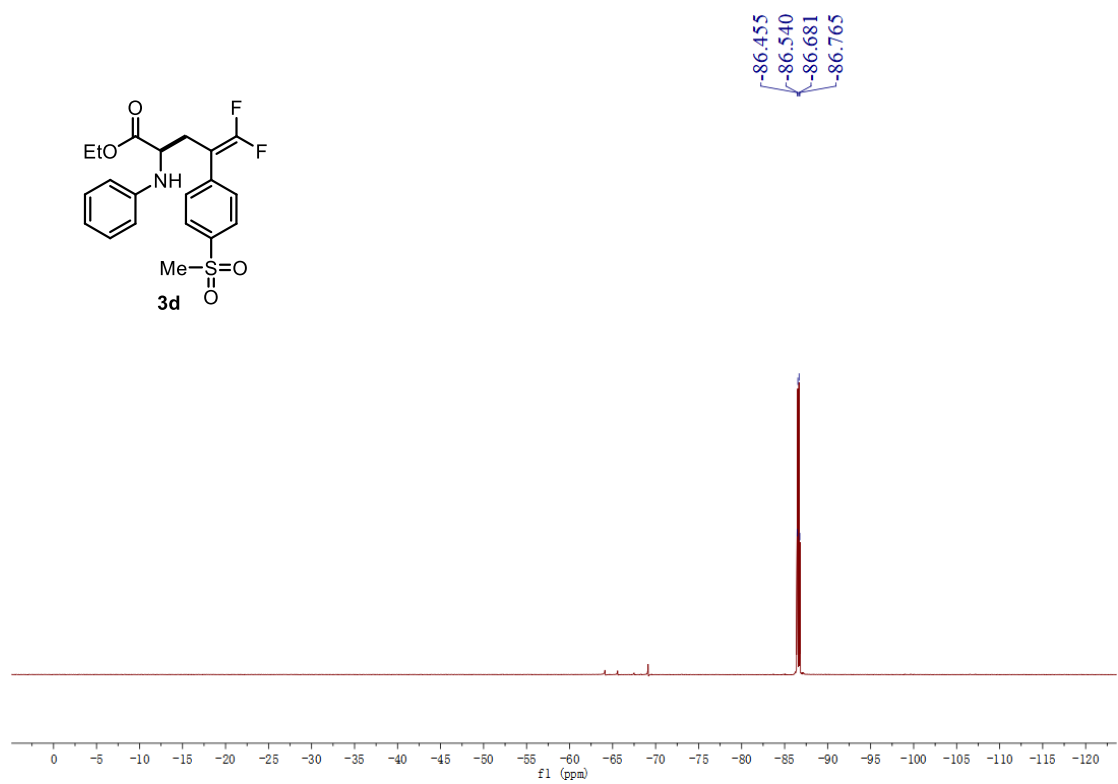

**<sup>1</sup>H, <sup>13</sup>C NMR and <sup>19</sup>F spectra for compound 3e (Chloroform-d)**

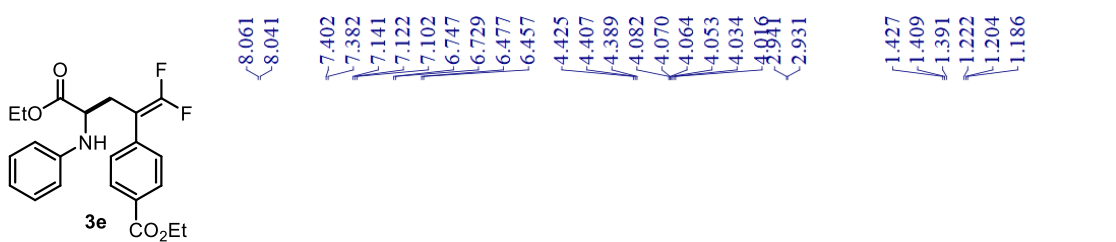

<sup>1</sup>H NMR chemical shifts (ppm): 8.061, 8.041, 7.402, 7.382, 7.141, 7.122, 7.102, 6.747, 6.729, 6.477, 6.457, 4.425, 4.407, 4.389, 4.082, 4.070, 4.064, 4.053, 4.034, 3.946, 3.916, 2.931

<sup>1</sup>H NMR chemical shifts (ppm): 1.427, 1.409, 1.391, 1.222, 1.204, 1.186

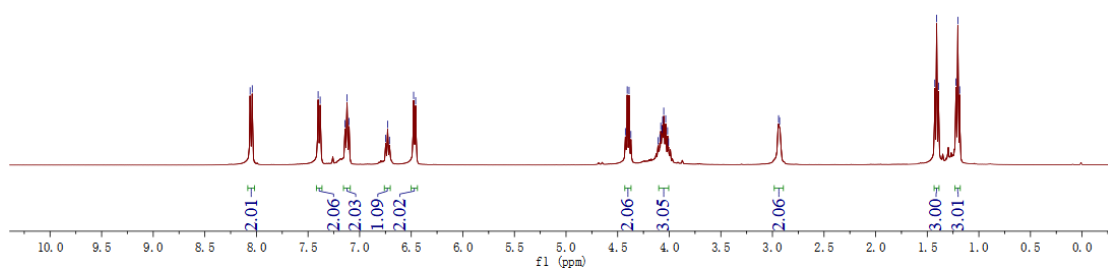

<sup>13</sup>C NMR chemical shifts (ppm): 172.841, 166.228, 157.683, 154.802, 154.767, 151.887, 146.170, 137.452, 137.414, 137.380, 129.867, 129.399, 128.536, 128.506, 128.475, 118.747, 113.684

<sup>13</sup>C NMR chemical shifts (ppm): 89.006, 88.849, 88.790, 88.634

<sup>13</sup>C NMR chemical shifts (ppm): 61.495, 61.190, 55.260

<sup>13</sup>C NMR chemical shifts (ppm): 31.360

<sup>13</sup>C NMR chemical shifts (ppm): 14.418, 14.149

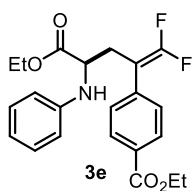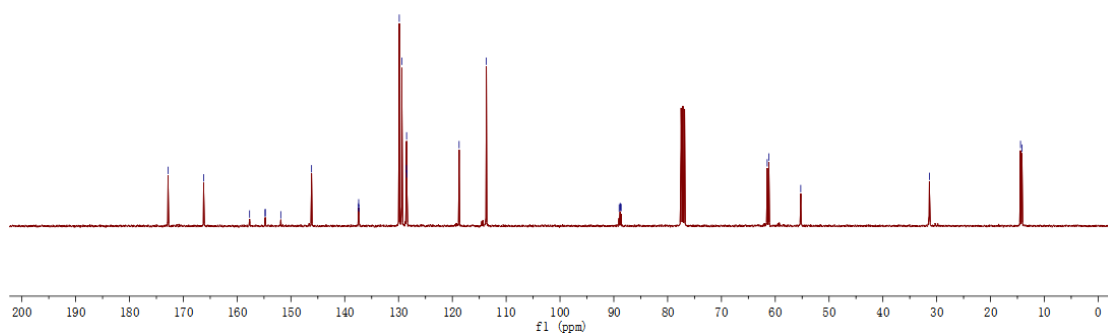

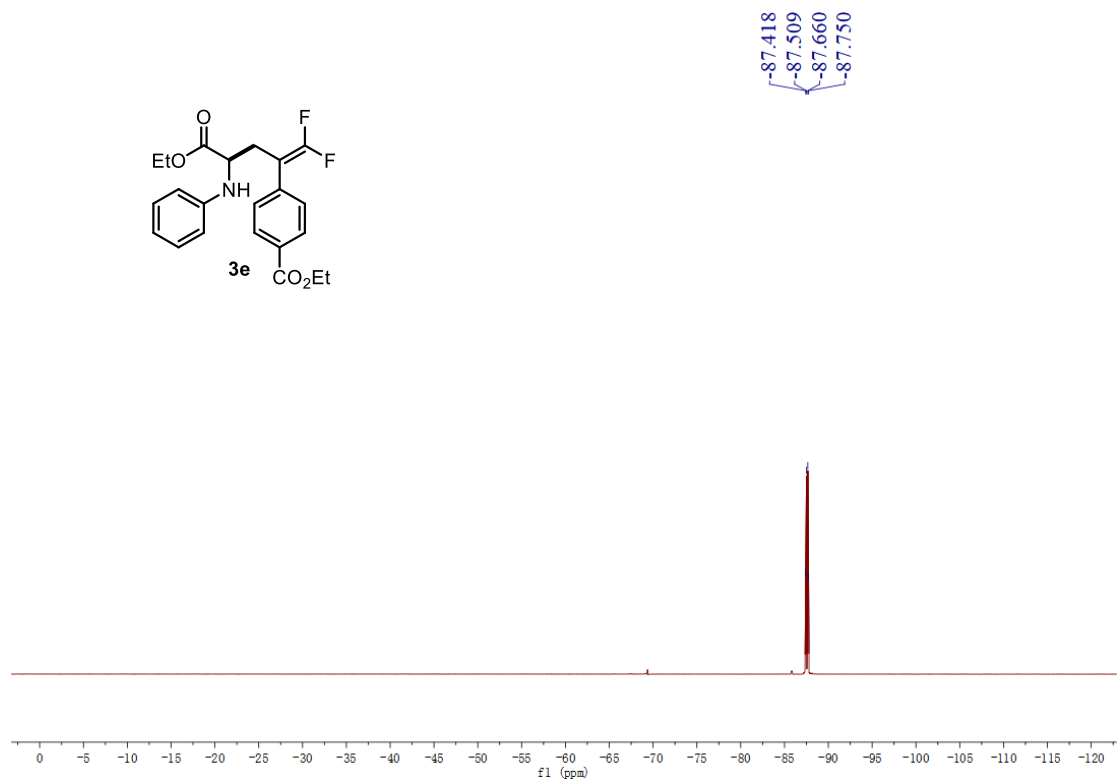

**<sup>1</sup>H, <sup>13</sup>C NMR and <sup>19</sup>F spectra for compound 3f (Chloroform-d)**

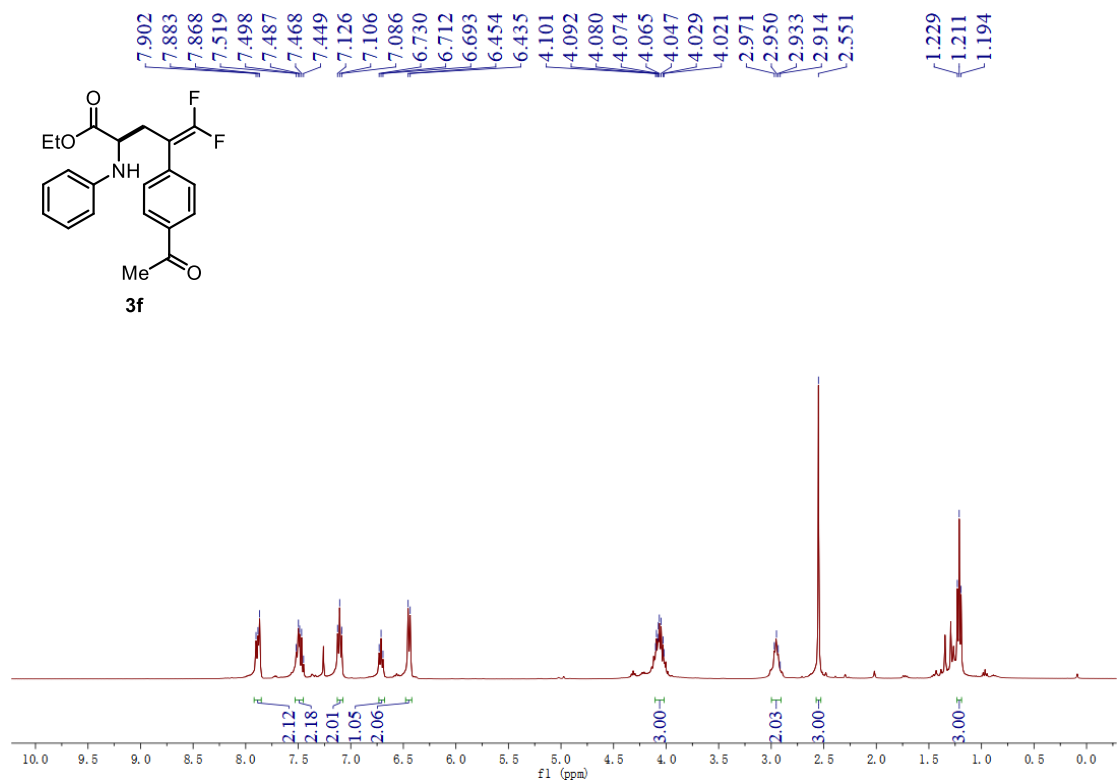



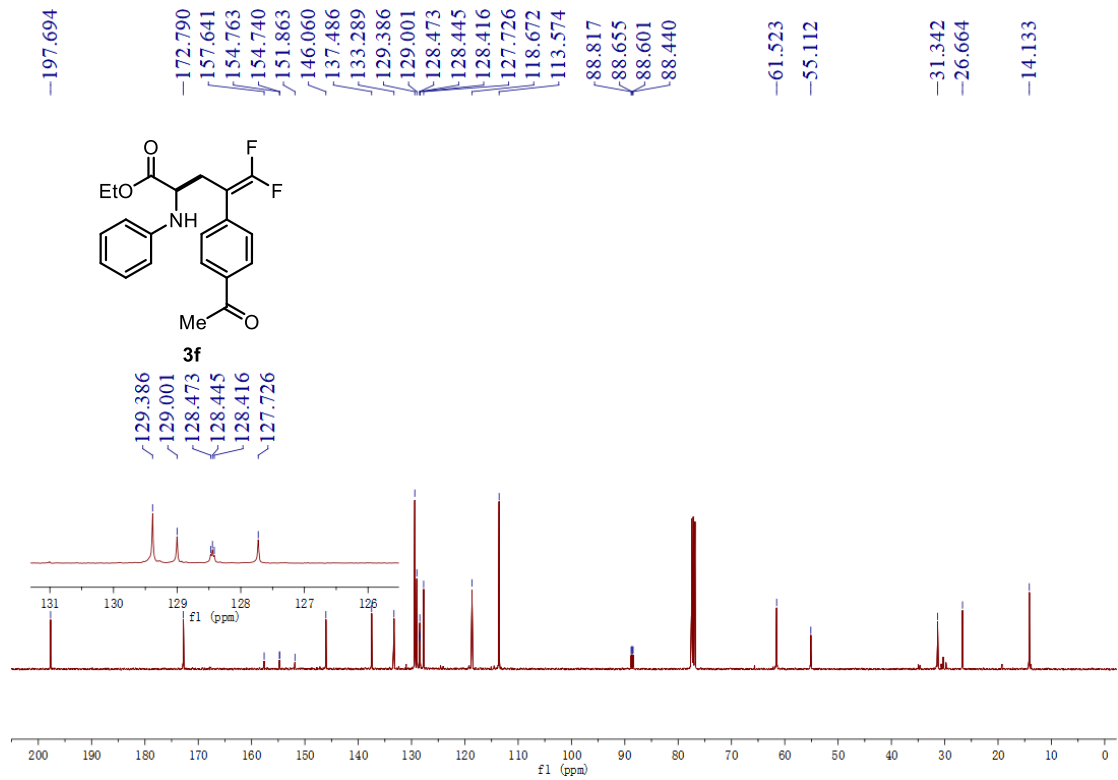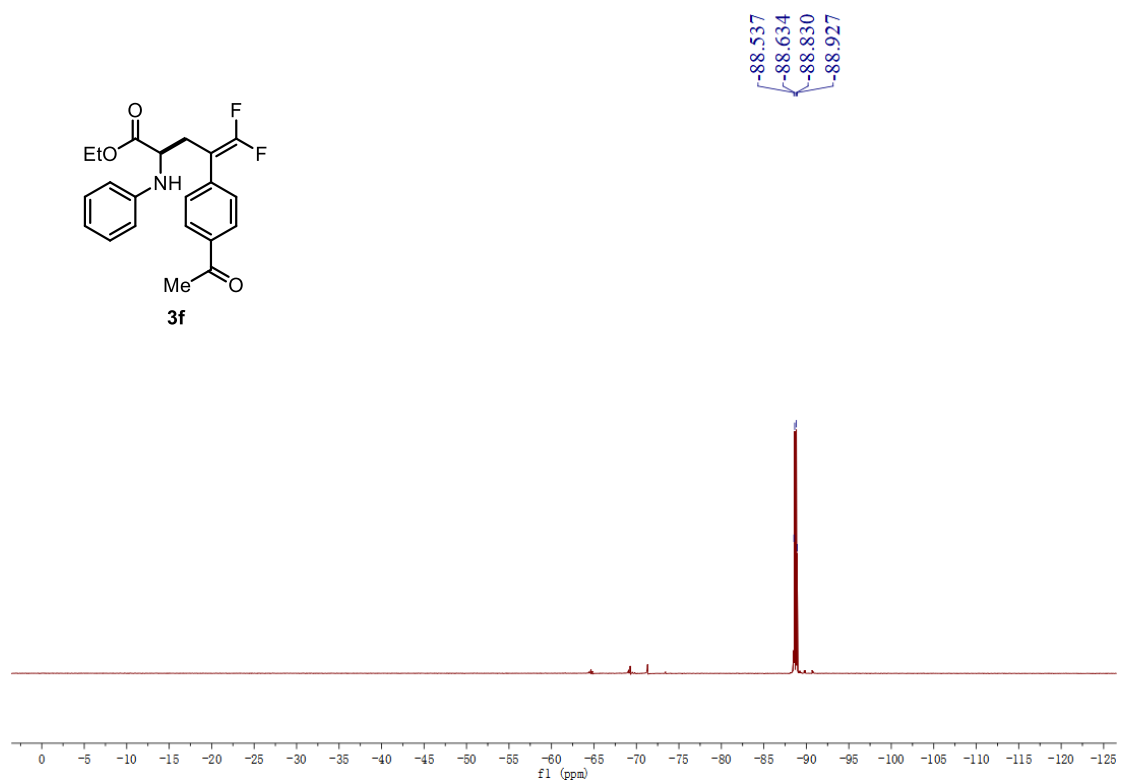

**$^1\text{H}$ ,  $^{13}\text{C}$  NMR and  $^{19}\text{F}$  spectra for compound **3g** (Chloroform-d)**

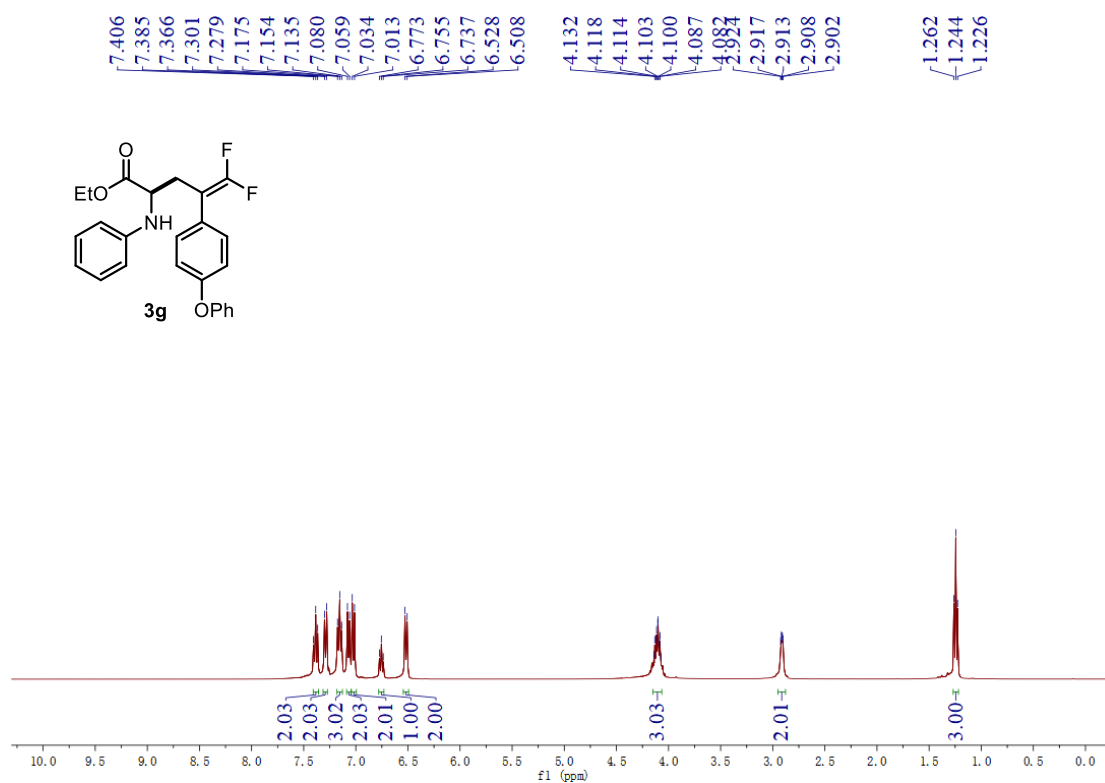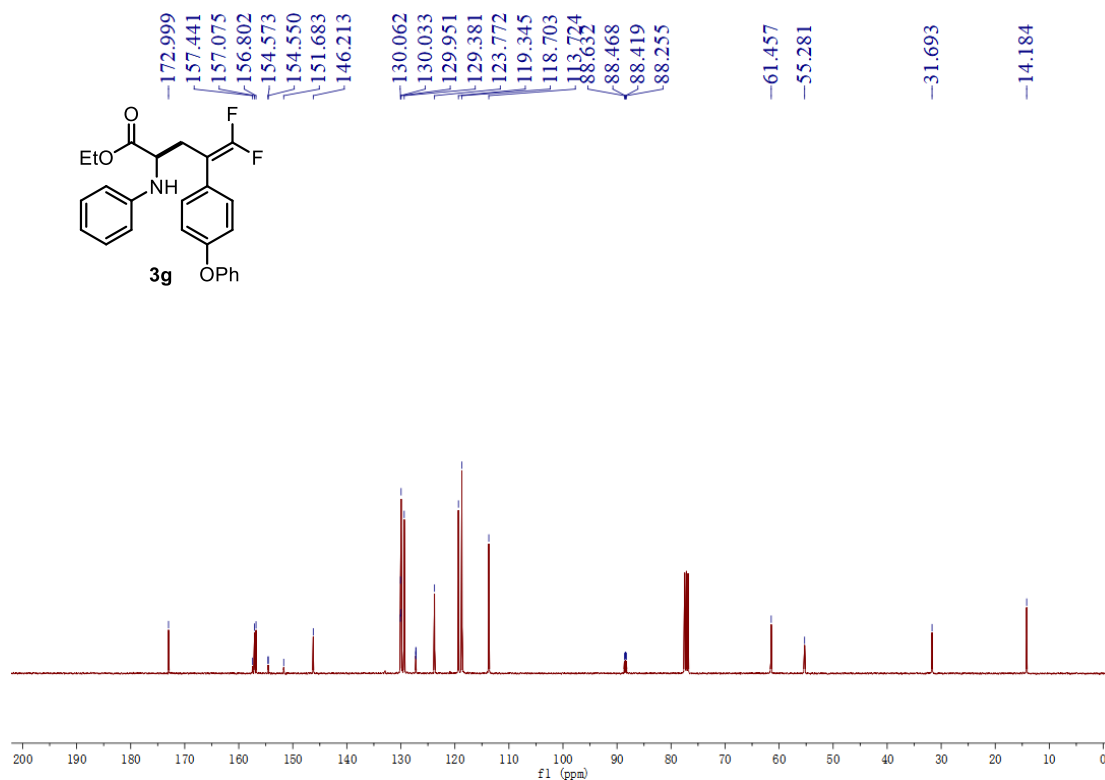

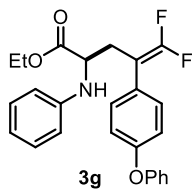

89.543  
89.647  
90.013  
90.117

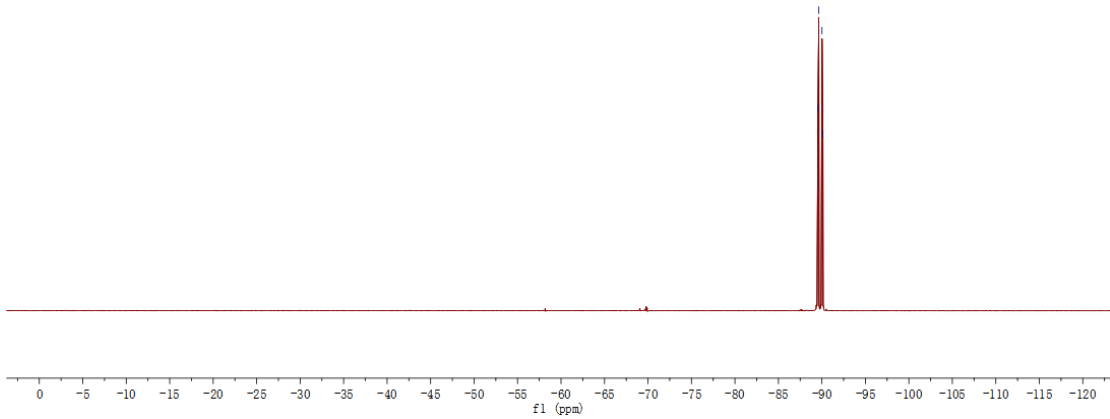

**<sup>1</sup>H, <sup>13</sup>C NMR and <sup>19</sup>F spectra for compound 3h (Chloroform-d)**

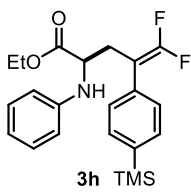

7.530  
7.510  
7.300  
7.282  
7.138  
7.119  
7.099  
6.743  
6.724  
6.706  
6.479  
6.460  
4.087  
4.083  
4.071  
4.055  
4.038  
4.020  
4.002  
3.984  
3.966  
2.917  
2.912  
2.906  
2.901  
1.206  
1.188  
1.170  
0.284

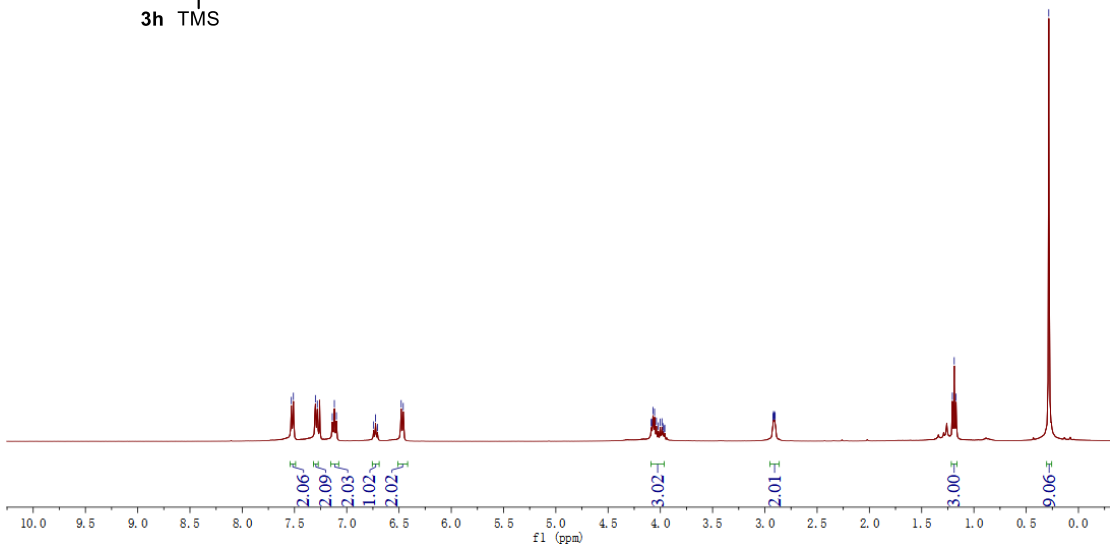

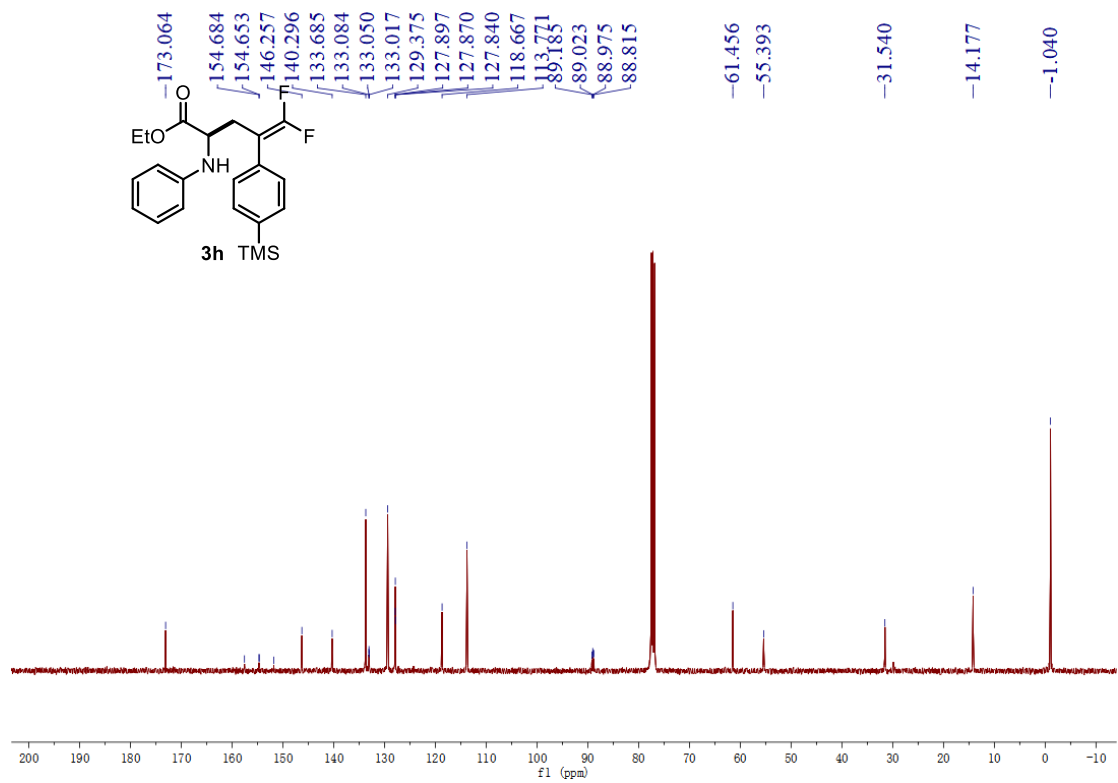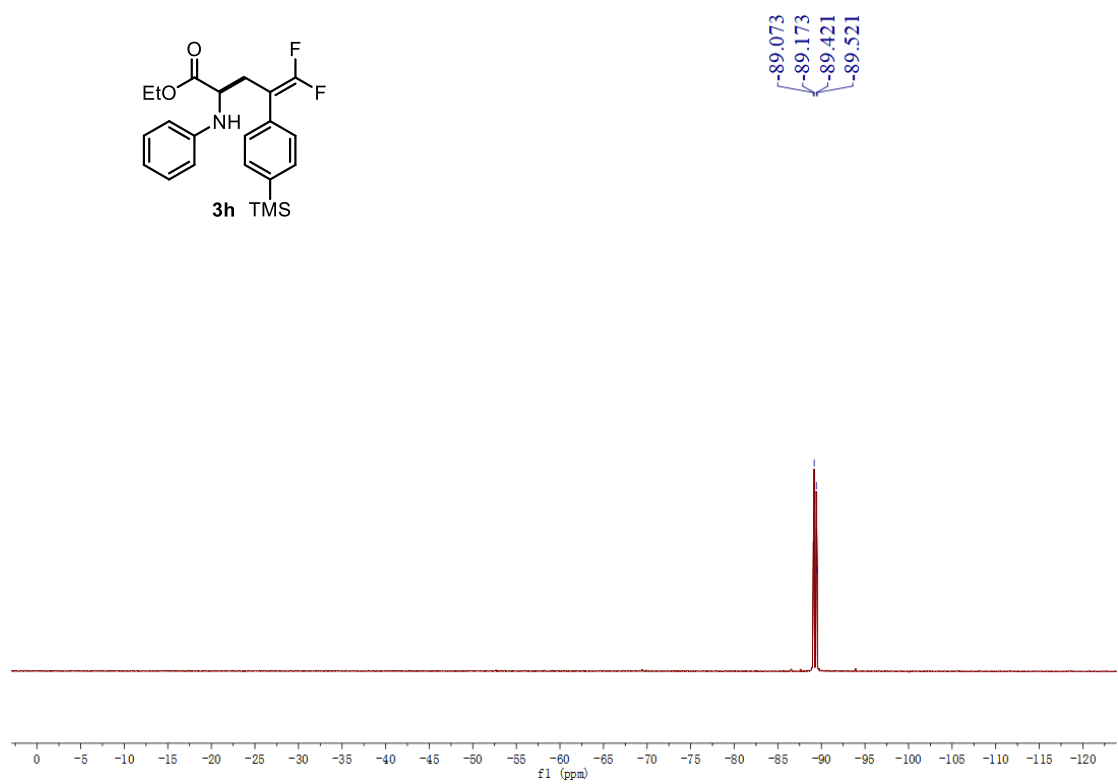

<sup>1</sup>H, <sup>13</sup>C NMR and <sup>19</sup>F spectra for compound 3i (Chloroform-d)

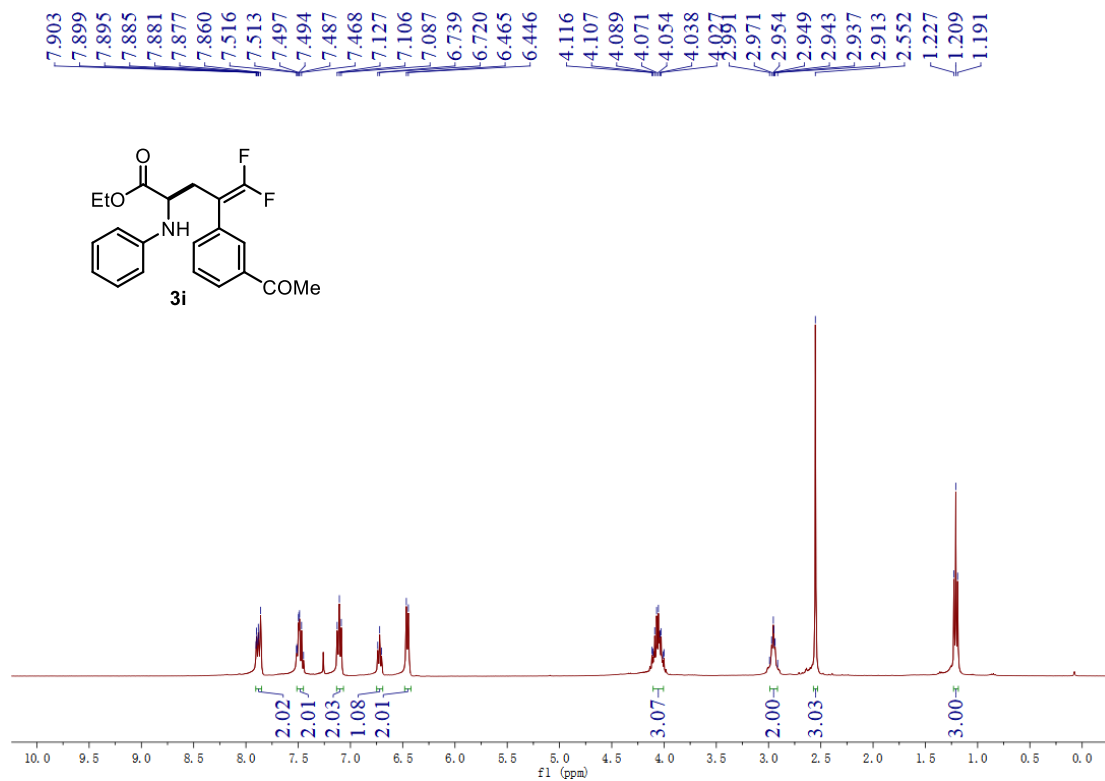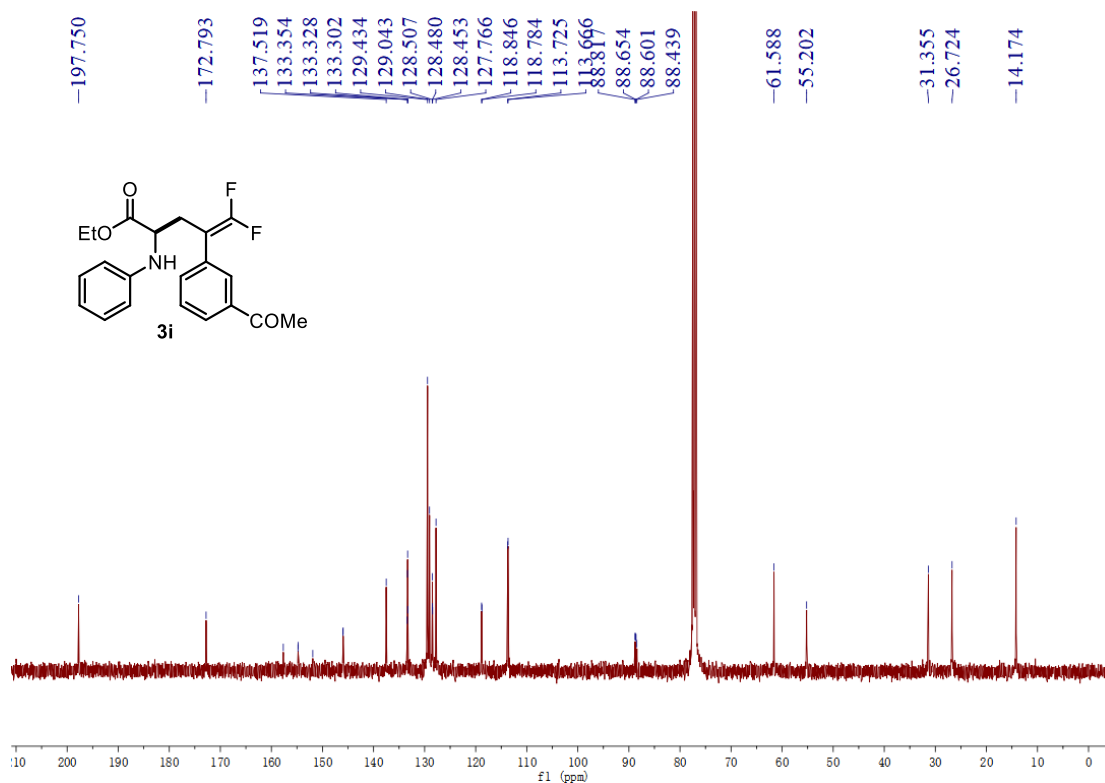

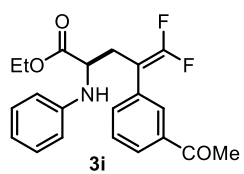

88.489  
88.585  
88.773  
88.870

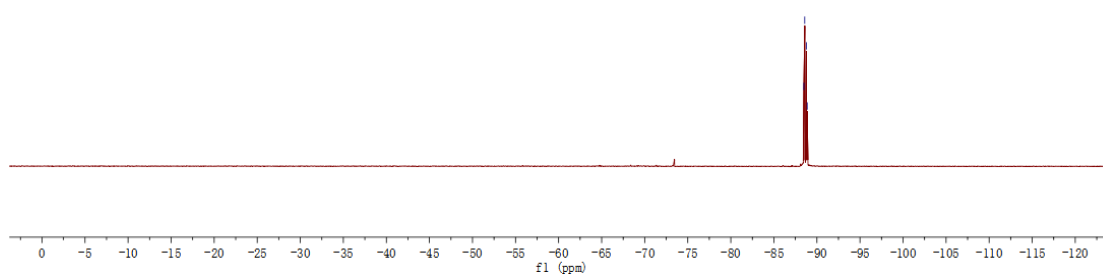

**<sup>1</sup>H, <sup>13</sup>C NMR and <sup>19</sup>F spectra for compound **3j** (Chloroform-d)**

7.879, 7.867, 7.858, 7.836, 7.828, 7.821, 7.813, 7.793, 7.535, 7.527, 7.520, 7.512, 7.463, 7.442, 7.133, 7.114, 7.094, 6.733, 6.487, 6.468, 4.133, 4.102, 4.093, 4.084, 4.075, 4.057, 4.029, 3.032, 3.031, 1.220, 1.202, 1.184

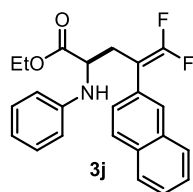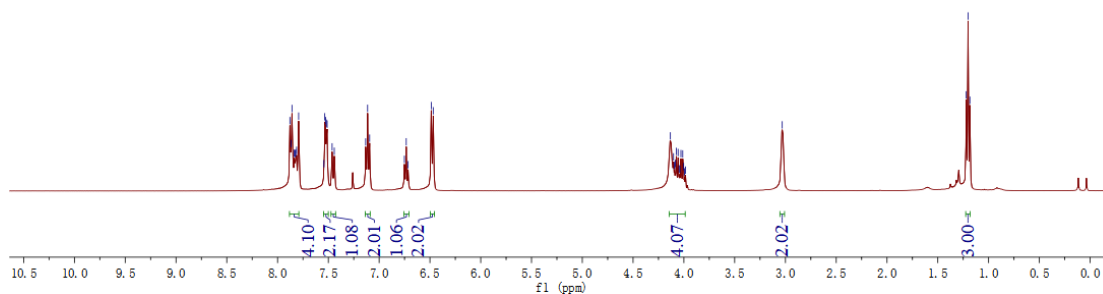

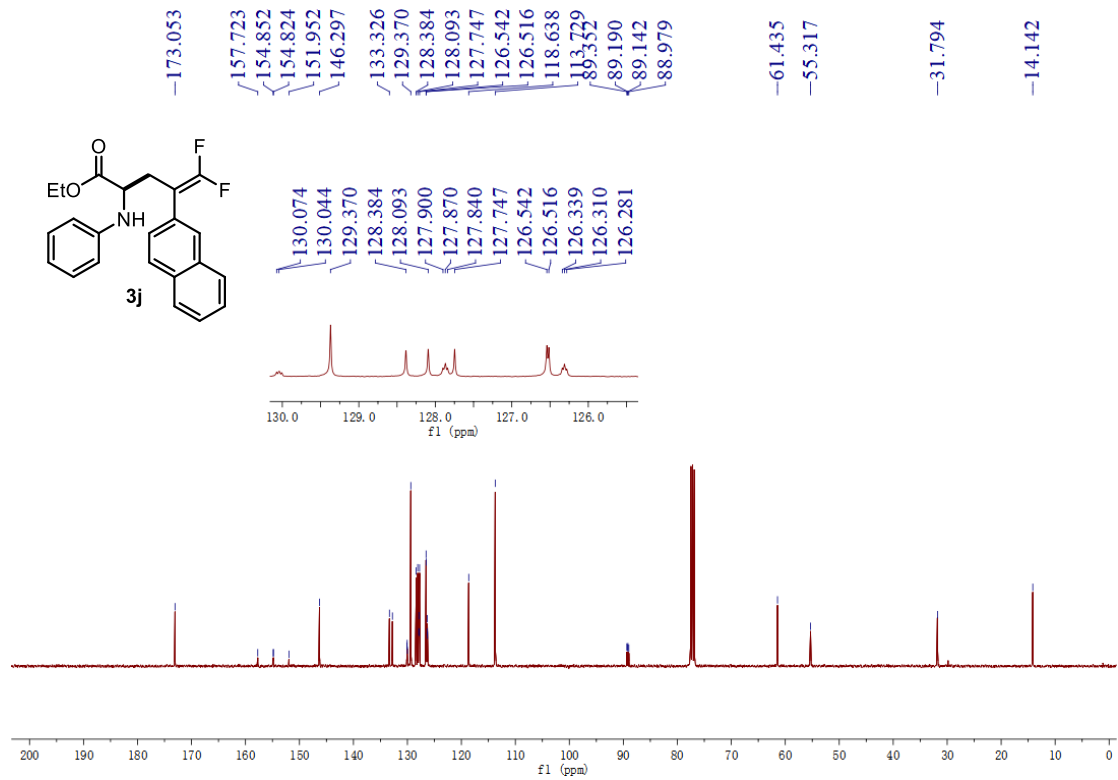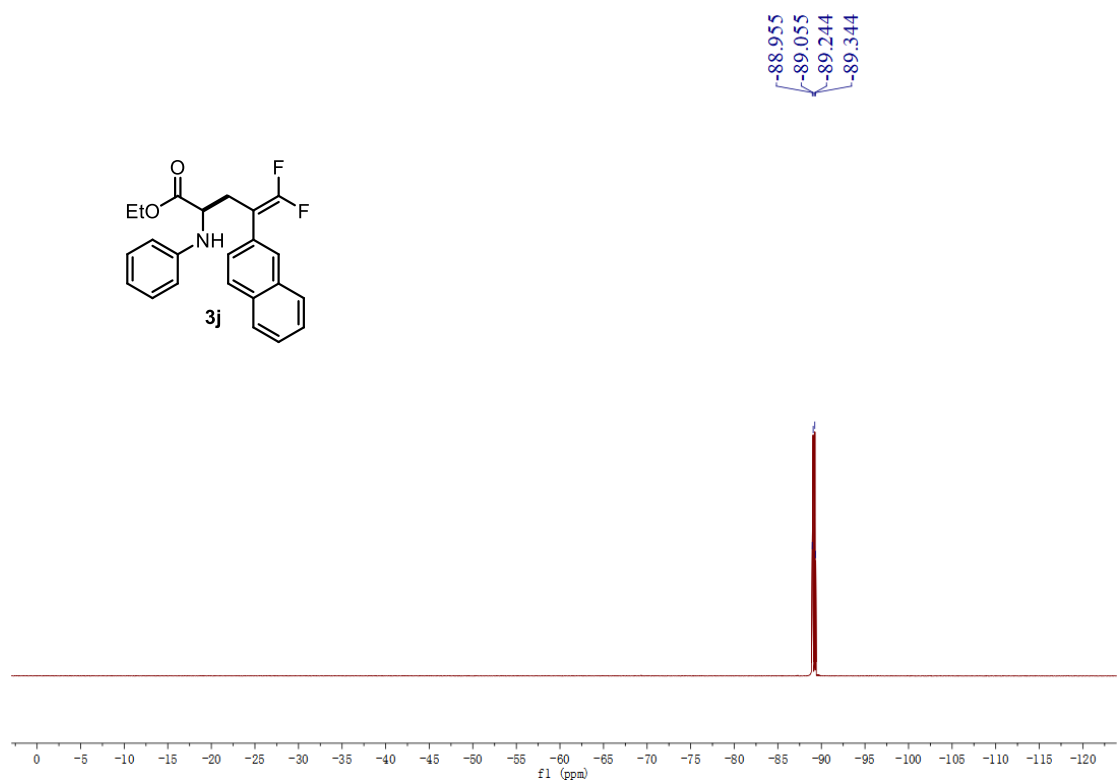

**$^1\text{H}$ ,  $^{13}\text{C}$  NMR and  $^{19}\text{F}$  spectra for compound 3k (Chloroform-d)**

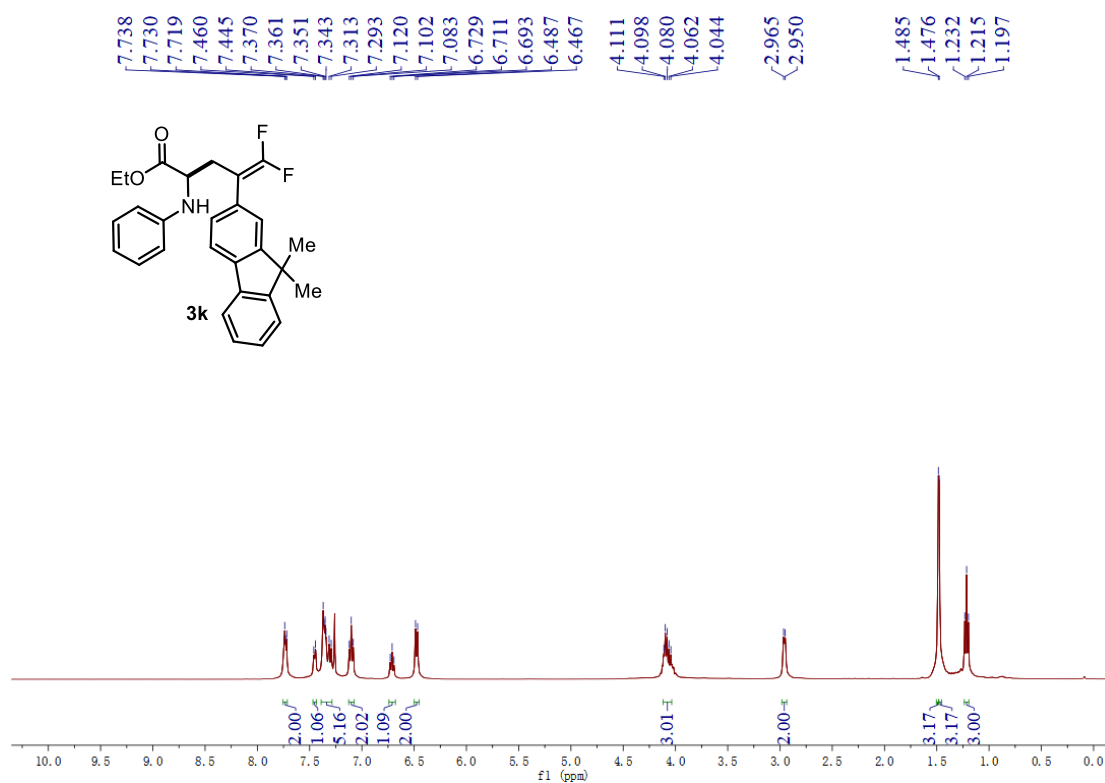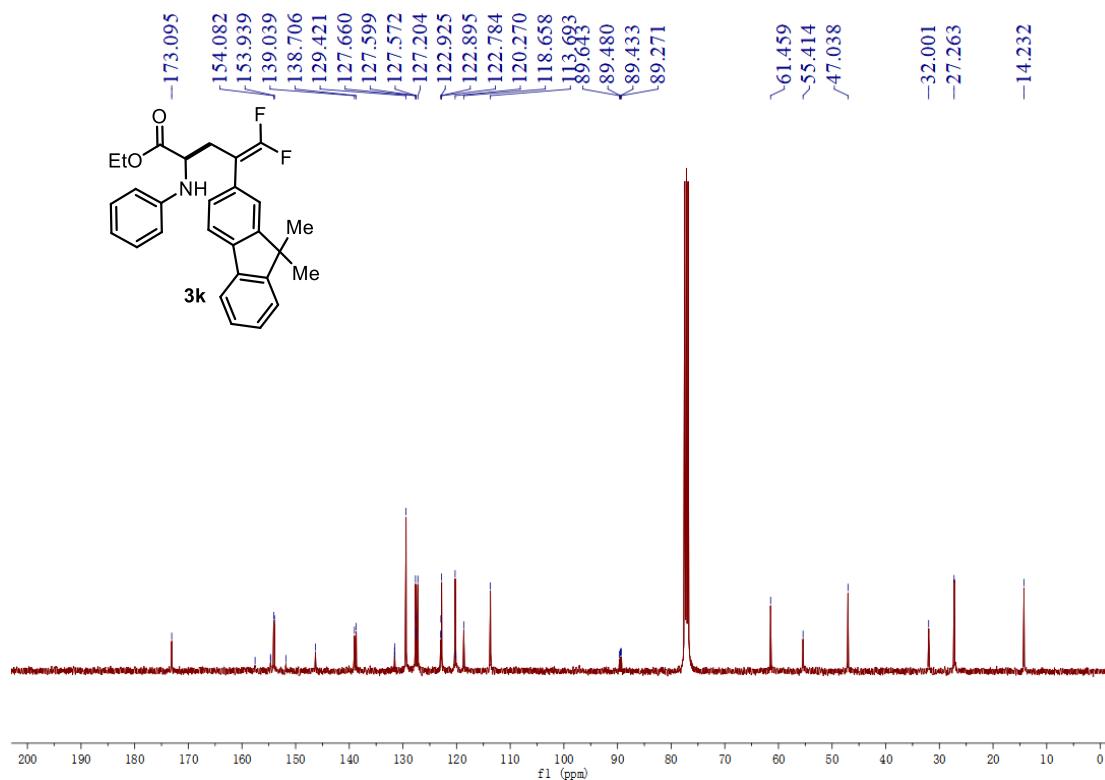



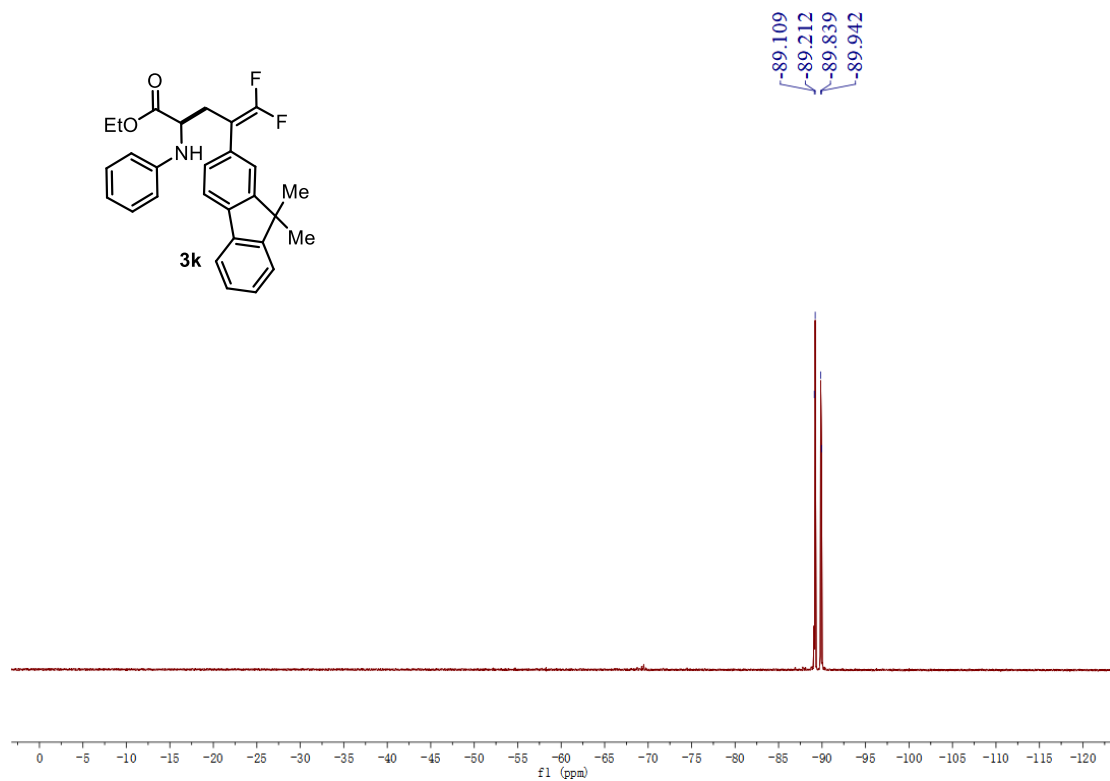

**<sup>1</sup>H, <sup>13</sup>C NMR and <sup>19</sup>F spectra for compound 3l (Chloroform-d)**

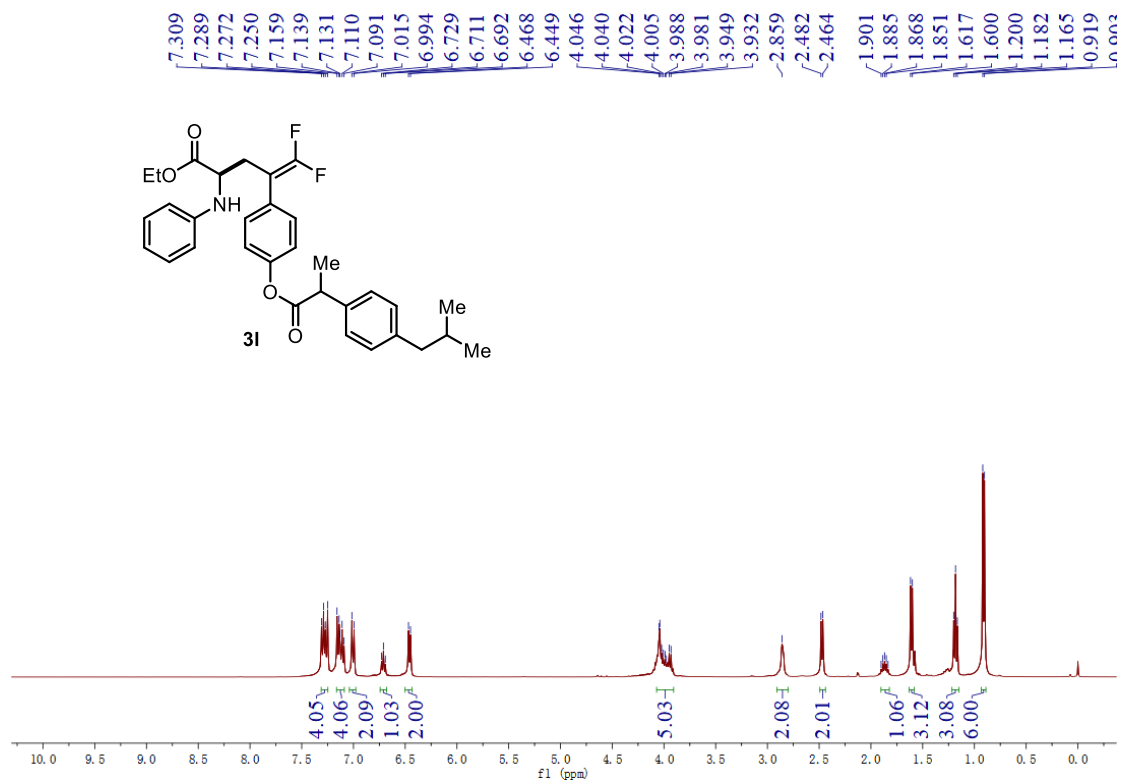

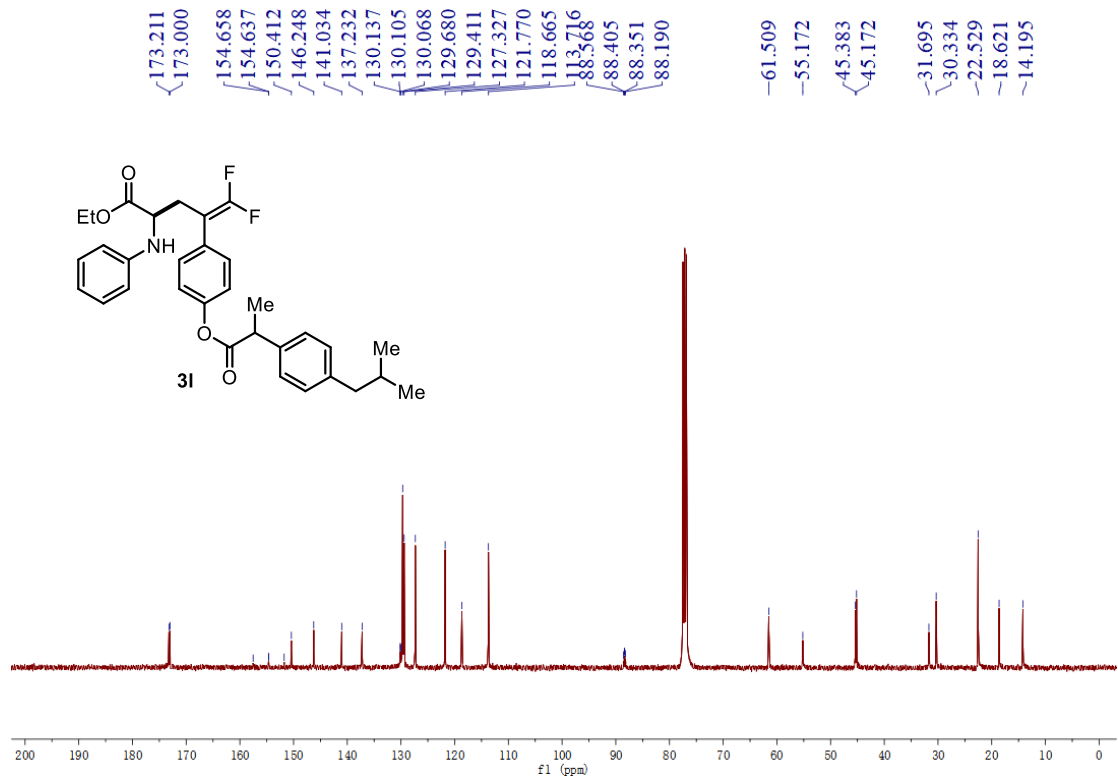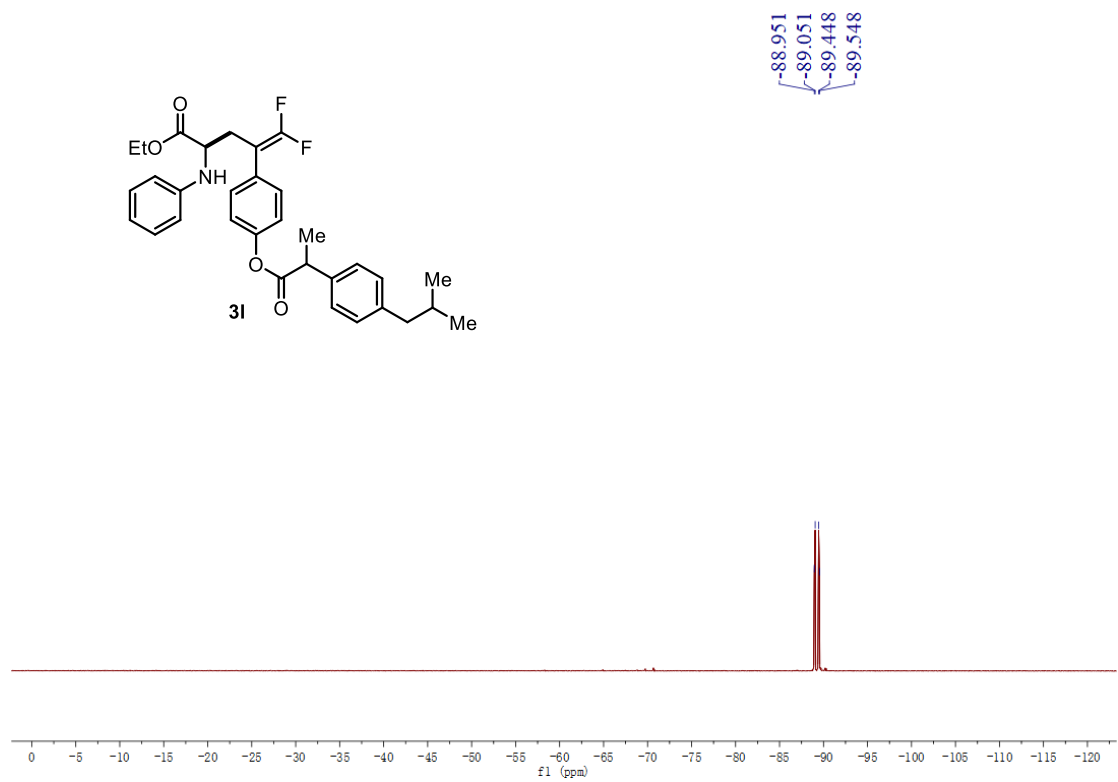

**$^1\text{H}$ ,  $^{13}\text{C}$  NMR and  $^{19}\text{F}$  spectra for compound 3m (Chloroform-d)**

8.081  
8.060  
7.397  
7.377  
7.129  
7.111  
7.093  
6.739  
6.721  
6.703  
6.457  
6.438  
4.705  
4.702  
4.673  
4.664  
4.660  
4.644  
4.640  
4.467  
4.365  
4.359  
4.336  
4.330  
4.277  
4.258  
4.074  
4.055  
4.038  
4.021  
4.004  
3.995  
3.979  
3.950  
3.827  
3.795  
2.930  
1.558  
1.470  
1.390  
1.351  
1.216  
1.196  
1.178

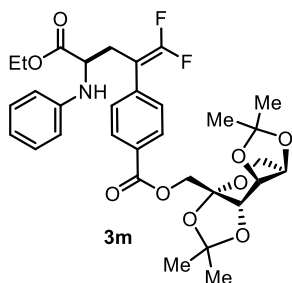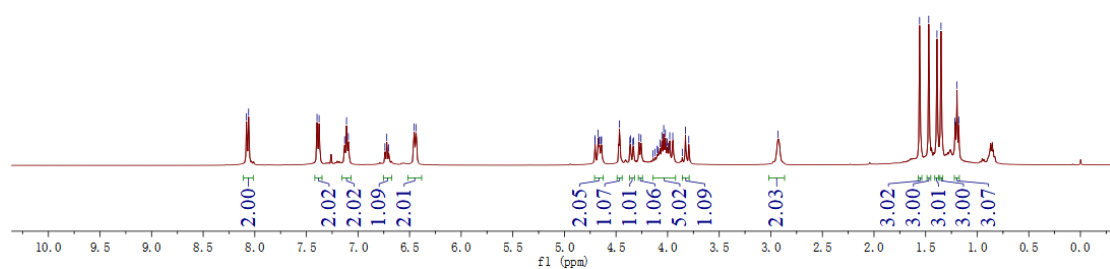

172.807  
165.574  
157.706  
154.821  
154.788  
151.903  
146.112  
137.760  
130.085  
129.412  
128.574  
128.545  
128.515  
118.764  
113.635  
109.278  
108.960  
101.732  
88.944  
88.786  
88.729  
88.572  
70.879  
70.660  
70.184  
65.578  
61.516  
61.457  
55.224  
31.272  
26.629  
25.978  
25.652  
24.109  
-14.171

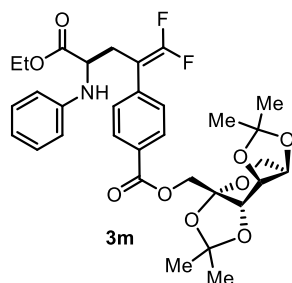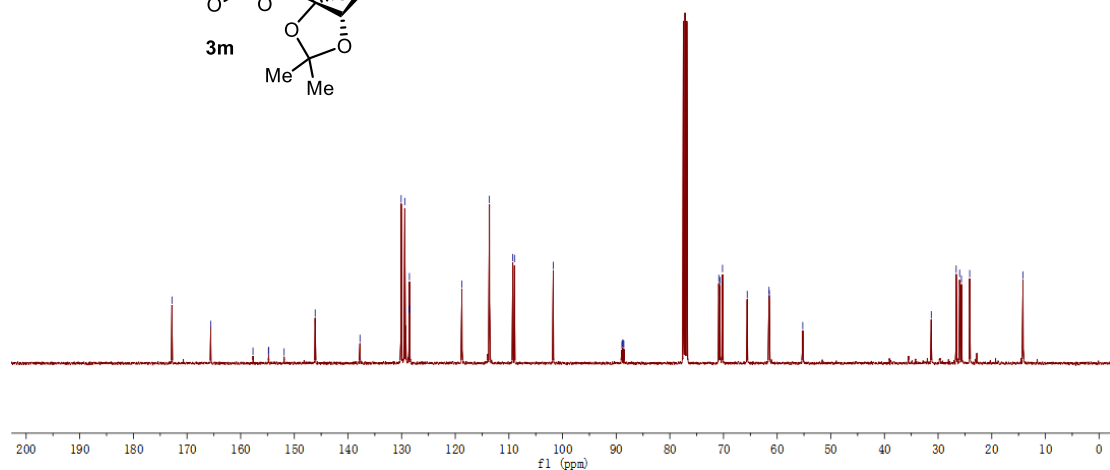

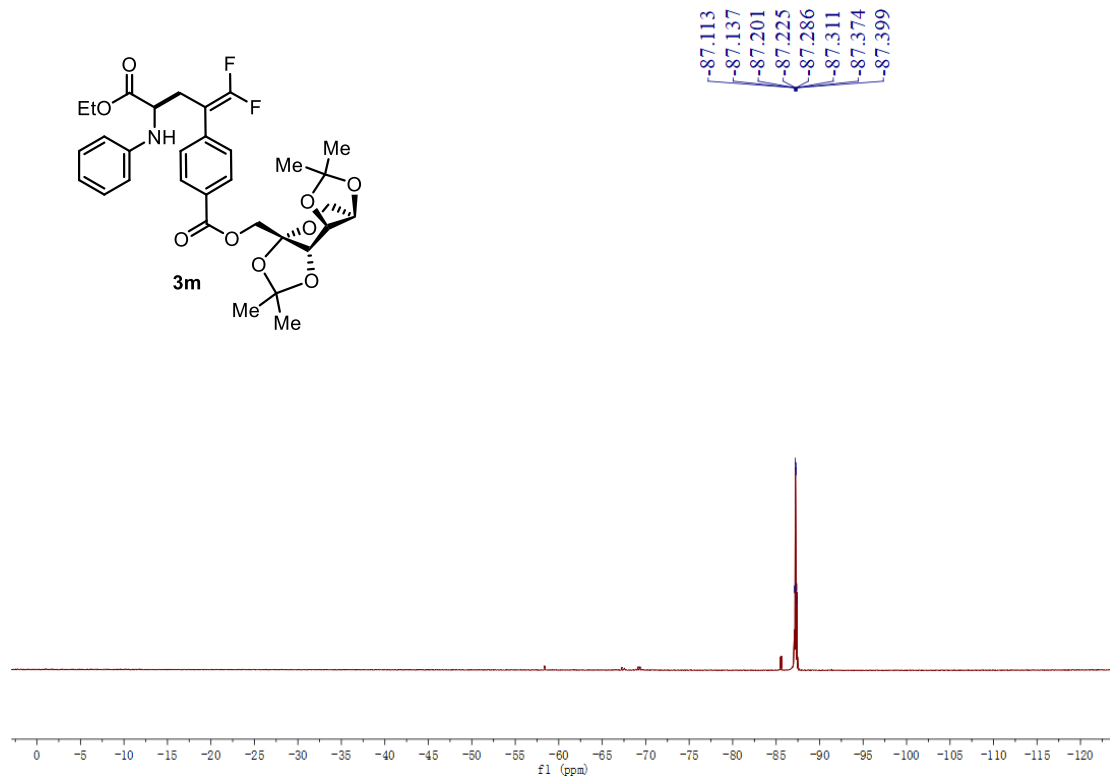

$^1\text{H}$ ,  $^{13}\text{C}$  NMR and  $^{19}\text{F}$  spectra for compound **3n** (Chloroform- $d$ )

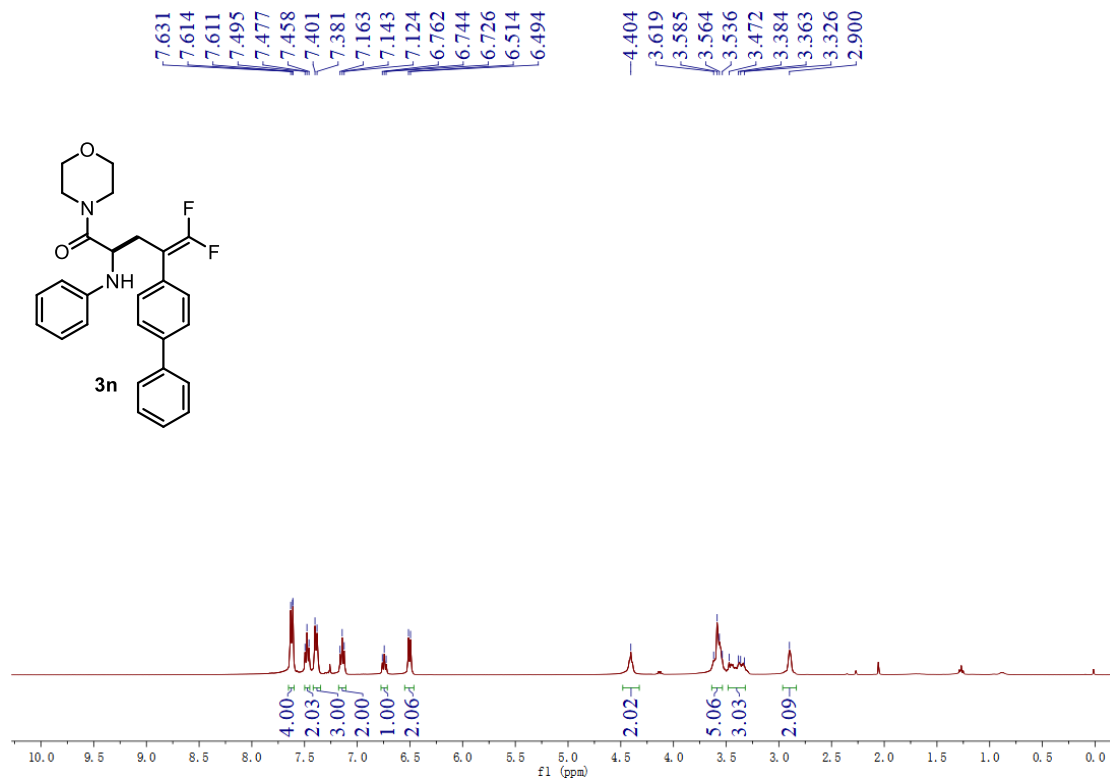

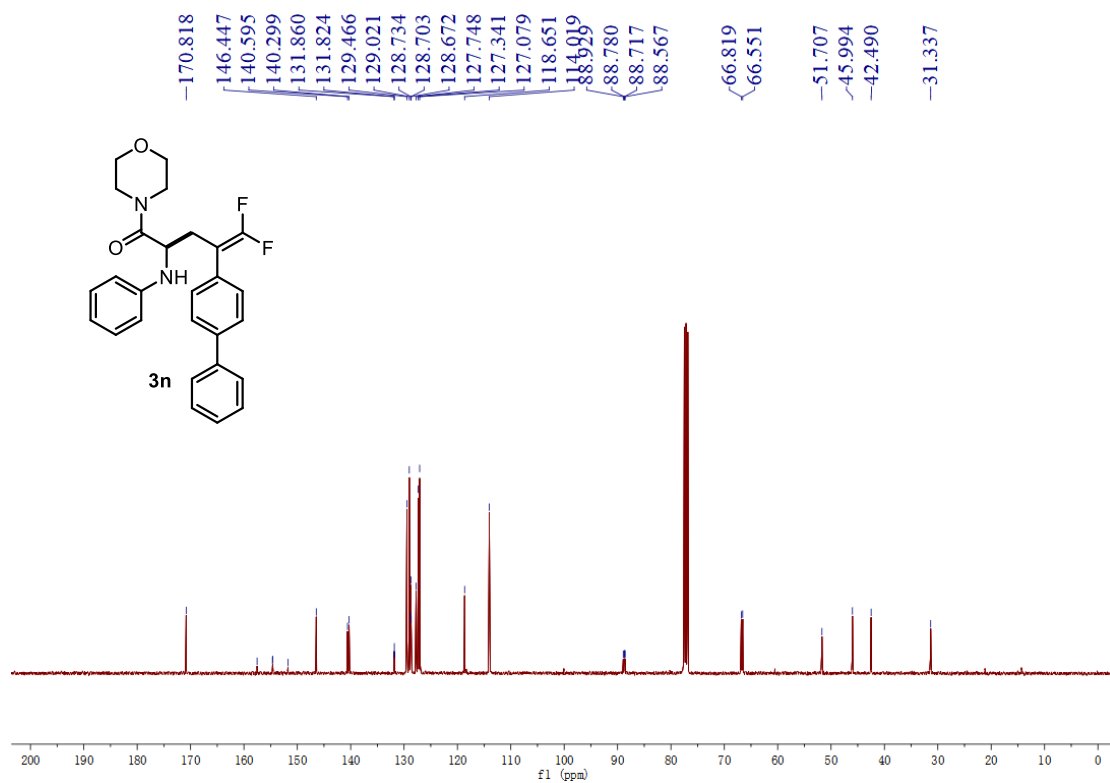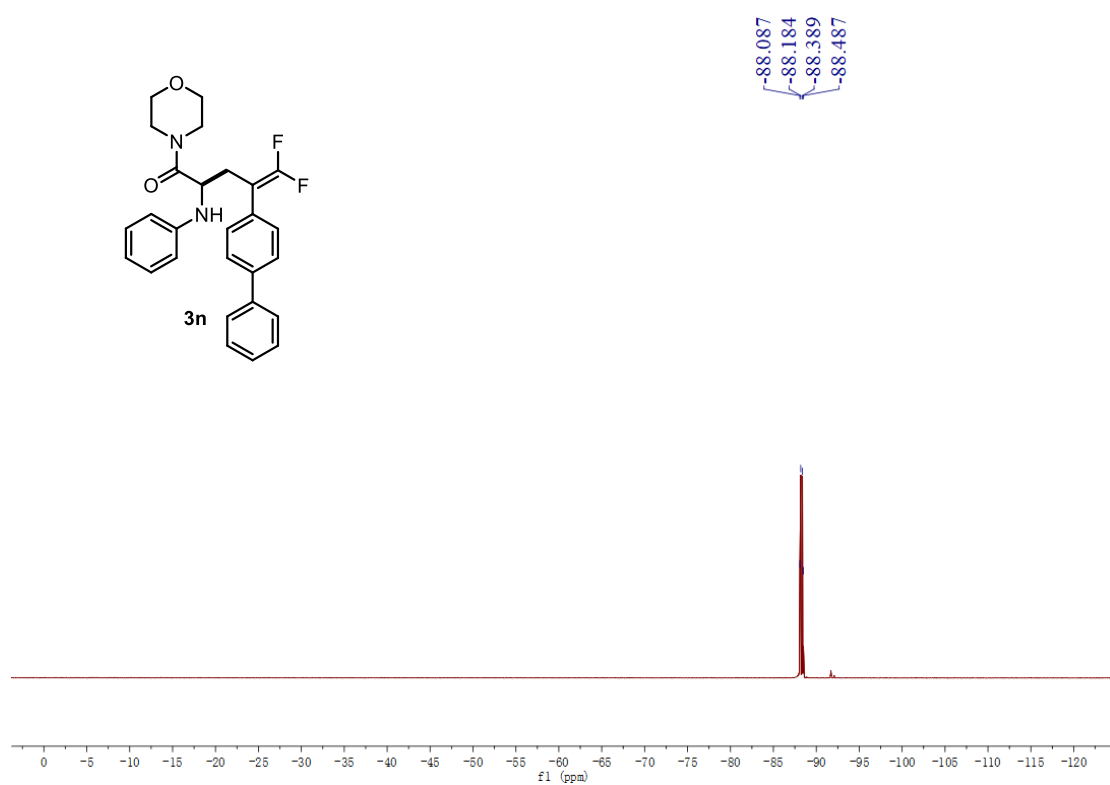

**<sup>1</sup>H, <sup>13</sup>C NMR and <sup>19</sup>F spectra for compound 3o (Chloroform-d)**

7.603  
7.583  
7.567  
7.472  
7.454  
7.435  
7.381  
7.367  
7.349  
7.161  
7.140  
7.121  
6.798  
6.780  
6.762  
6.473  
6.454  
3.905  
3.746  
3.736  
3.727  
3.715  
3.533  
3.507  
3.483  
3.467  
3.446  
3.430  
3.414  
3.170  
3.144  
3.140  
3.133  
2.899  
2.877  
2.863  
2.467  
2.452  
1.427

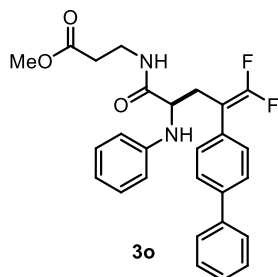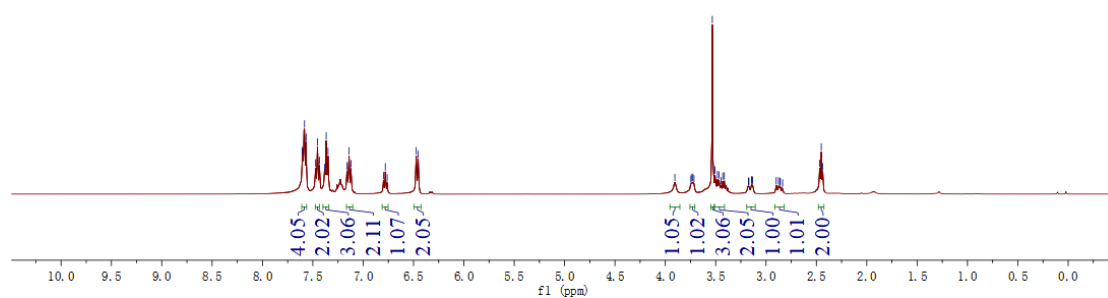

172.552  
172.403  
157.522  
154.657  
154.614  
146.312  
140.765  
140.352  
131.052  
131.015  
129.374  
128.905  
127.463  
127.085  
119.283  
113.695  
89.380  
89.227  
89.173  
89.019  
-57.942  
-51.734  
34.738  
33.671  
31.638

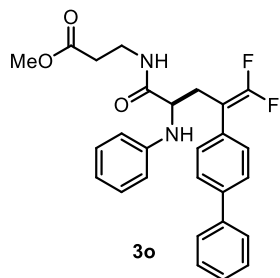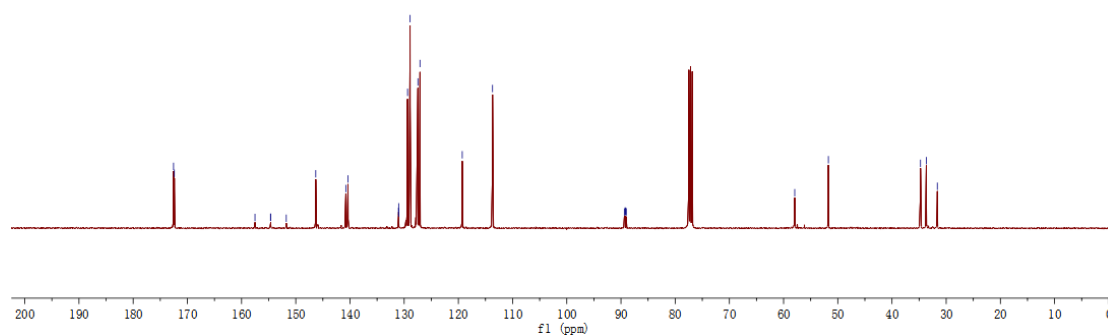

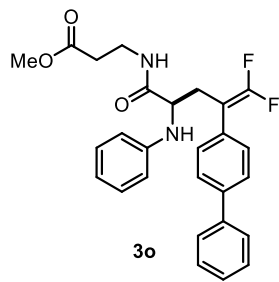

88.027  
88.130  
89.481  
89.585

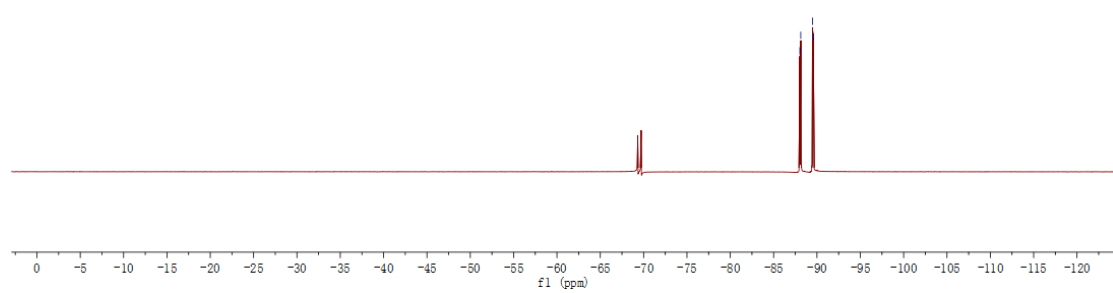

**<sup>1</sup>H, <sup>13</sup>C NMR and <sup>19</sup>F spectra for compound 3p (Chloroform-d)**

8.019  
7.999  
7.986  
7.965  
7.396  
7.386  
7.320  
7.299  
7.277  
7.219  
7.198  
7.160  
7.141  
7.124  
6.419  
6.414  
6.396  
6.377  
6.357  
4.750  
4.728  
4.705  
4.686  
4.494  
4.393  
4.364  
4.322  
4.302  
4.172  
4.154  
3.996  
3.868  
3.708  
3.675  
3.307  
2.084  
1.599  
1.503  
1.424  
1.412  
1.396  
1.318  
1.300  
1.282

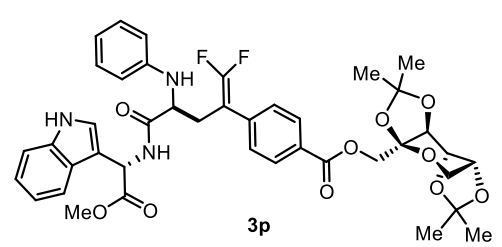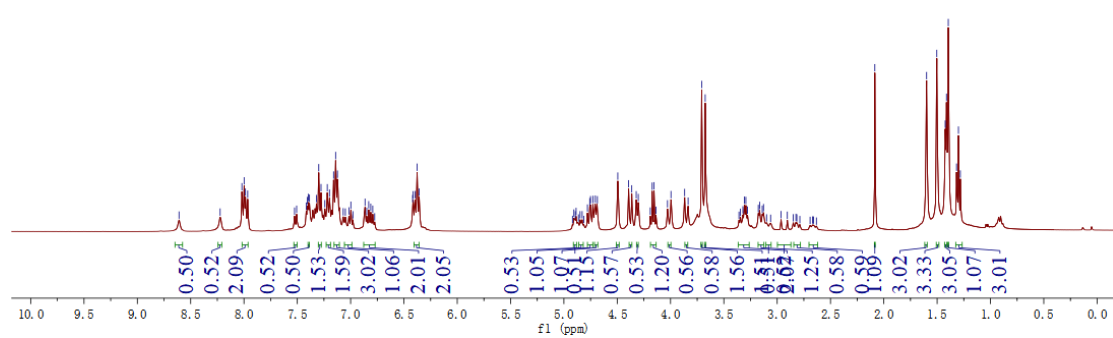

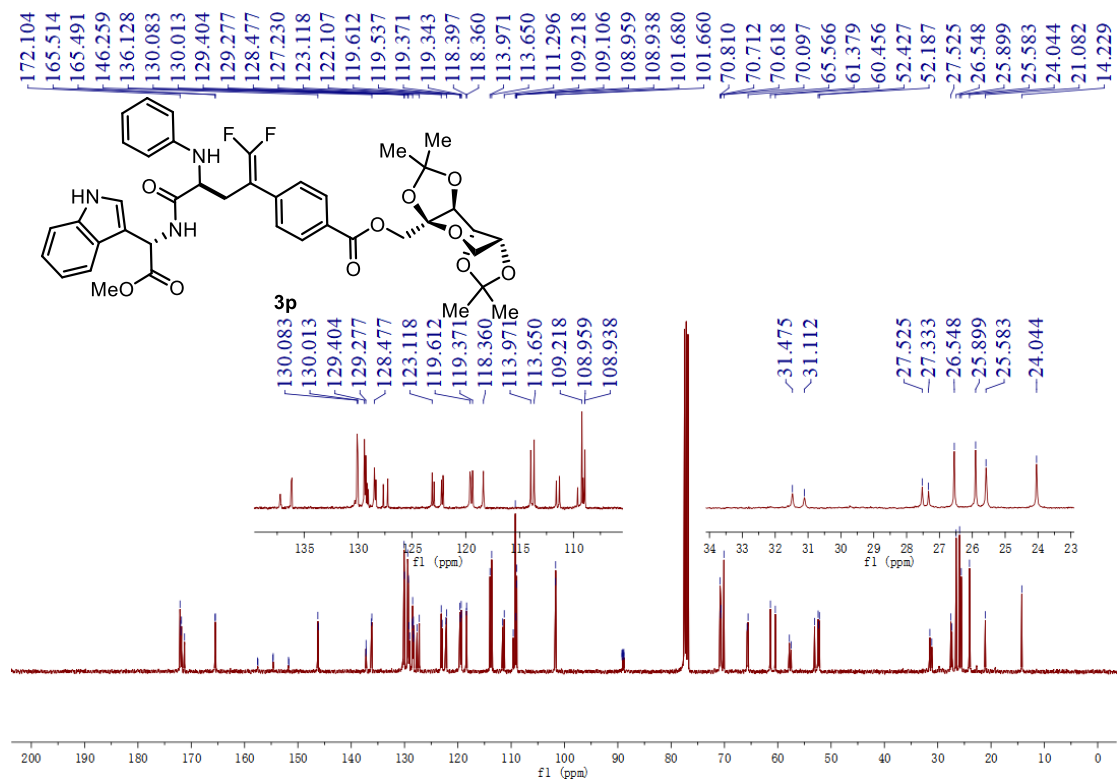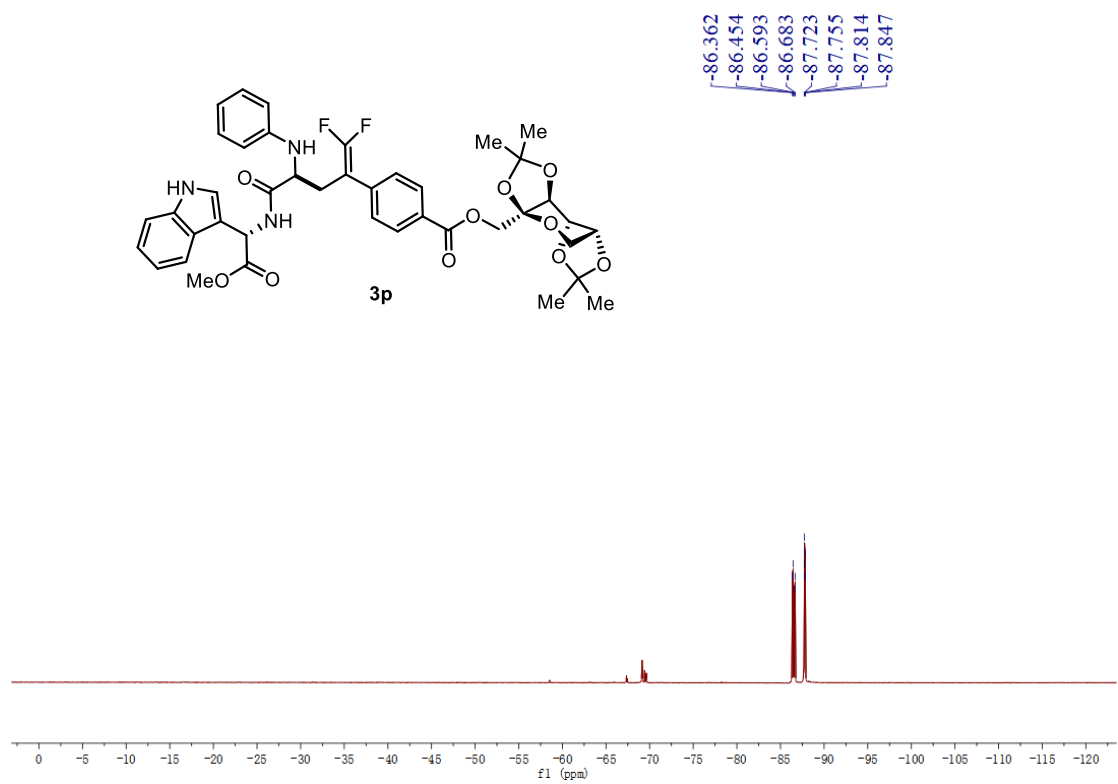



**<sup>1</sup>H, <sup>13</sup>C NMR and <sup>19</sup>F spectra for compound 5a (Chloroform-d)**

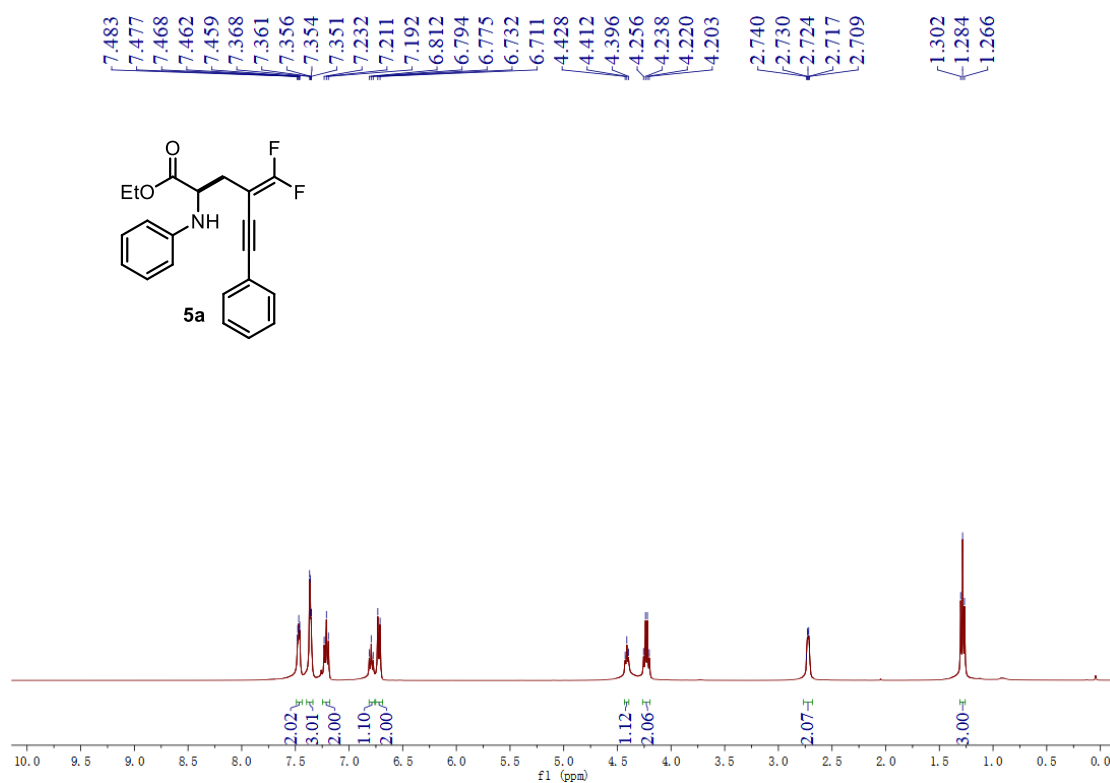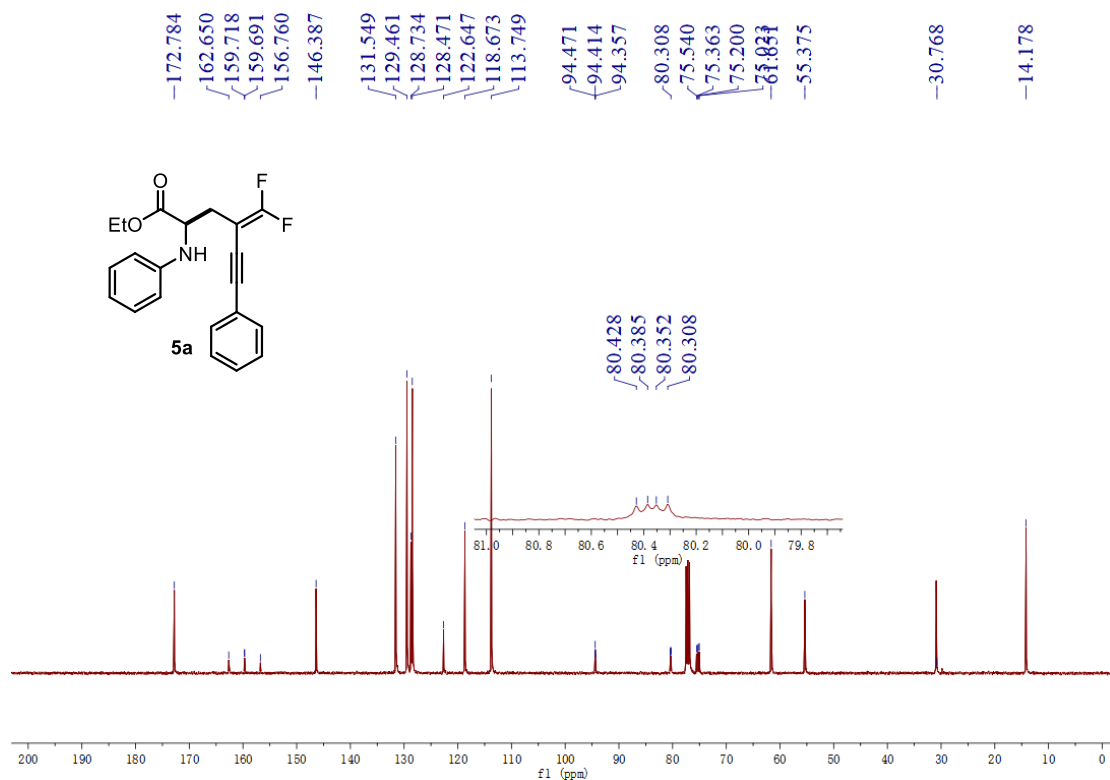

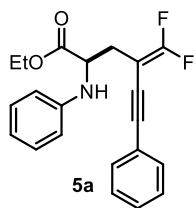

$\{$ -77.279  
 $\{$ -77.309  
 $\{$ -83.093  
 $\{$ -83.123

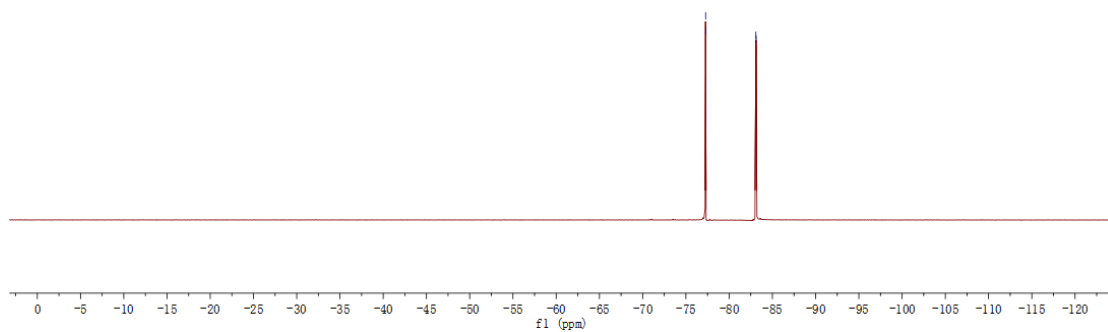

**$^1\text{H}$ ,  $^{13}\text{C}$  NMR and  $^{19}\text{F}$  spectra for compound **5b** (Chloroform-d)**

$\{$ 7.372  
 $\{$ 7.352  
 $\{$ 7.202  
 $\{$ 7.198  
 $\{$ 7.180  
 $\{$ 7.161  
 $\{$ 7.159  
 $\{$ 6.781  
 $\{$ 6.762  
 $\{$ 6.744  
 $\{$ 6.700  
 $\{$ 6.681  
 $\{$ 4.390  
 $\{$ 4.374  
 $\{$ 4.358  
 $\{$ 4.230  
 $\{$ 4.212  
 $\{$ 4.194  
 $\{$ 4.177  
 $\{$ 2.691  
 $\{$ 2.672  
 $\{$ 2.652  
 $\{$ 2.634  
 $\{$ 1.278  
 $\{$ 1.261  
 $\{$ 1.243  
 $\{$ 1.225

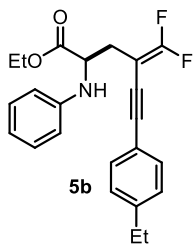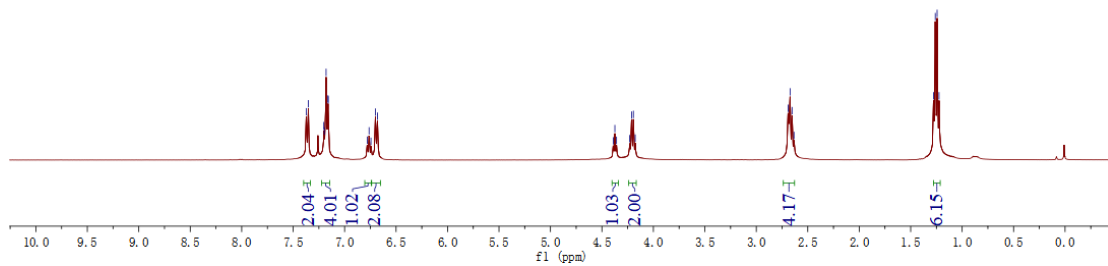

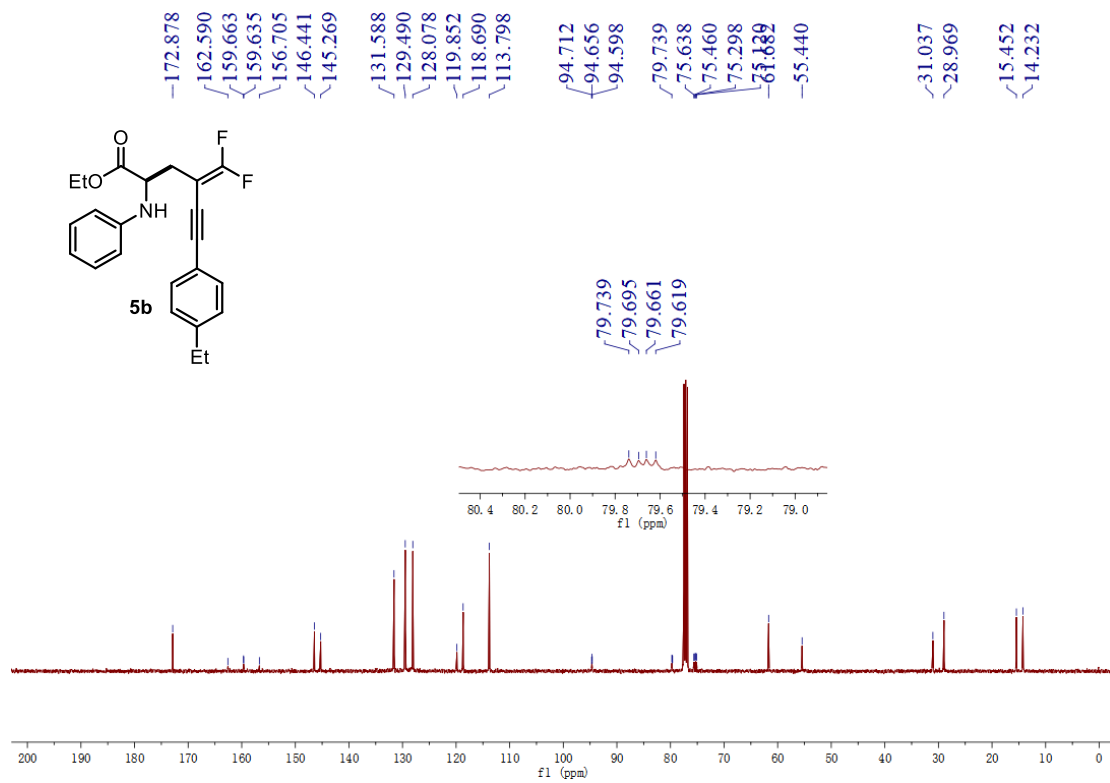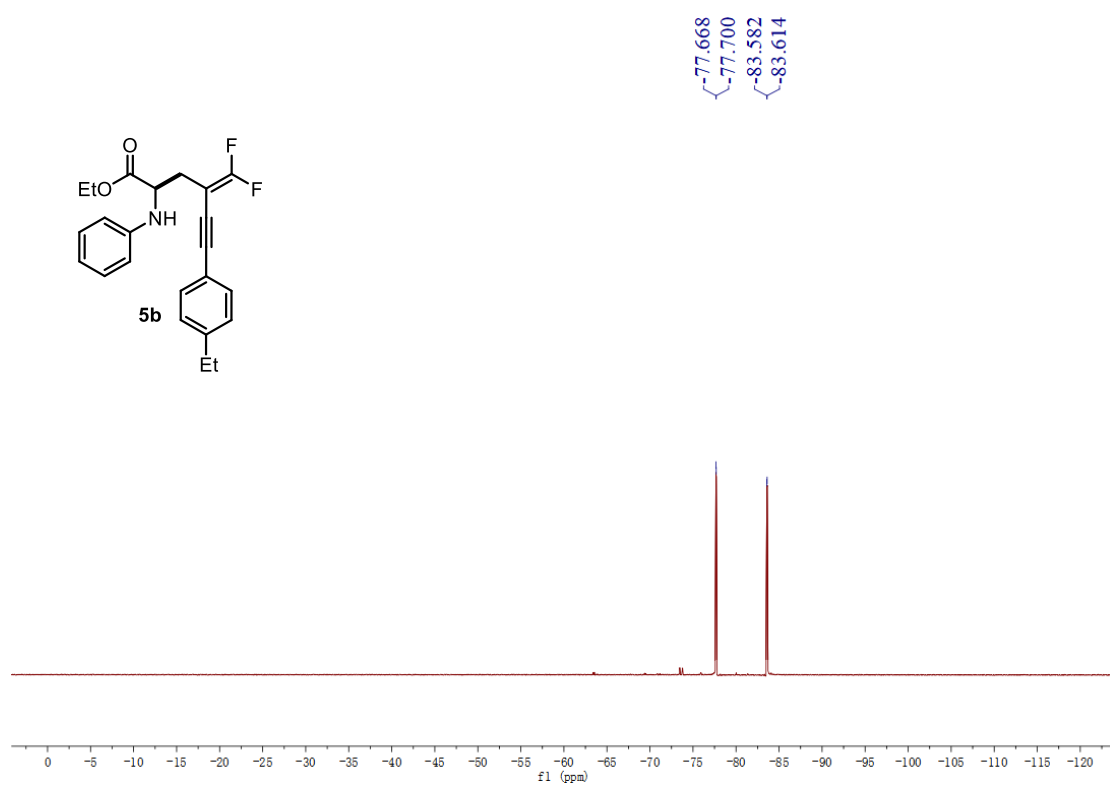

**<sup>1</sup>H, <sup>13</sup>C NMR and <sup>19</sup>F spectra for compound 5c (Chloroform-d)**

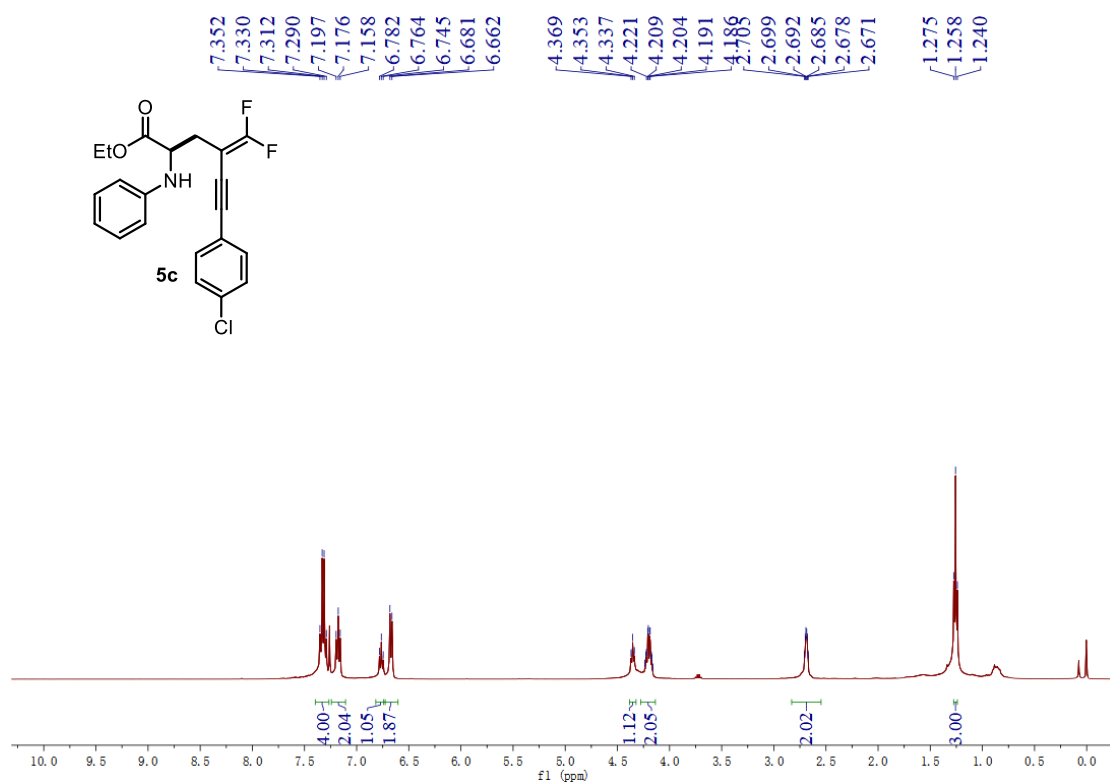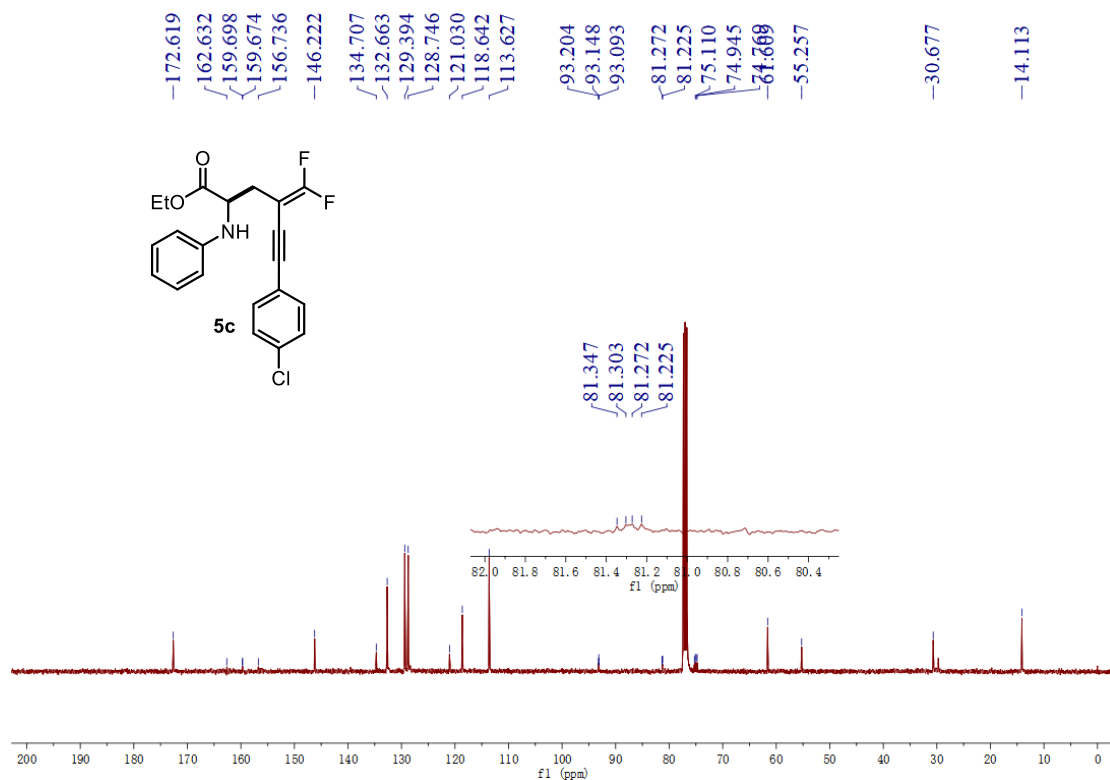

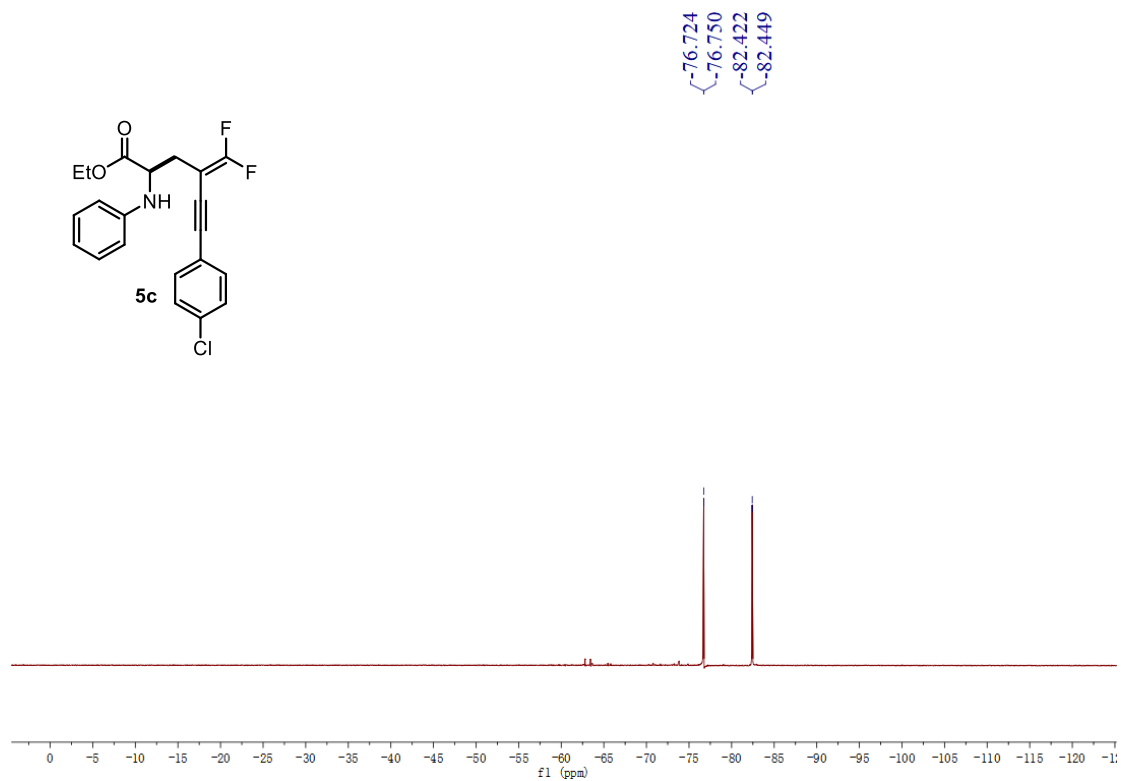

**$^1\text{H}$ ,  $^{13}\text{C}$  NMR and  $^{19}\text{F}$  spectra for compound **5d** (Chloroform-d)**

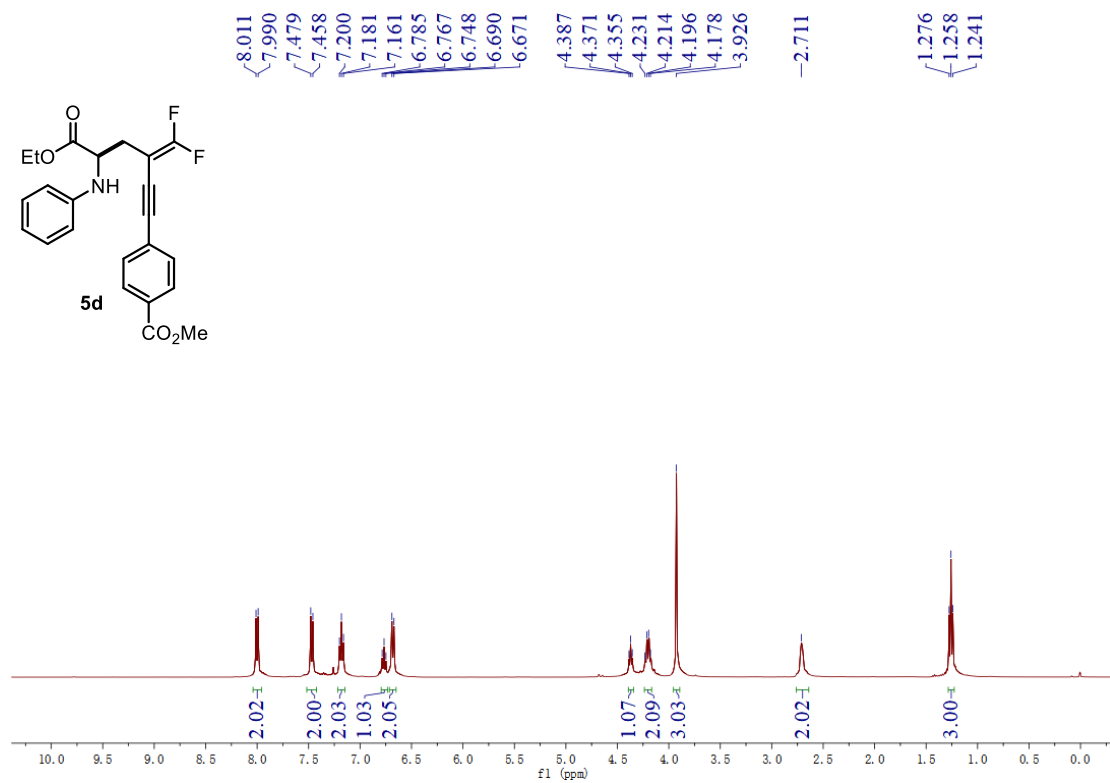

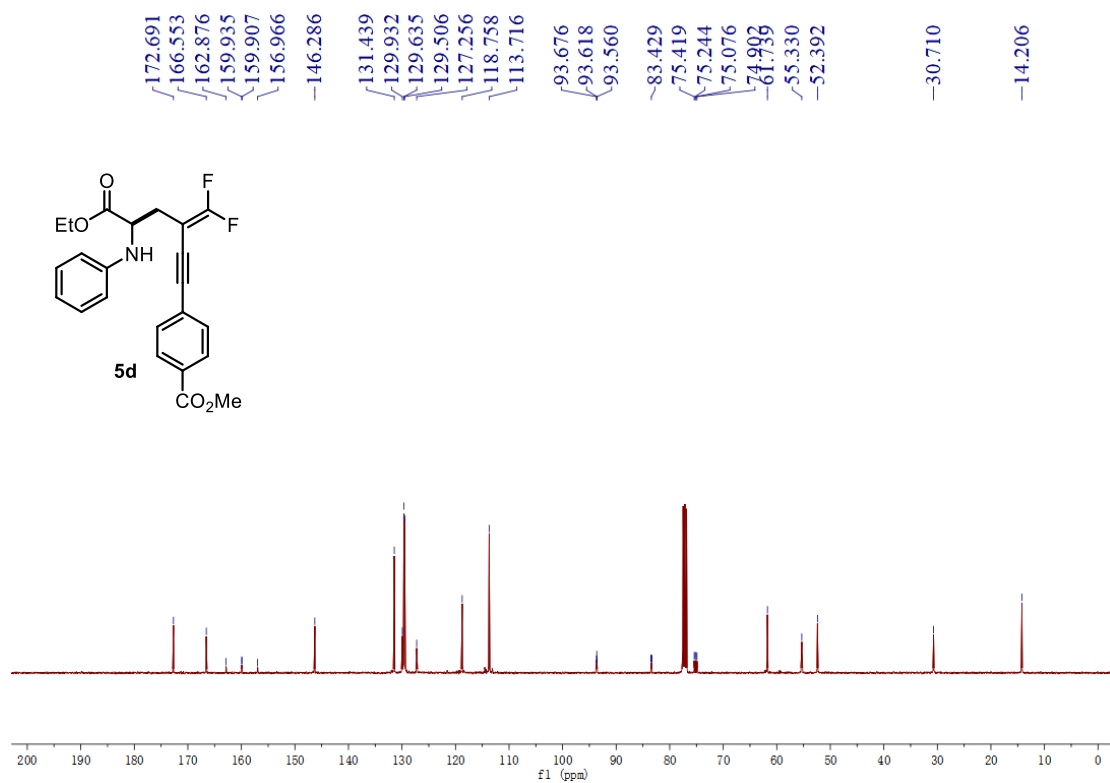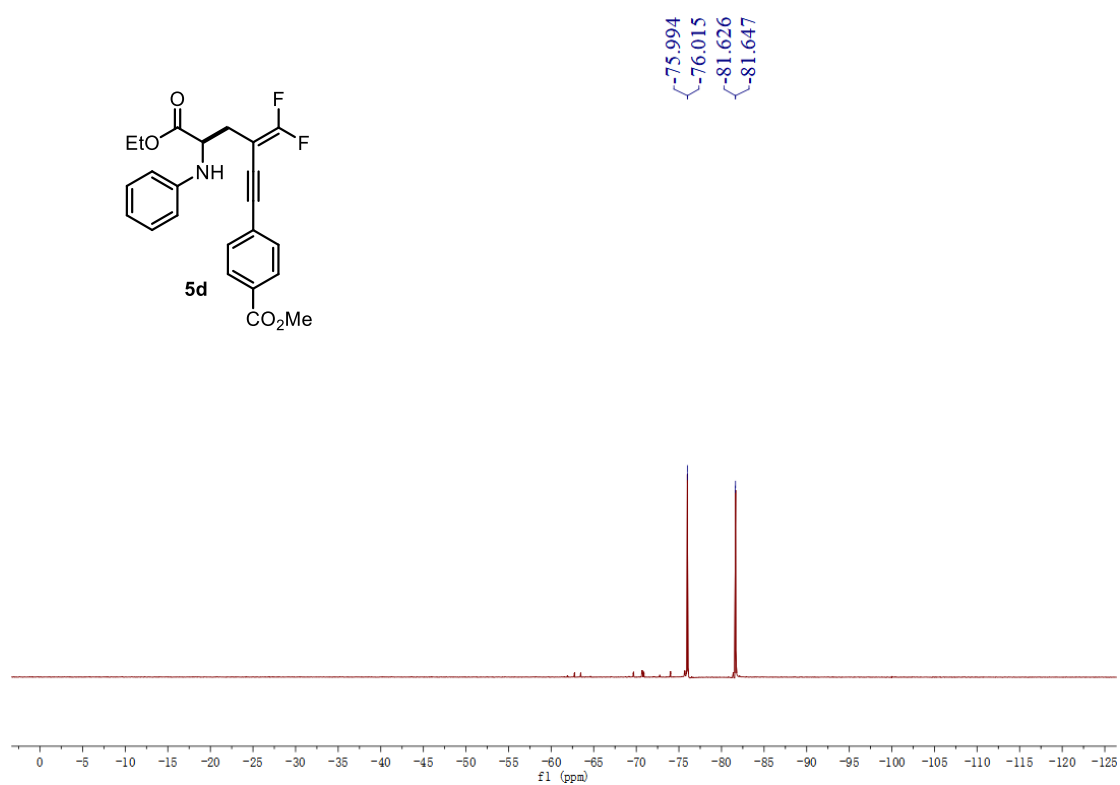

**<sup>1</sup>H, <sup>13</sup>C NMR and <sup>19</sup>F spectra for compound 5e (Chloroform-d)**

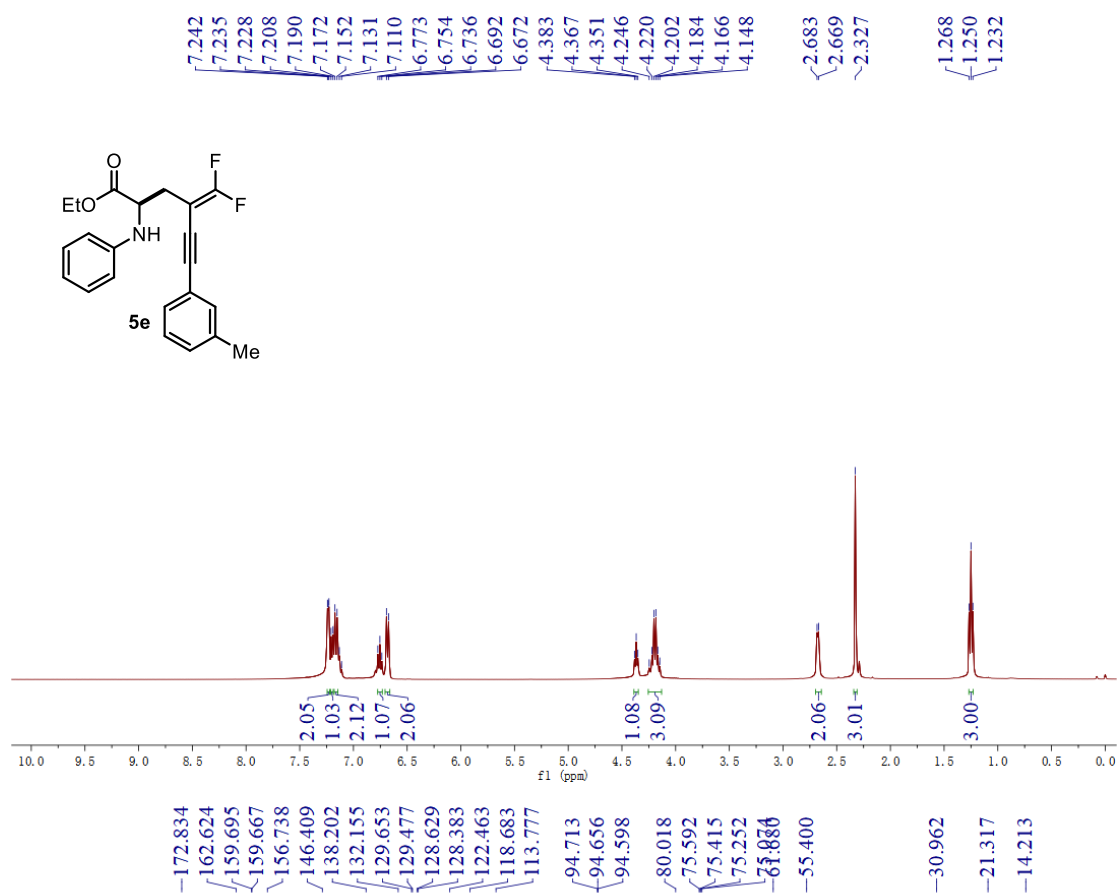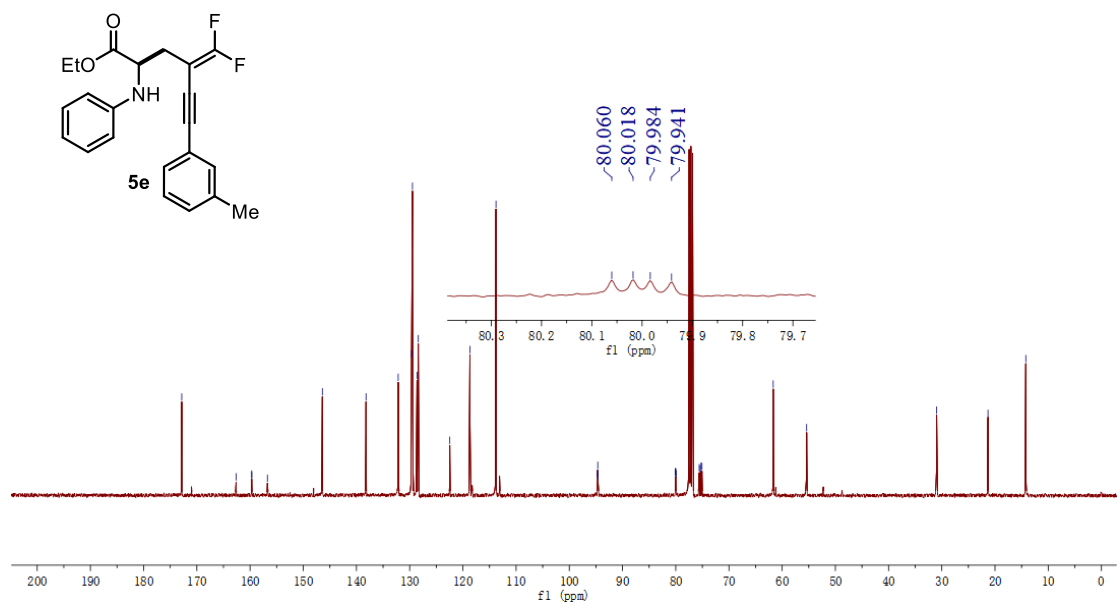

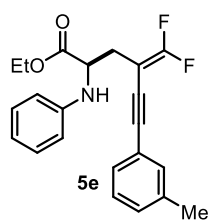

77.457  
77.488  
83.303  
83.334

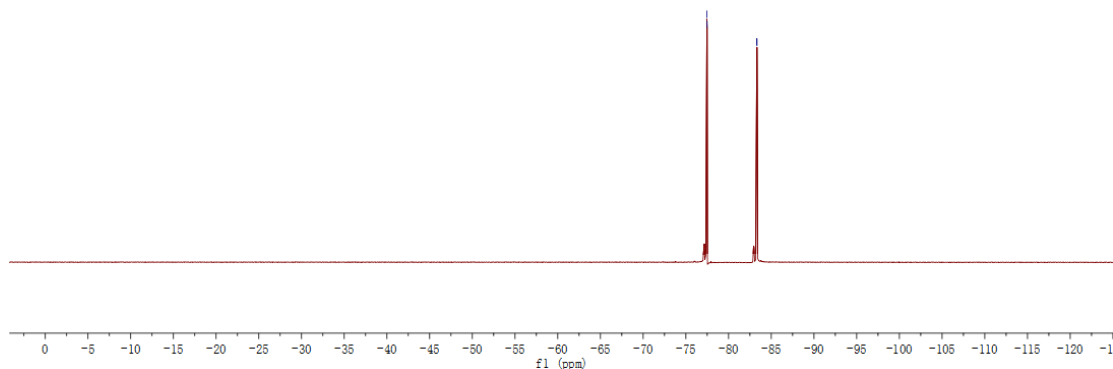

**<sup>1</sup>H, <sup>13</sup>C NMR and <sup>19</sup>F spectra for compound 5f (Chloroform-d)**

7.376  
7.362  
7.360  
7.311  
7.291  
7.272  
7.260  
7.241  
7.221  
6.892  
6.874  
6.855  
6.808  
6.799  
6.793  
6.778  
4.493  
4.389  
4.338  
4.320  
4.303  
4.285  
-2.817  
1.379  
1.362  
1.344

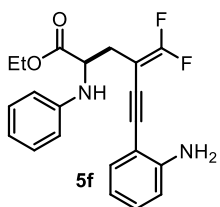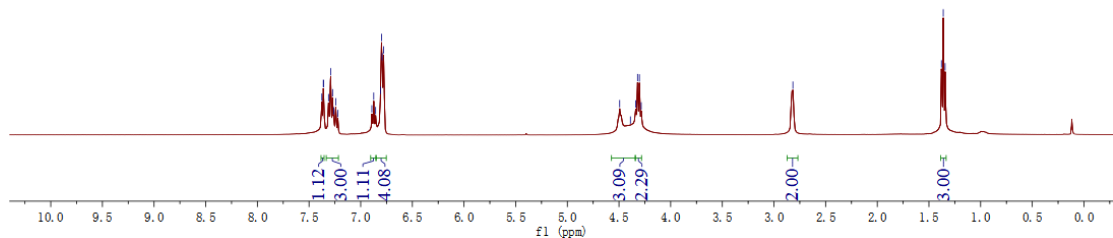



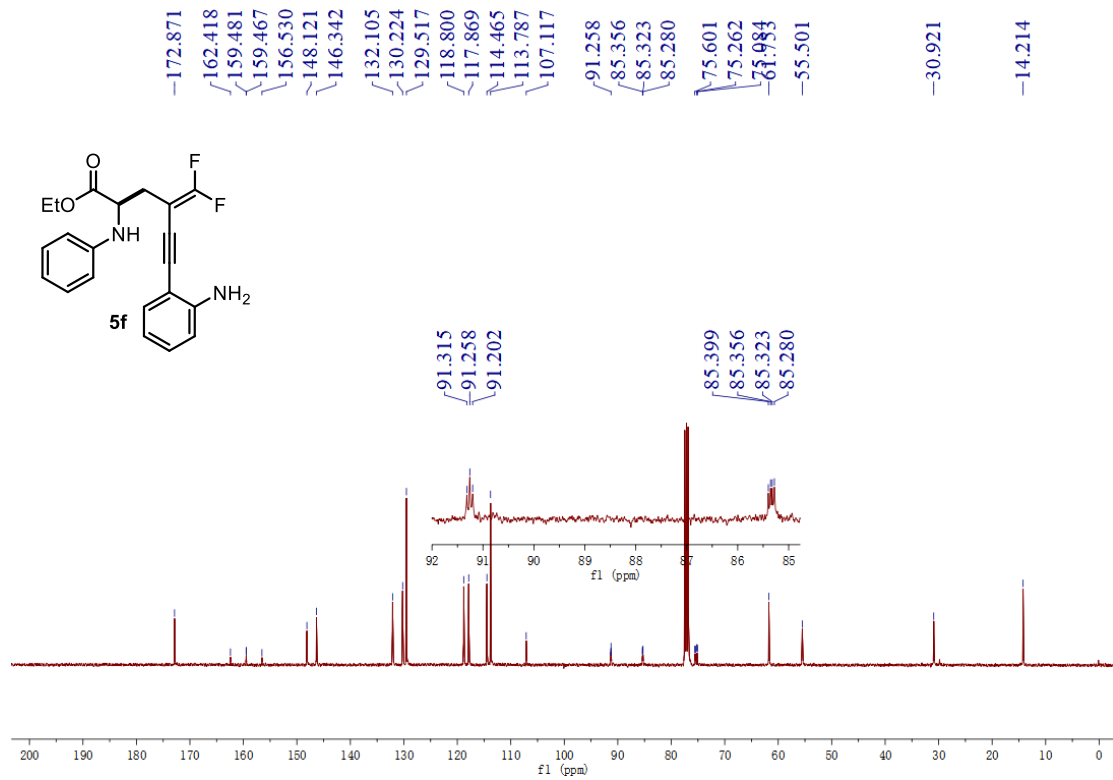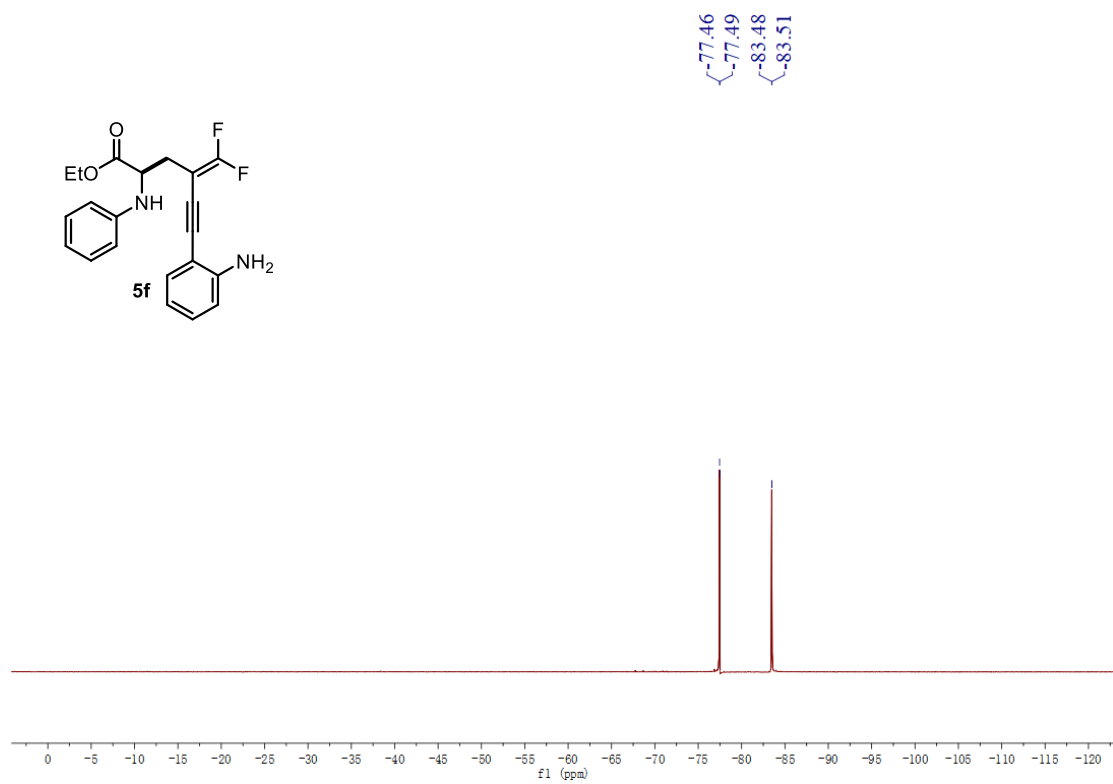

**<sup>1</sup>H, <sup>13</sup>C NMR and <sup>19</sup>F spectra for compound 5g (Chloroform-d)**

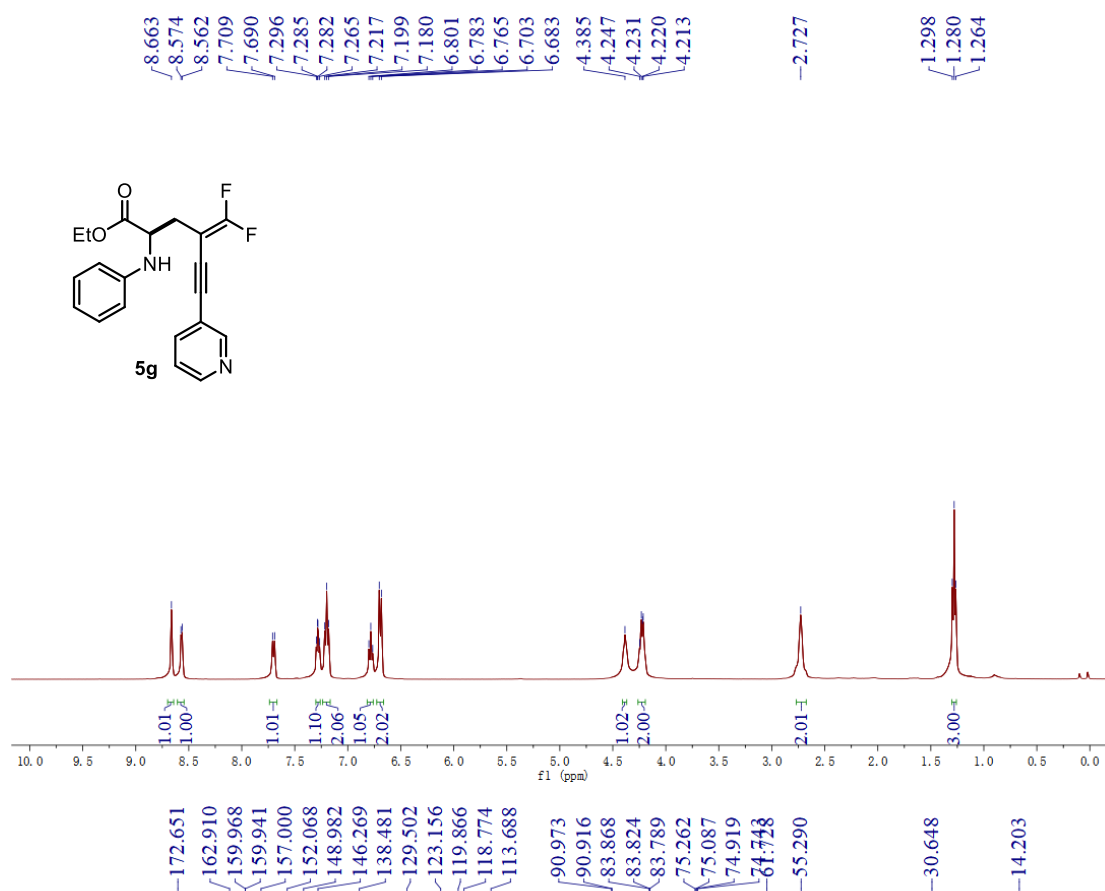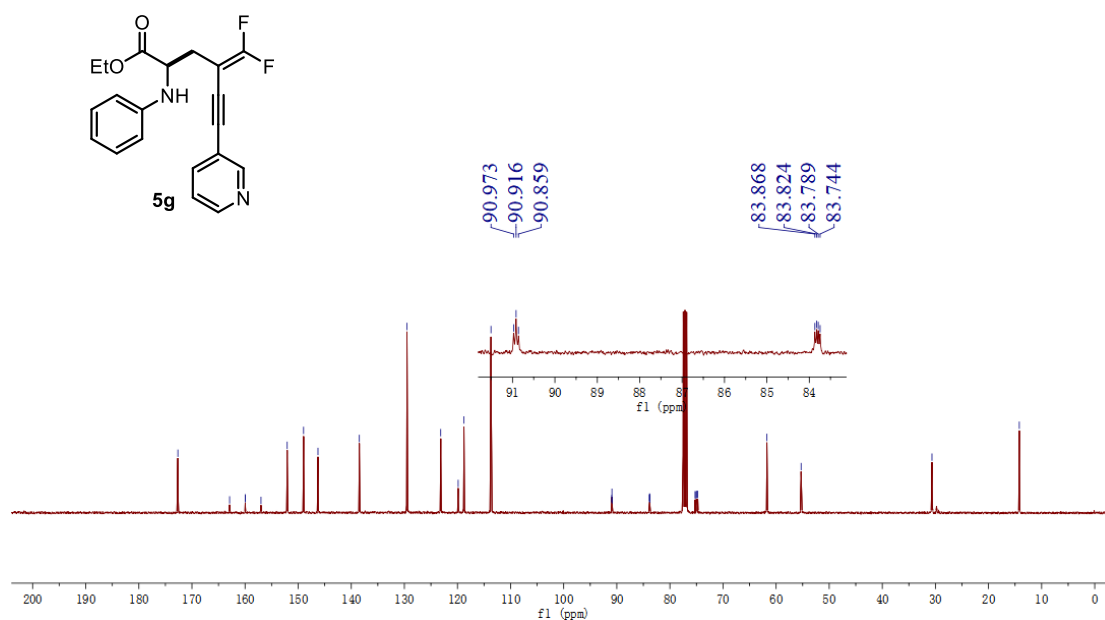

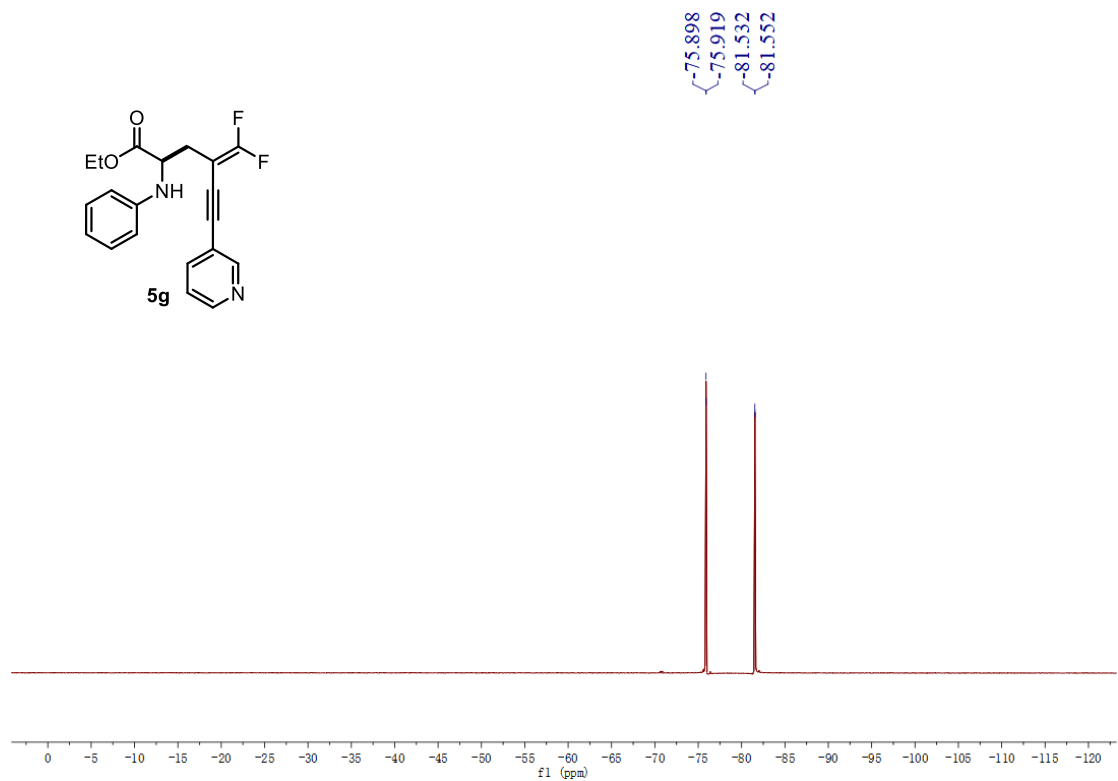

**<sup>1</sup>H, <sup>13</sup>C NMR and <sup>19</sup>F spectra for compound 5h (Chloroform-d)**

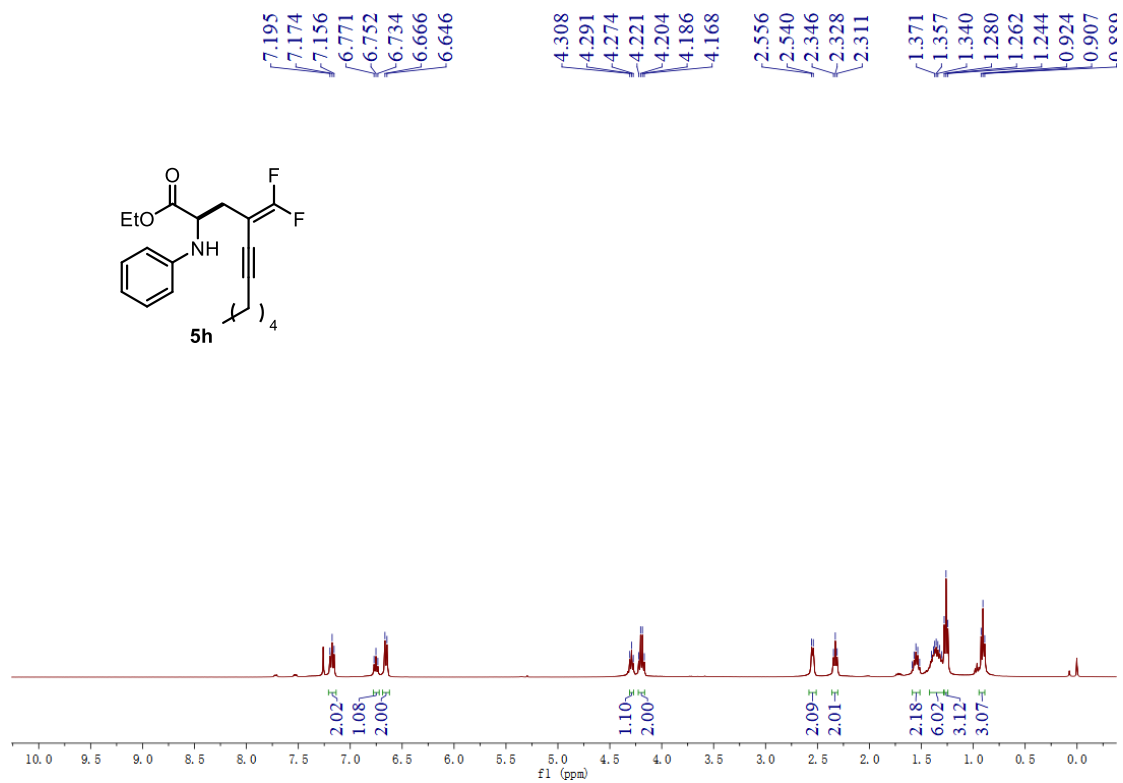

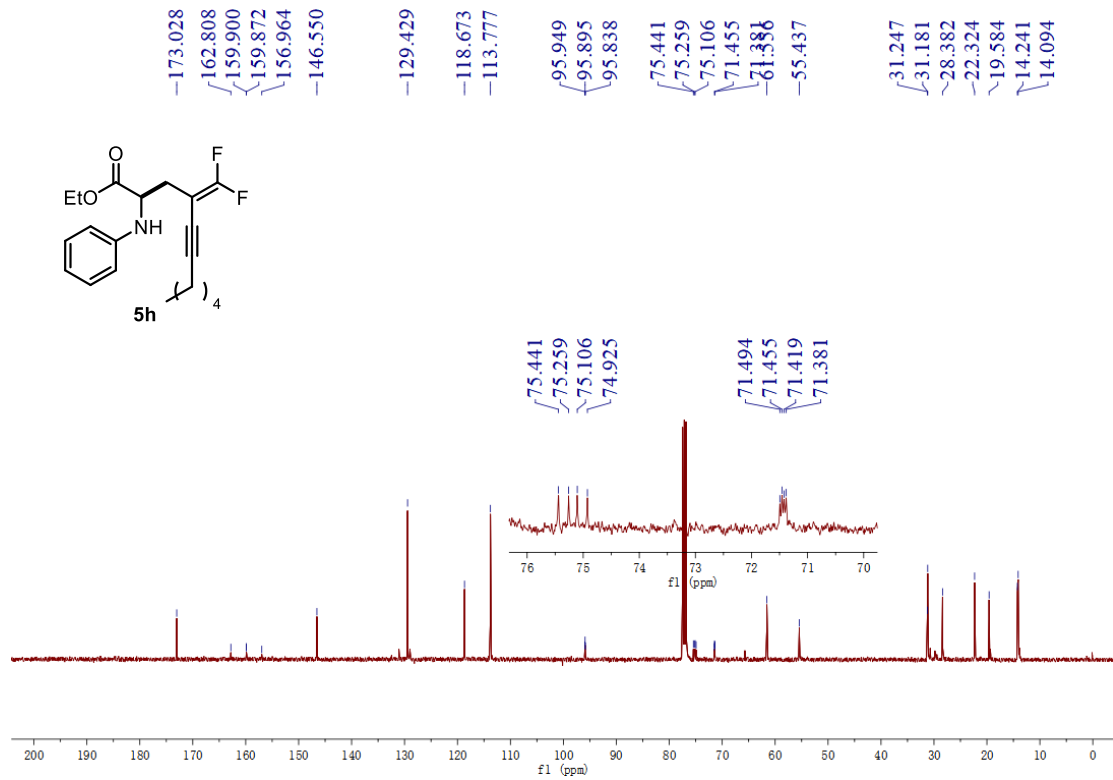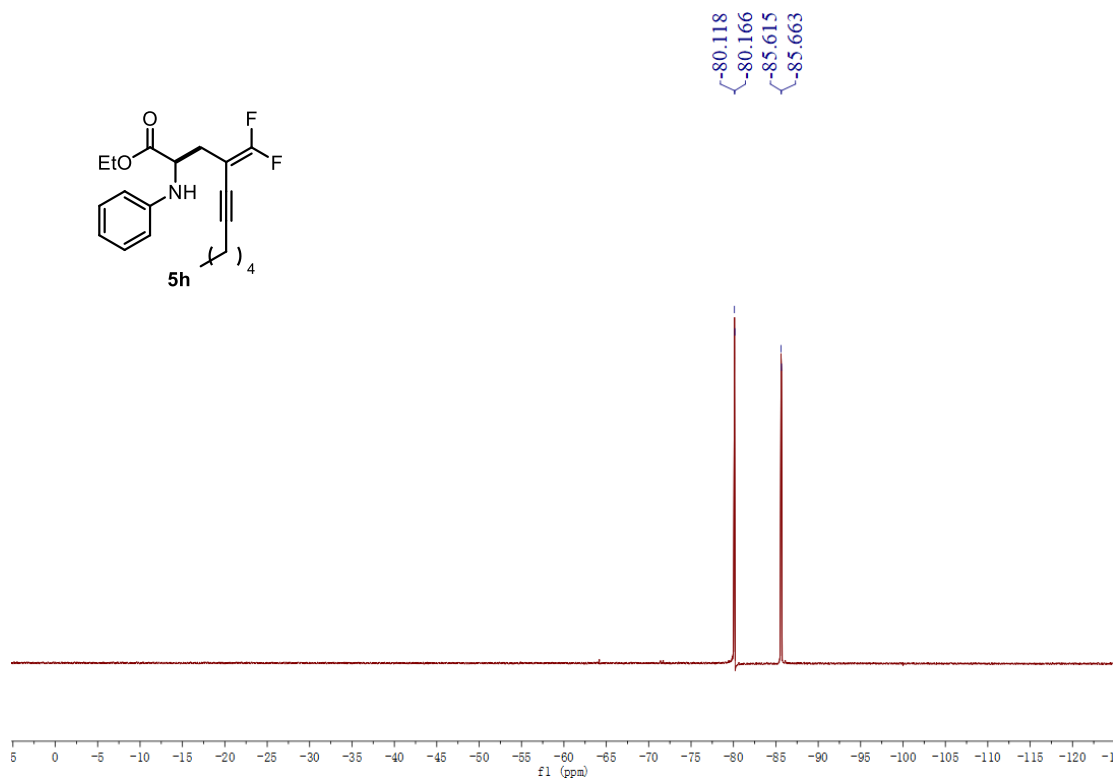

**$^1\text{H}$ ,  $^{13}\text{C}$  NMR and  $^{19}\text{F}$  spectra for compound 5i (Chloroform-d)**

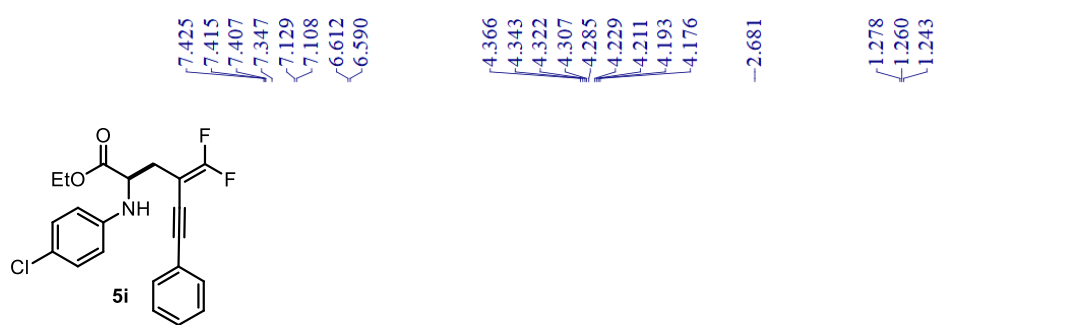

$^1\text{H}$  NMR peaks (ppm): 7.425, 7.415, 7.407, 7.347, 7.129, 7.108, 6.612, 6.590, 4.366, 4.343, 4.322, 4.307, 4.285, 4.229, 4.211, 4.193, 4.176, -2.681, 1.278, 1.260, 1.243

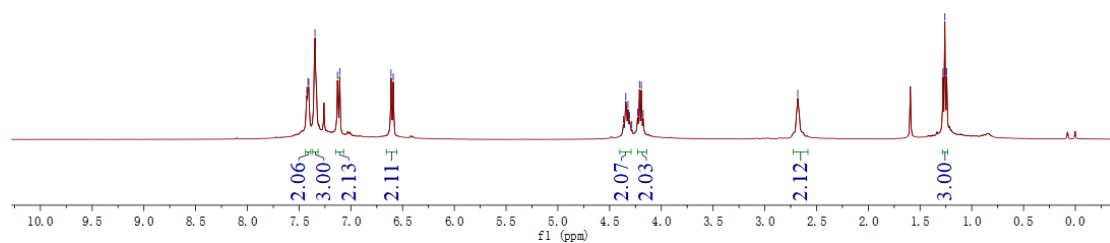

$^{13}\text{C}$  NMR peaks (ppm): 172.530, 162.690, 159.756, 159.729, 156.796, 145.000, 131.559, 129.350, 128.867, 128.552, 123.338, 122.543, 114.874, 94.576, 94.518, 94.461, 80.177, 75.369, 75.191, 75.029, 61.883, 55.453, 30.766, 14.236

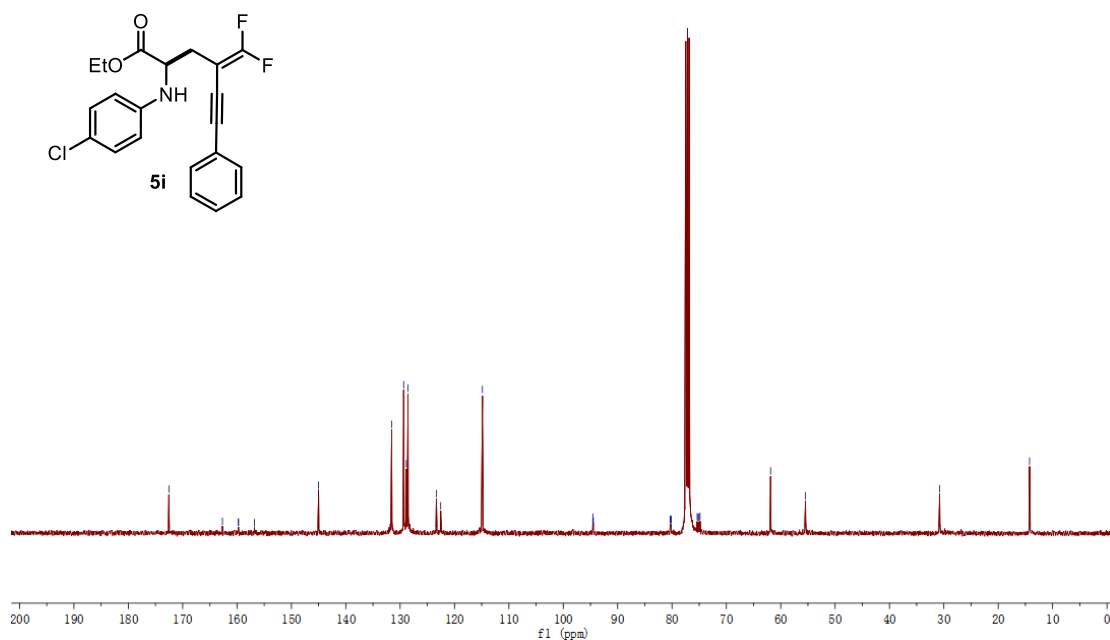

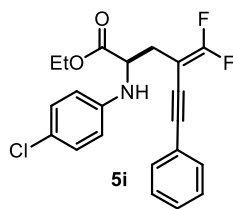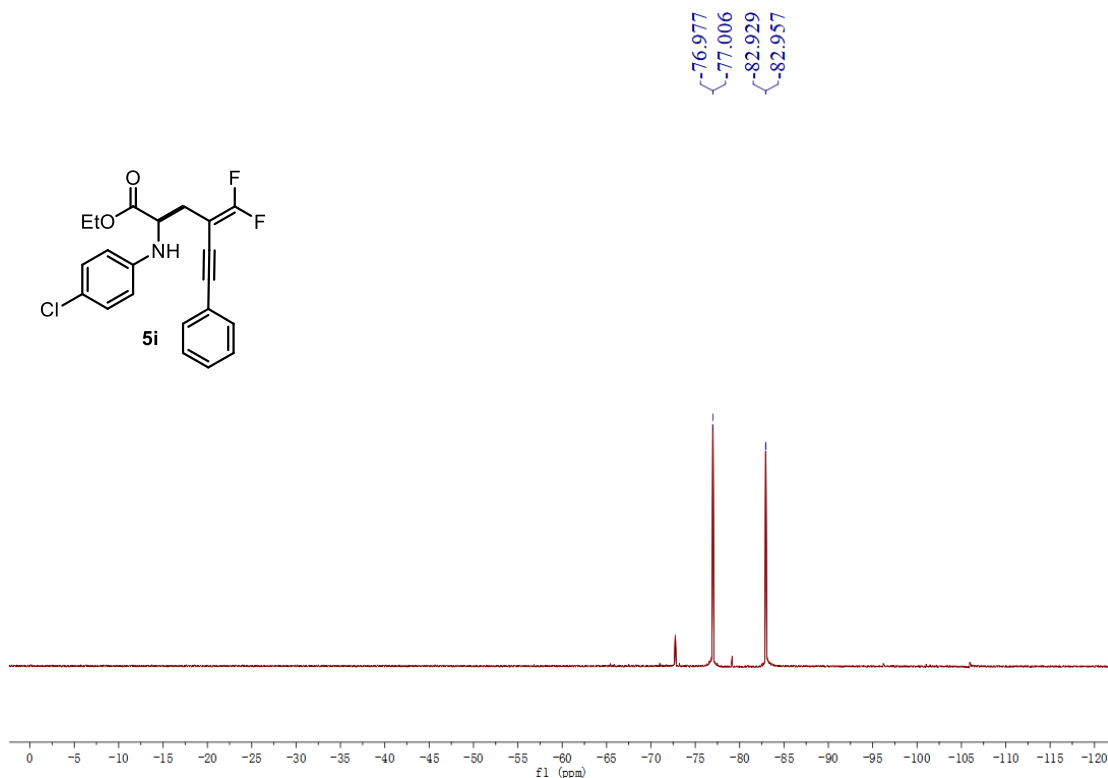

**$^1\text{H}$ ,  $^{13}\text{C}$  NMR and  $^{19}\text{F}$  spectra for compound **5j** (Chloroform- $d$ )**

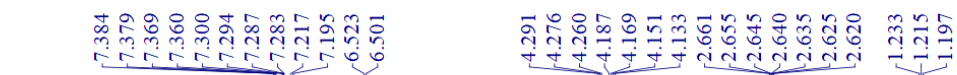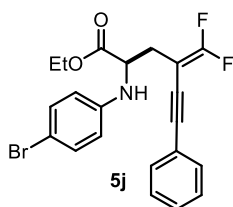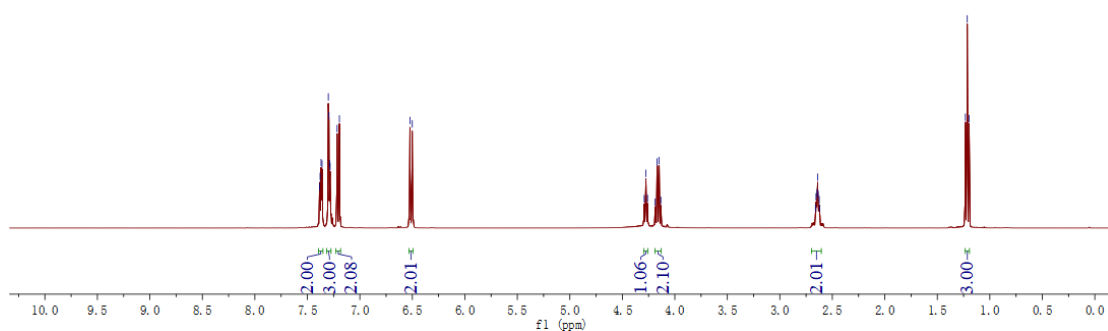

-172.414  
 -162.639  
 -159.704  
 -159.678  
 -156.742  
 -145.398

-132.168  
 -131.507  
 -128.823  
 -128.506  
 -122.487  
 -115.272  
 -110.325

-94.557  
 -94.501  
 -94.443

-80.182  
 -75.336  
 -75.159  
 -74.997  
 -74.888  
 -55.254

-30.649

-14.185

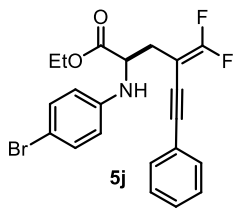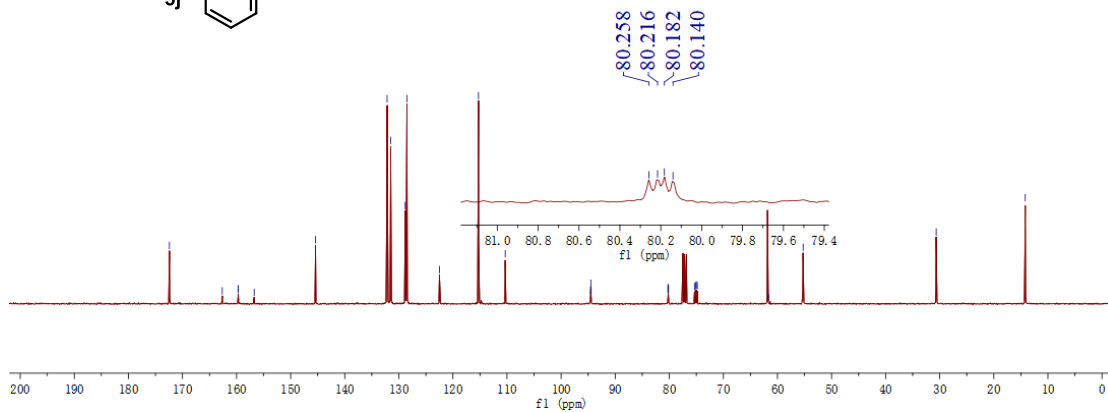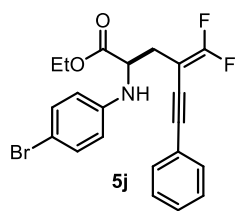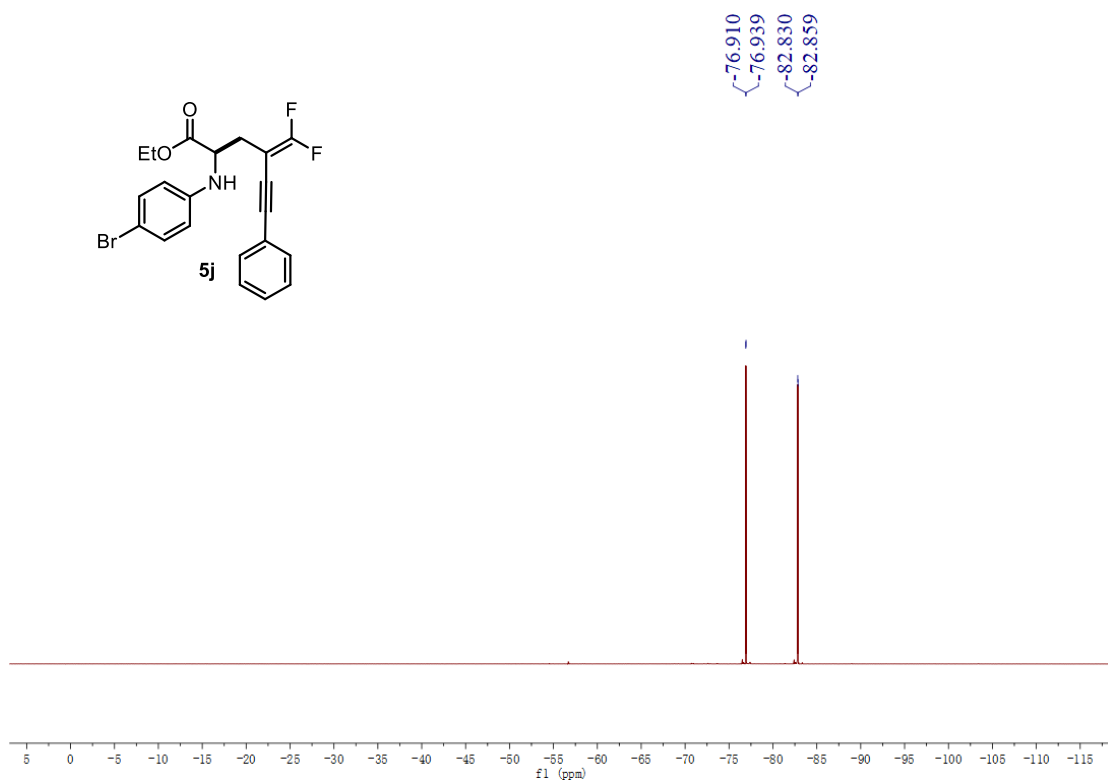

**<sup>1</sup>H, <sup>13</sup>C NMR and <sup>19</sup>F spectra for compound 5k (Chloroform-d)**

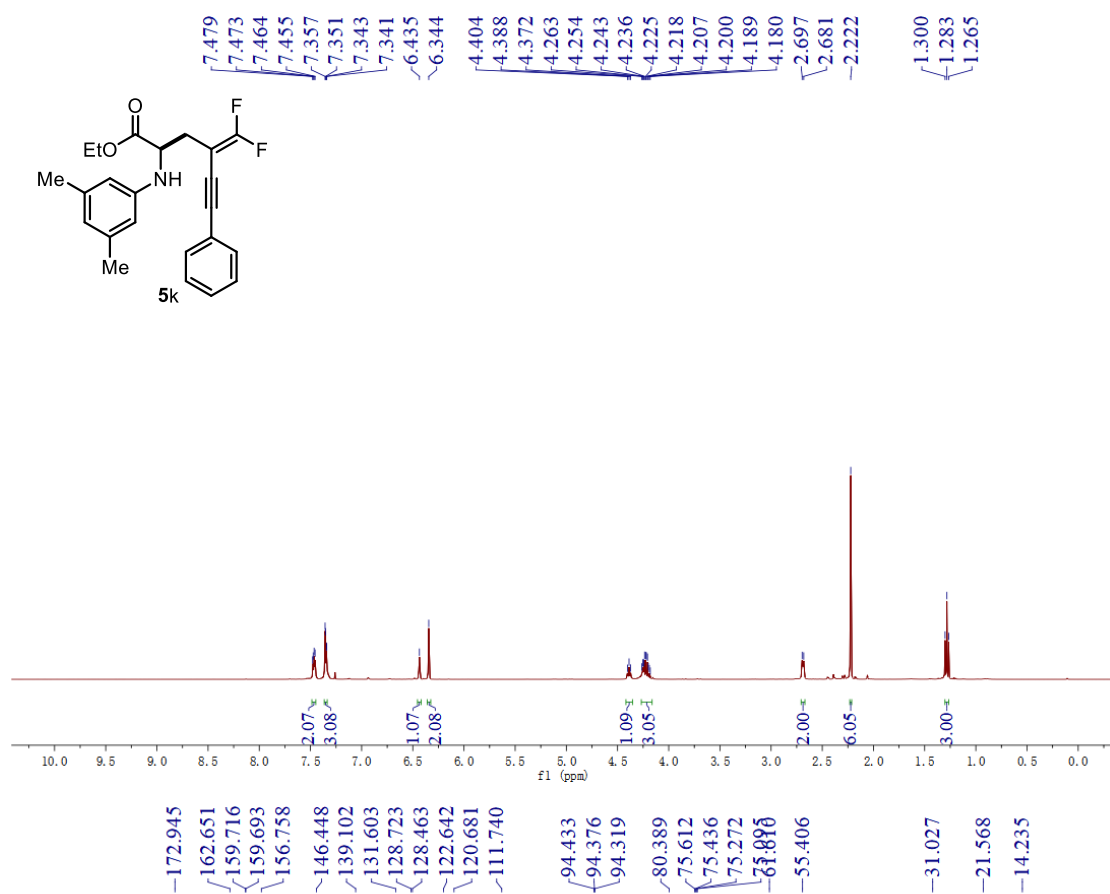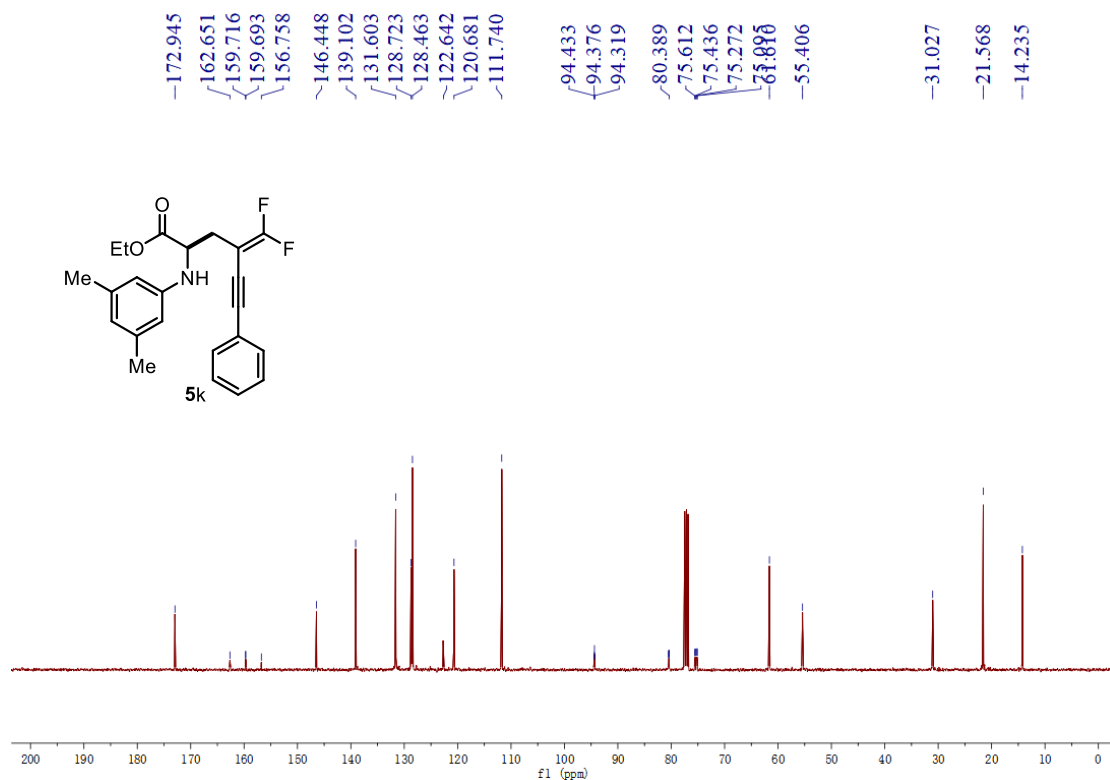



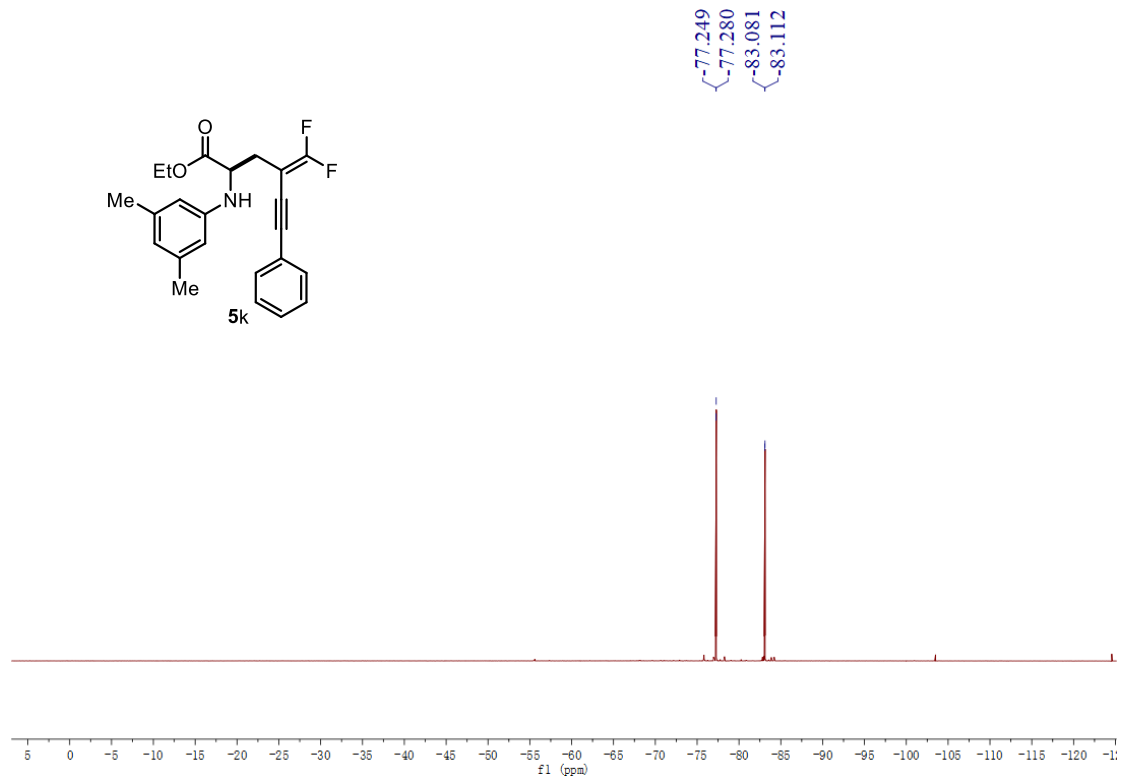

**<sup>1</sup>H, <sup>13</sup>C NMR and <sup>19</sup>F spectra for compound 5l (Chloroform-d)**

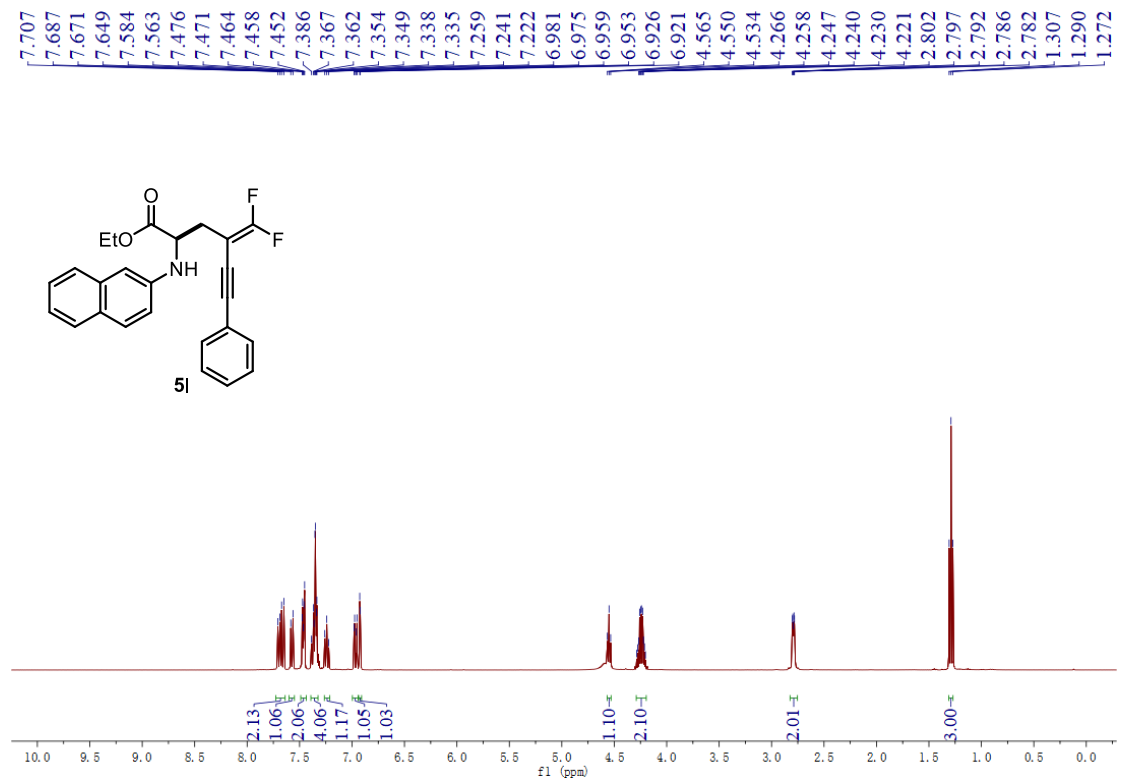

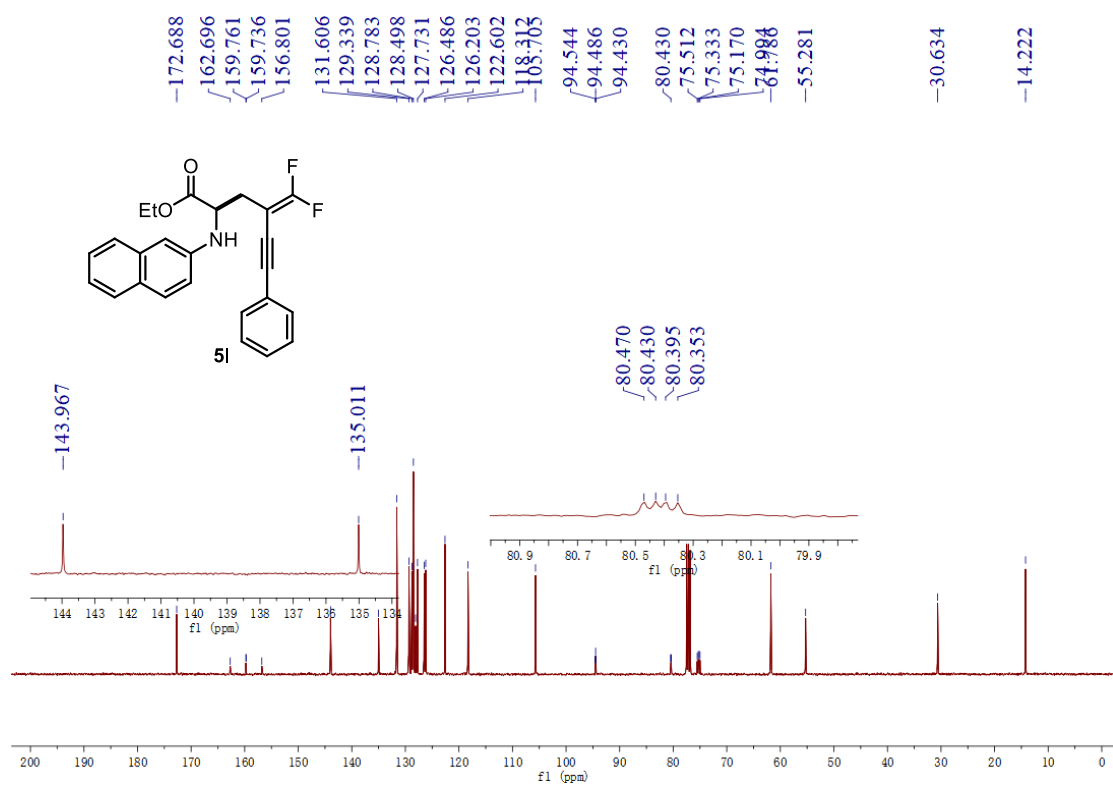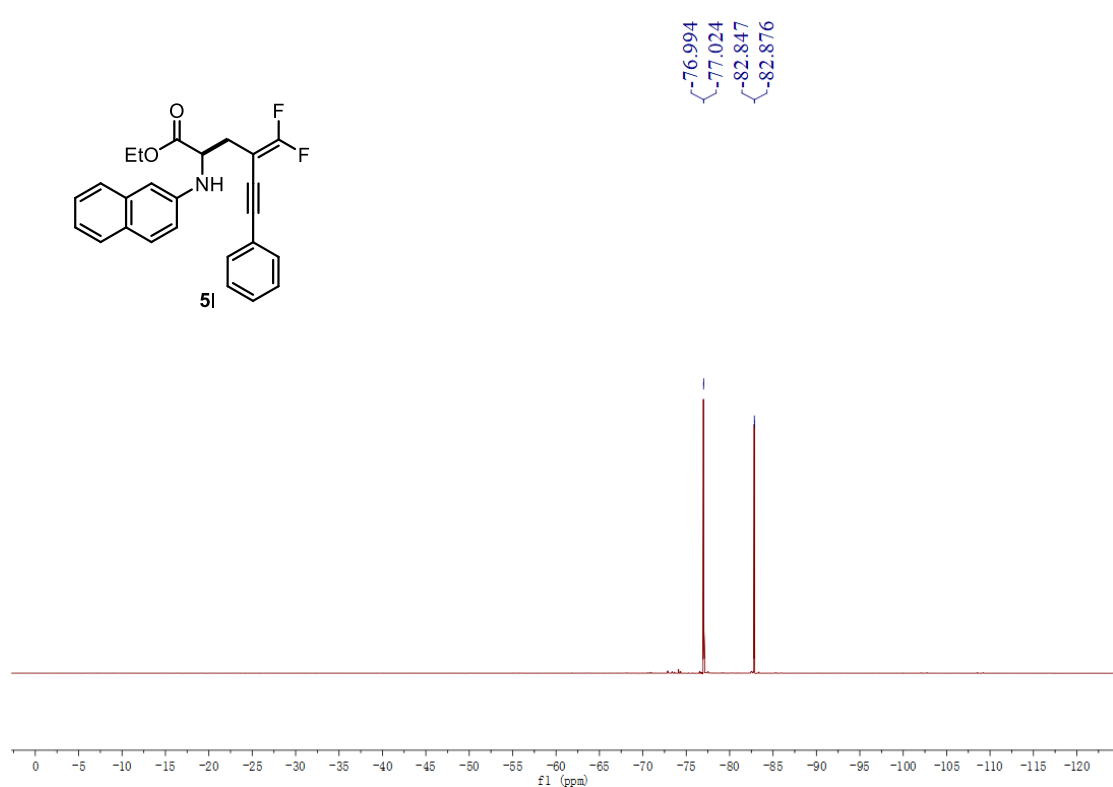

**<sup>1</sup>H, <sup>13</sup>C NMR and <sup>19</sup>F spectra for compound 5m (Chloroform-d)**

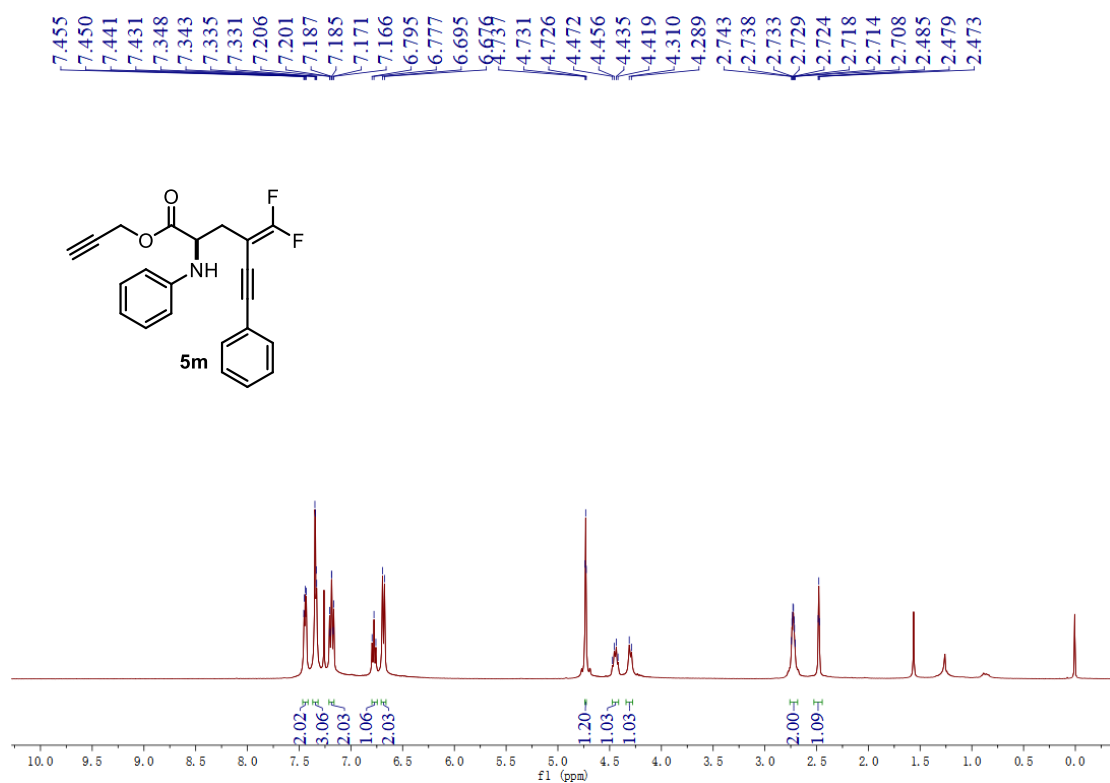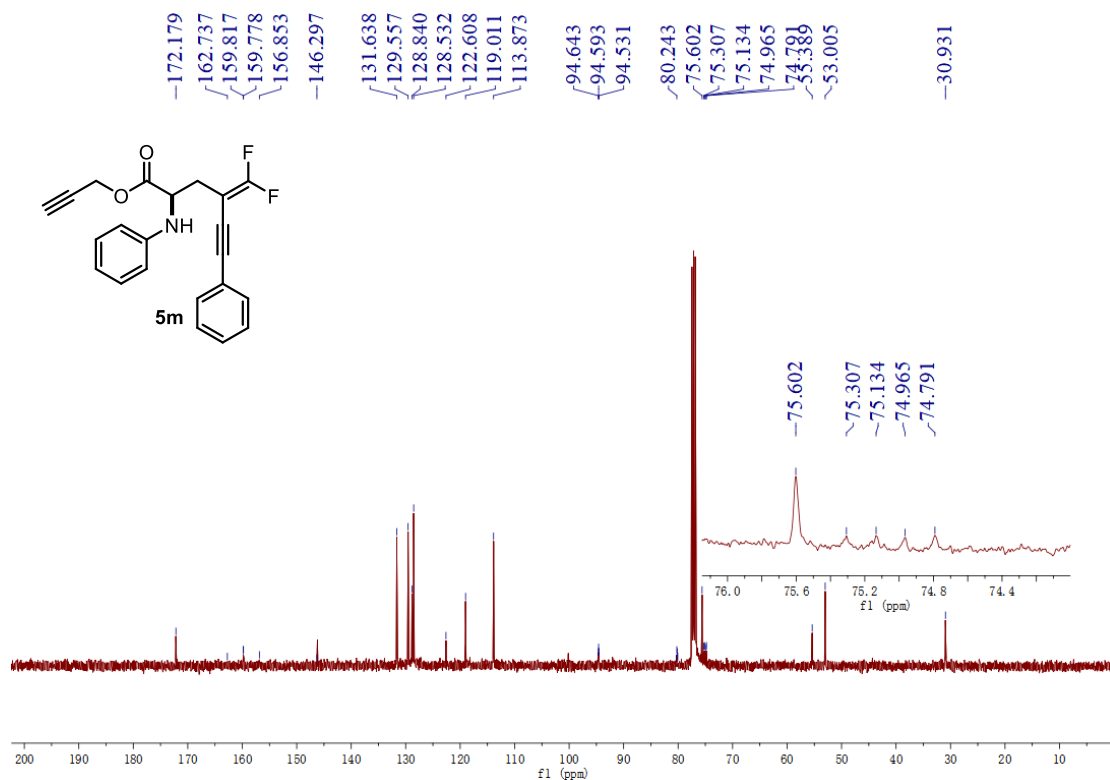

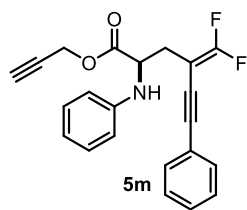

76.764  
76.792  
82.604  
82.632

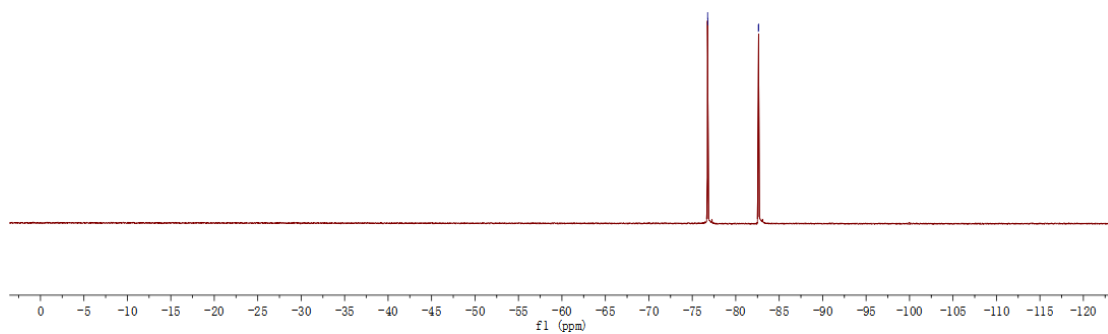

**<sup>1</sup>H, <sup>13</sup>C NMR and <sup>19</sup>F spectra for compound 5n (Chloroform-d)**

7.462  
7.456  
7.447  
7.438  
7.352  
7.346  
7.338  
7.335  
7.210  
7.191  
7.170  
6.788  
6.770  
6.752  
6.716  
6.697  
4.425  
4.413  
4.364  
4.005  
3.996  
3.984  
3.978  
3.966  
2.730  
2.724  
2.719  
2.714  
2.709  
2.704  
1.126  
1.107  
0.572  
0.564  
0.562  
0.558  
0.554  
0.544  
0.542  
0.271  
0.260  
0.256  
0.249  
0.238

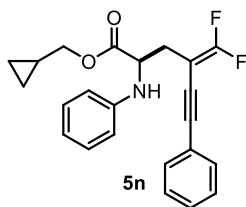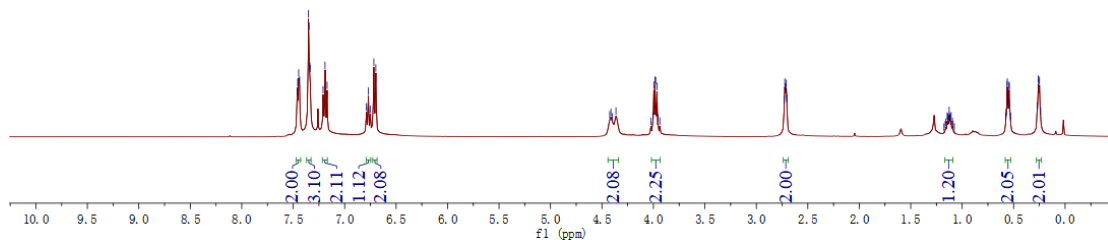

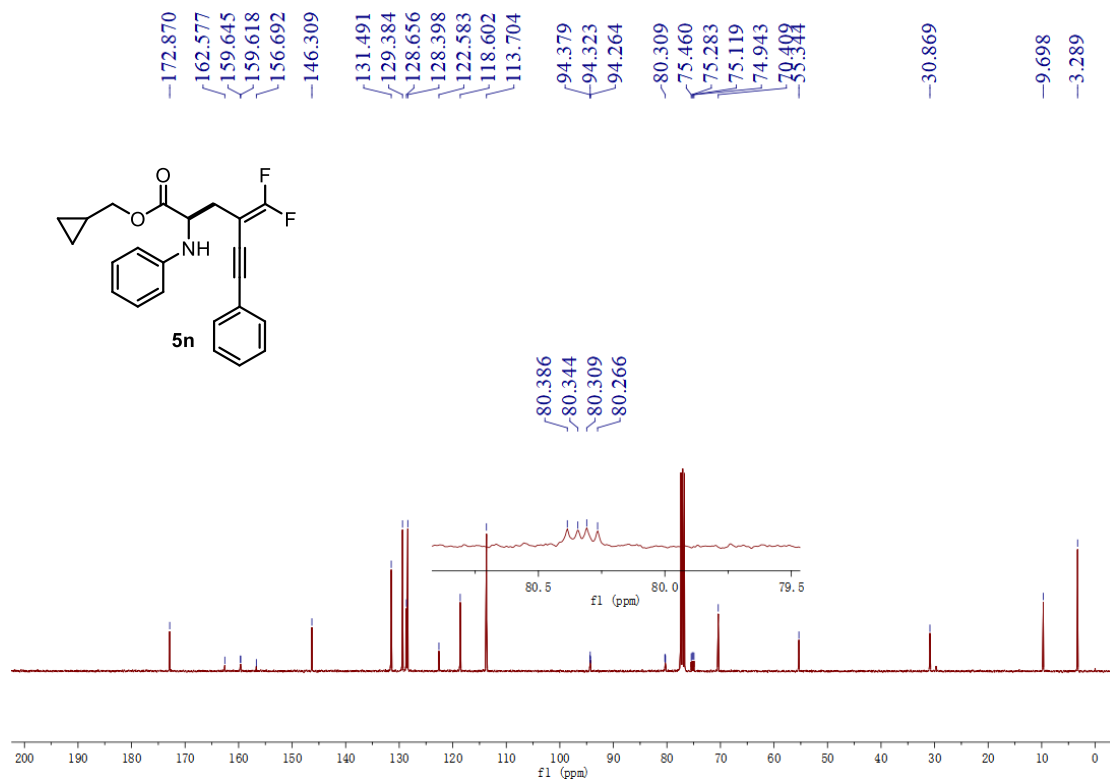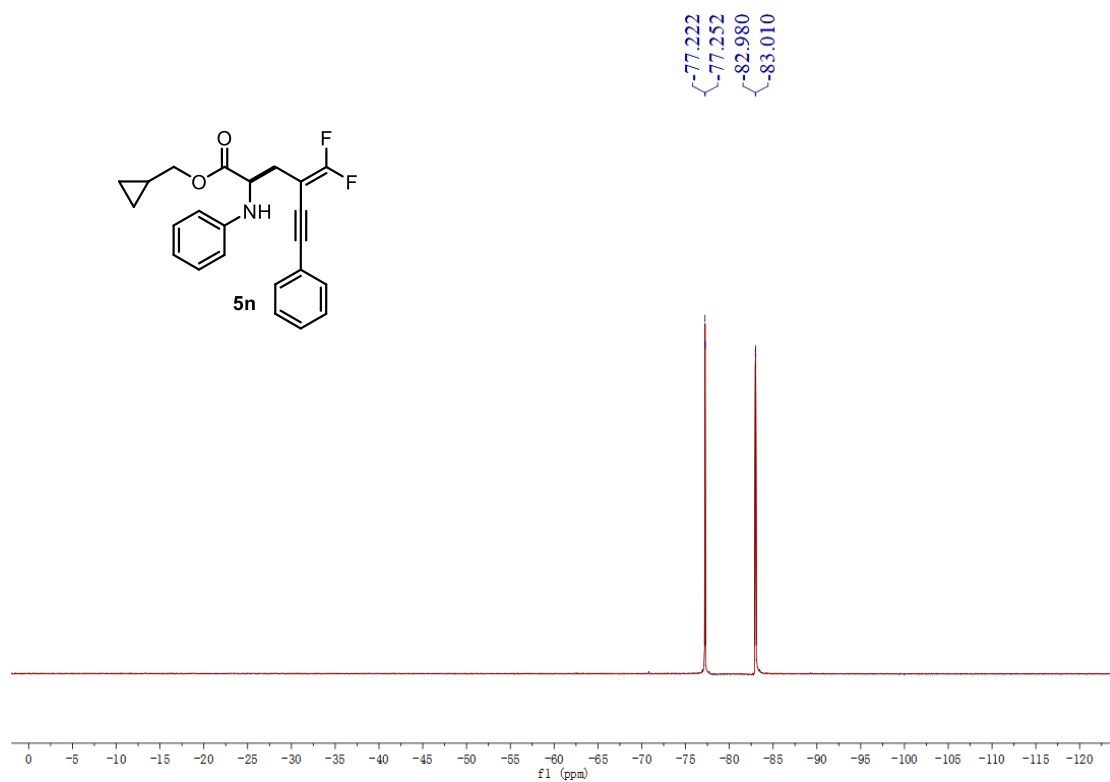

**<sup>1</sup>H, <sup>13</sup>C NMR and <sup>19</sup>F spectra for compound 5o (Chloroform-d)**

7.455  
7.450  
7.440  
7.431  
7.346  
7.341  
7.333  
7.330  
7.202  
7.182  
7.163  
6.782  
6.764  
6.746  
6.696  
6.675  
4.392  
4.377  
4.364  
4.320  
4.185  
4.164  
4.147  
2.706  
2.698  
2.692  
2.686  
2.678  
1.659  
1.654  
1.642  
1.528  
1.511  
1.494  
1.477  
1.292  
1.273  
1.265  
1.195  
1.164  
1.145  
0.904  
0.876  
0.846

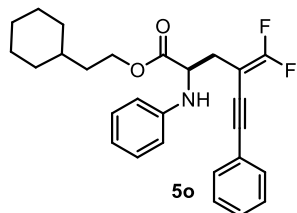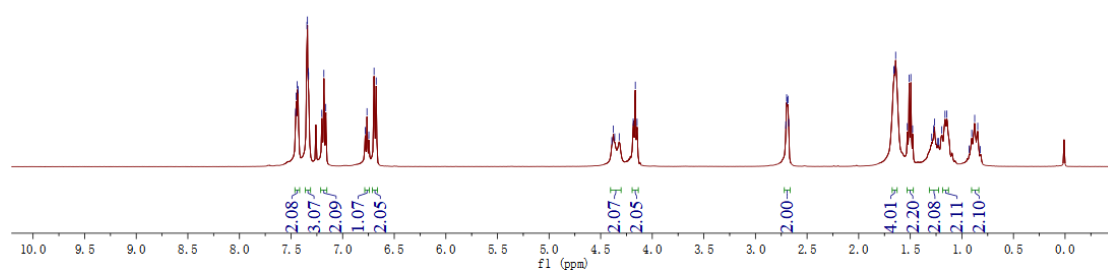

172.967  
162.669  
159.736  
159.710  
156.777  
146.434  
131.606  
129.503  
128.766  
128.501  
122.693  
118.741  
113.775  
94.523  
94.467  
94.408  
75.558  
75.381  
75.217  
63.949  
55.451  
35.952  
34.487  
33.185  
30.979  
26.553  
26.239

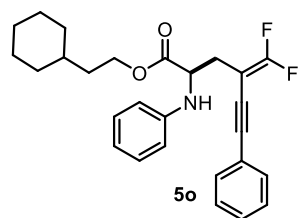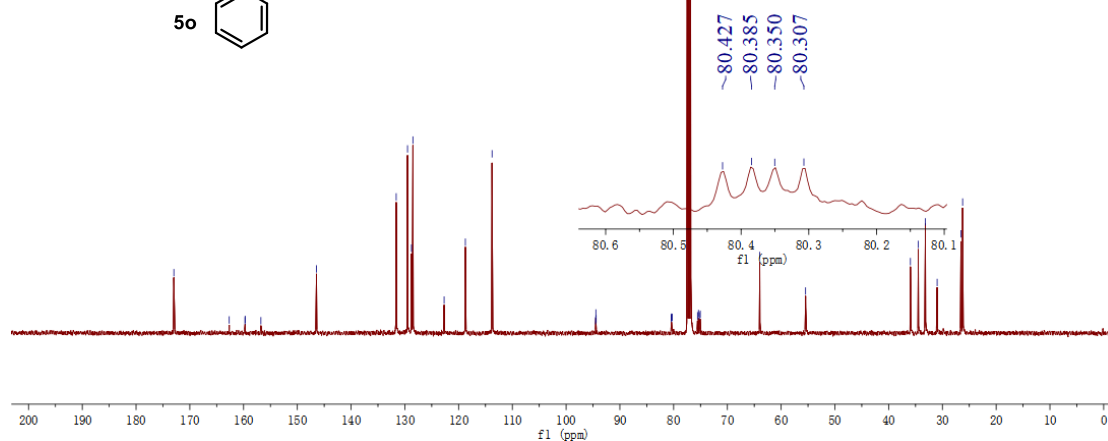

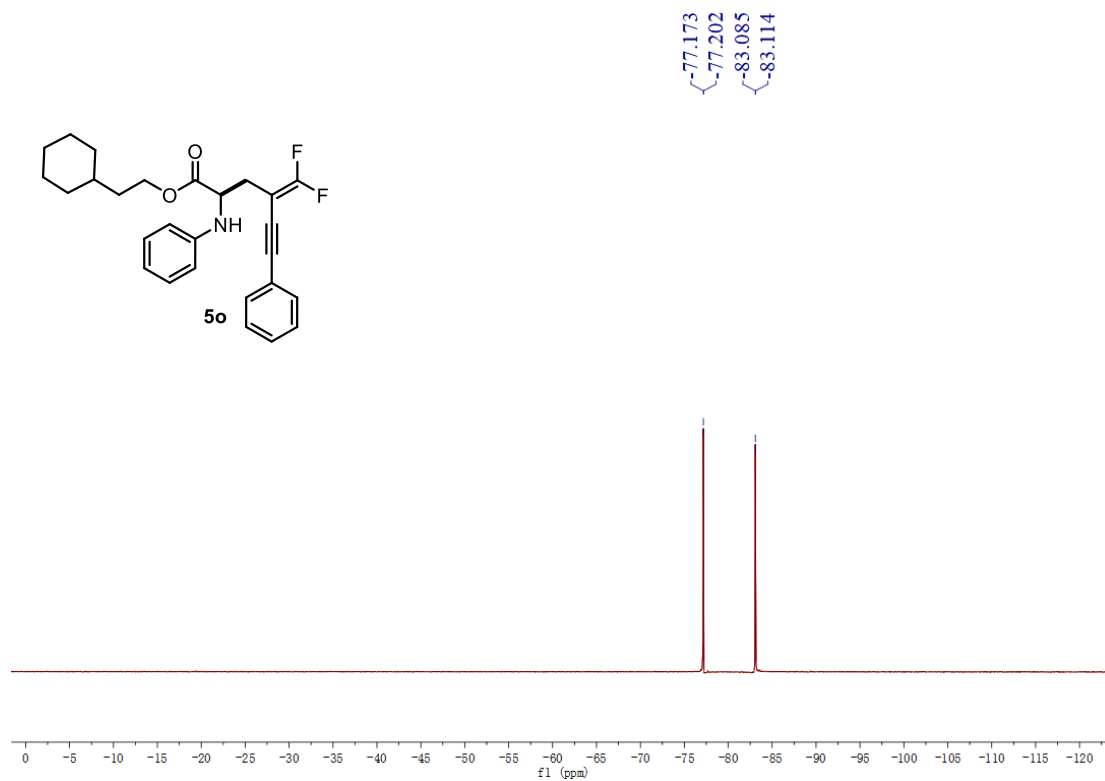

**$^1\text{H}$ ,  $^{13}\text{C}$  NMR and  $^{19}\text{F}$  spectra for compound 5p (Chloroform-d)**

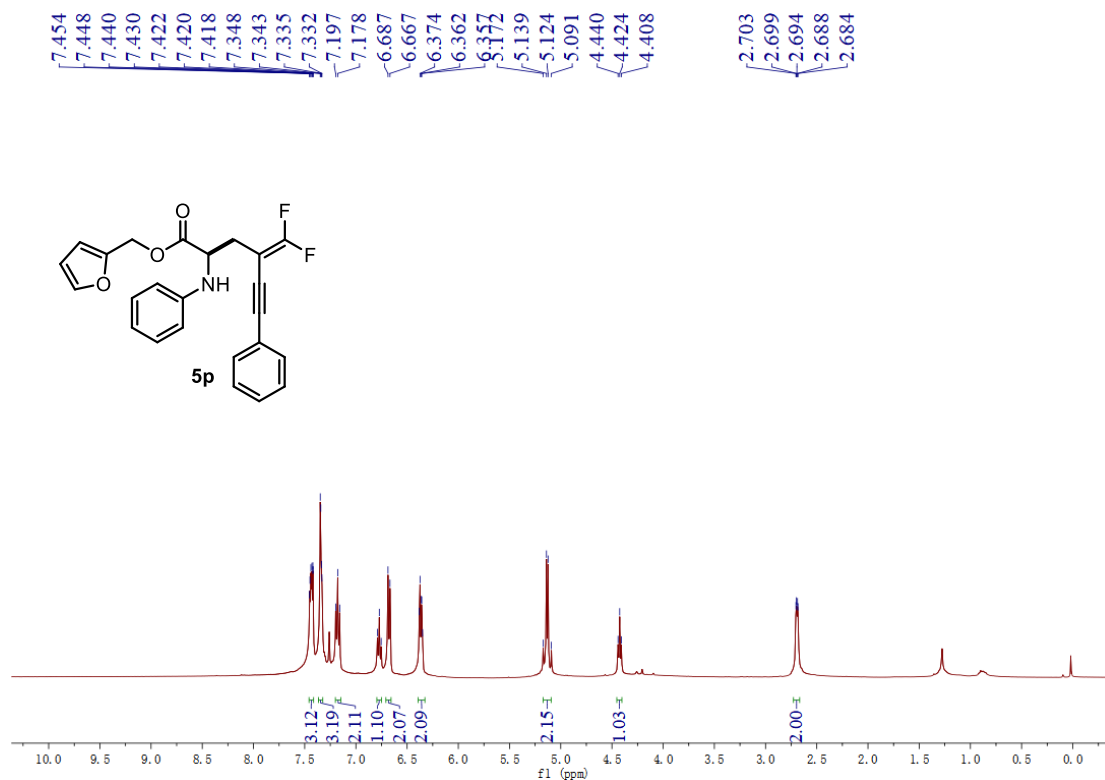

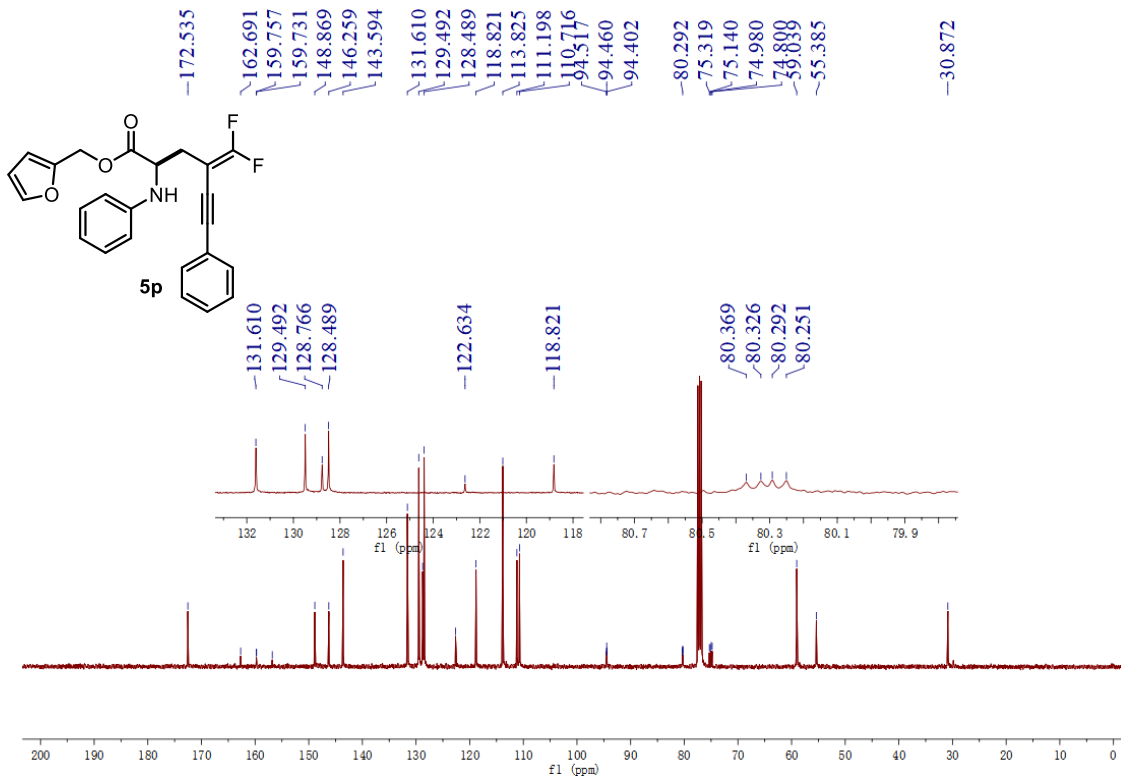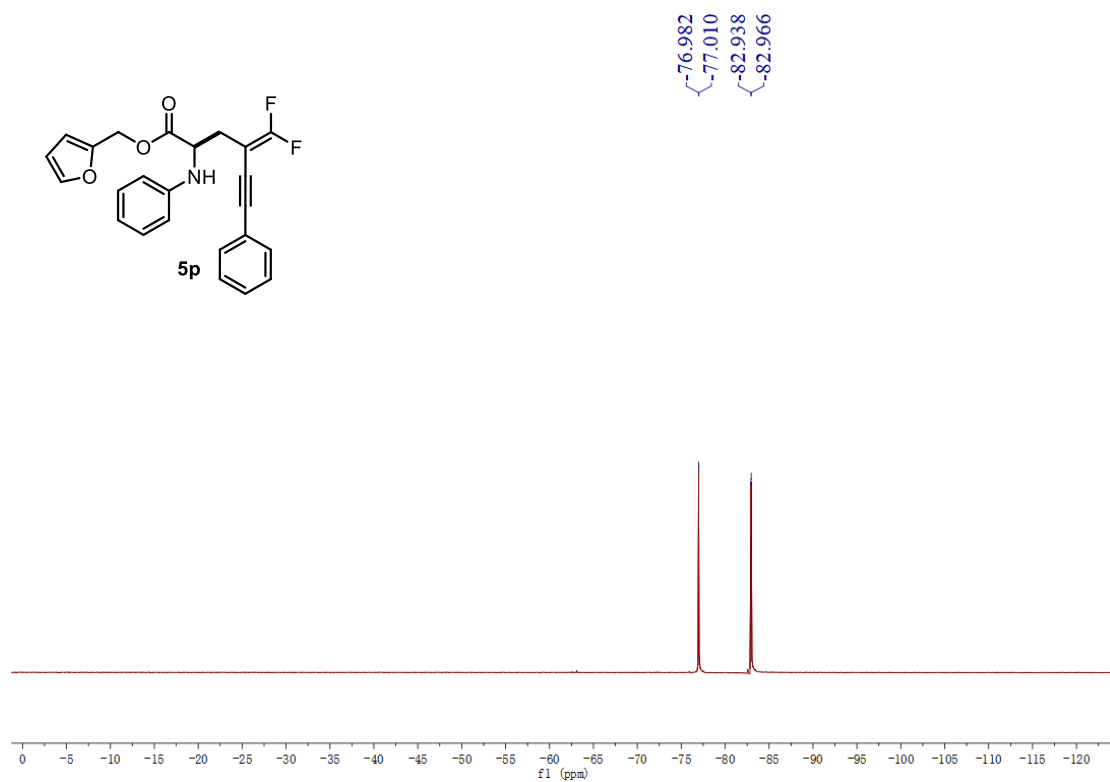



**<sup>1</sup>H, <sup>13</sup>C NMR and <sup>19</sup>F spectra for compound 5q (Chloroform-d)**

7.470  
7.464  
7.455  
7.446  
7.356  
7.350  
7.344  
7.342  
7.207  
7.188  
7.167  
6.785  
6.767  
6.748  
6.709  
6.689  
4.999  
4.989  
4.978  
4.376  
4.360  
4.344  
2.694  
2.679  
1.890  
1.878  
1.867  
1.858  
1.683  
1.672  
1.654  
1.630  
1.622  
1.602  
1.596  
1.545  
1.539  
1.532  
1.443  
1.439  
1.421  
1.411  
1.396  
1.386

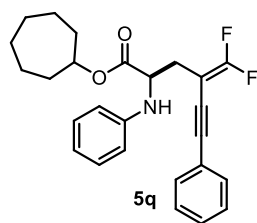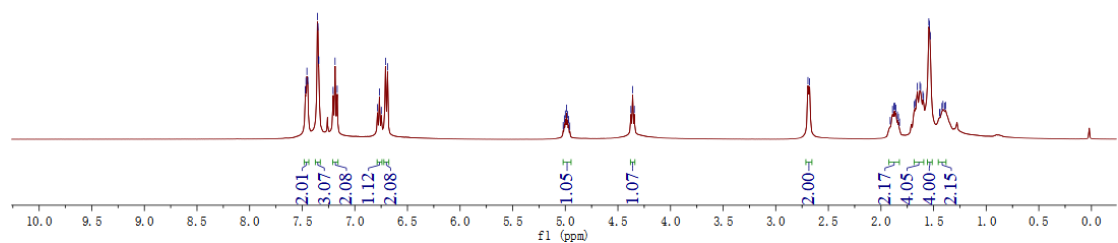

172.097  
162.492  
159.561  
159.536  
156.604  
146.416  
131.507  
129.362  
128.649  
128.391  
122.617  
118.557  
113.700  
94.417  
94.360  
94.303  
80.303  
76.697  
75.568  
75.391  
75.227  
55.959  
55.459  
33.744  
33.612  
30.795  
28.218  
28.184  
22.728  
22.698

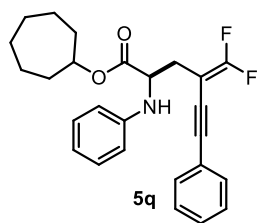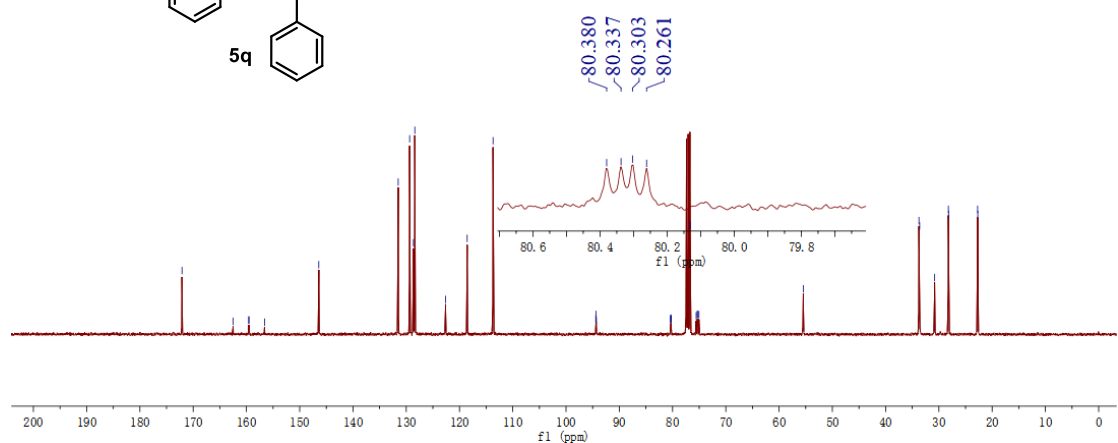

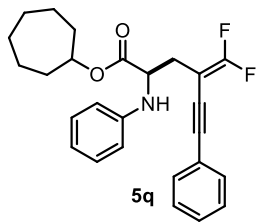

-77.394  
-77.424  
-82.983  
-83.013

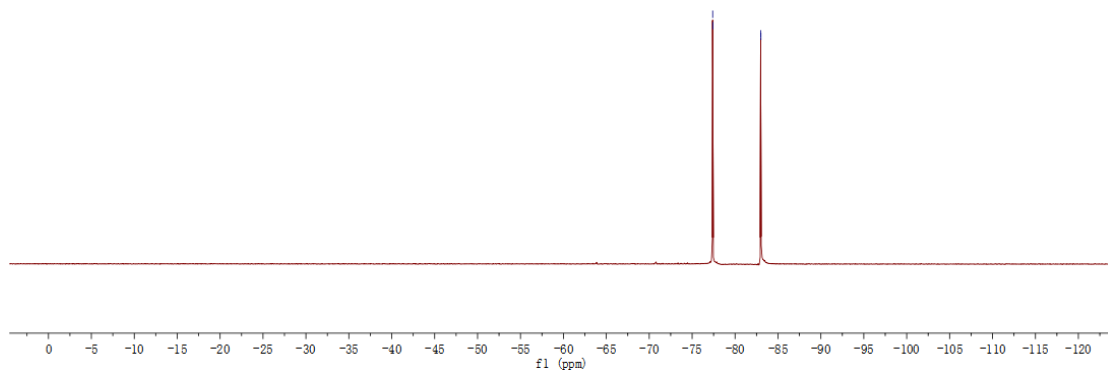

**<sup>1</sup>H, <sup>13</sup>C NMR and <sup>19</sup>F spectra for compound 5r (Chloroform-d)**

7.346  
7.329  
7.313  
7.209  
7.189  
7.169  
6.837  
6.819  
6.800  
6.755  
6.734  
6.642  
6.623  
4.005  
3.994  
3.983  
3.972  
3.786  
3.775  
3.764  
2.891  
2.864  
2.859  
2.855  
2.661  
2.639  
2.627  
1.837  
1.813  
1.808  
1.626  
1.588  
1.553  
1.545  
1.353  
1.328  
1.296  
1.105  
1.075  
1.050  
0.874  
0.856  
0.846  
0.836

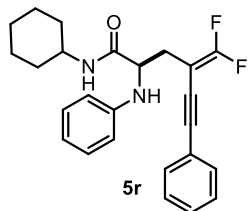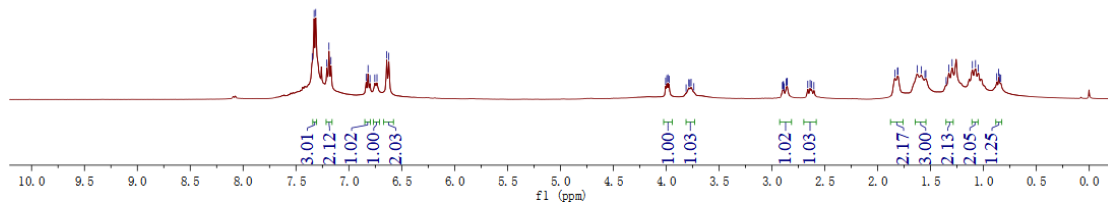

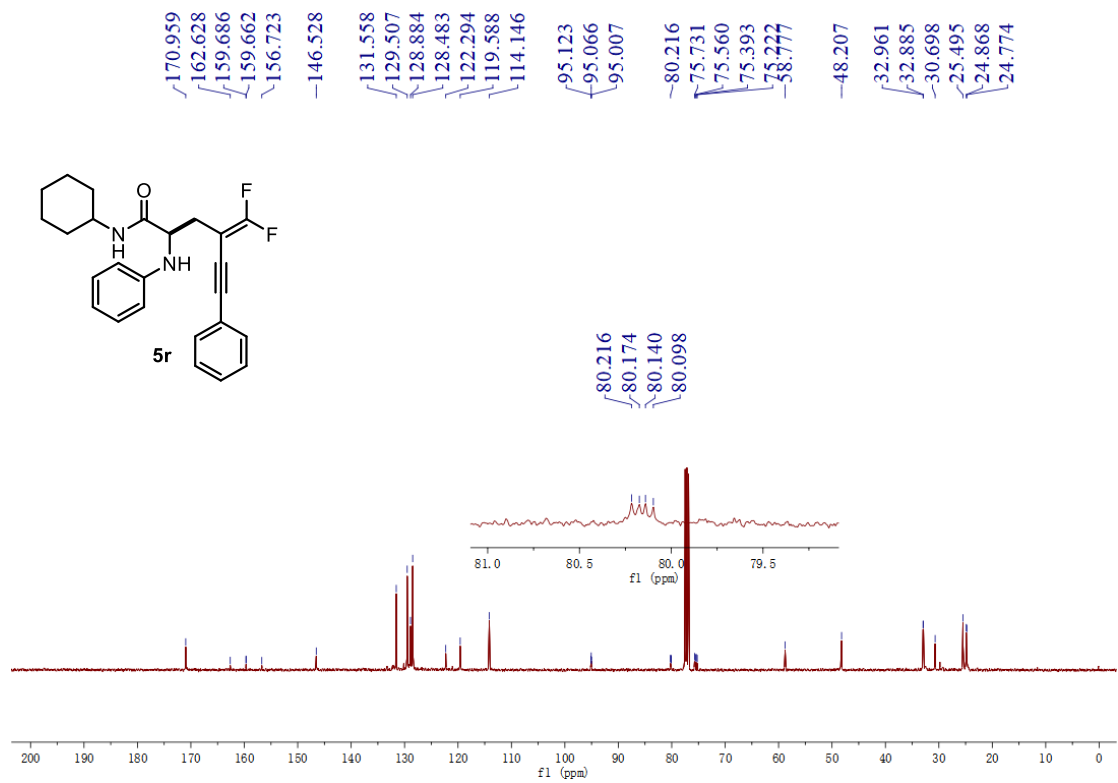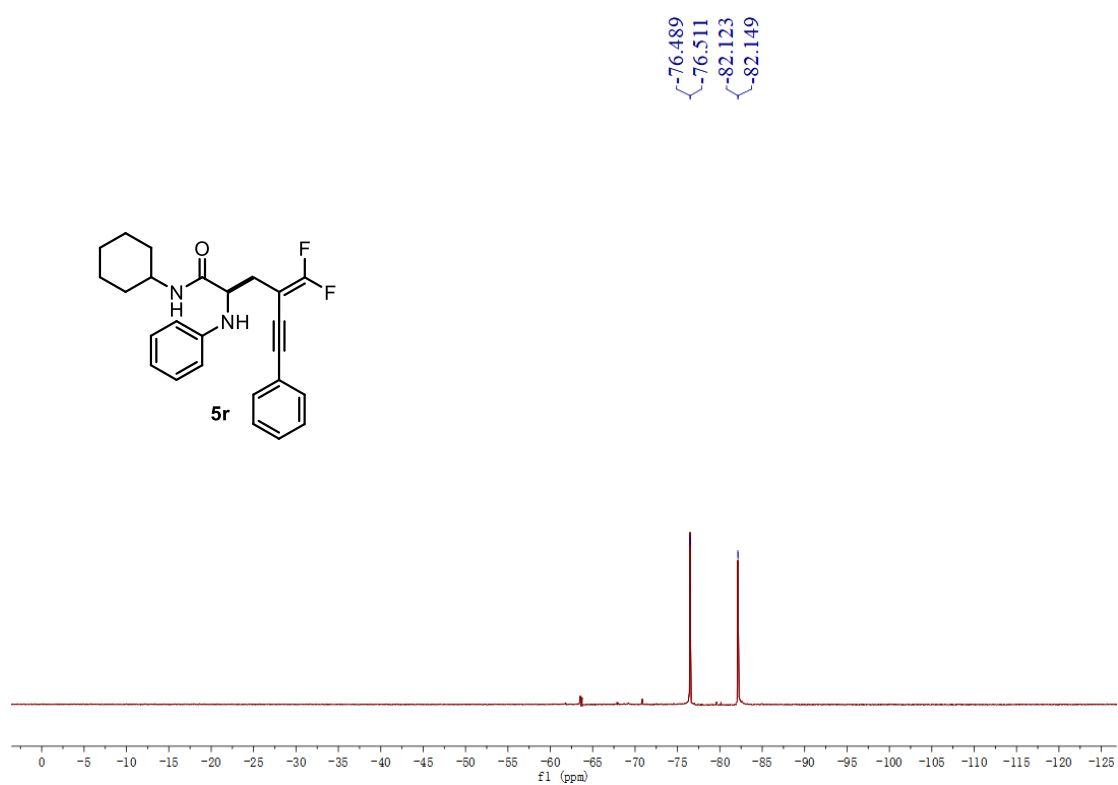



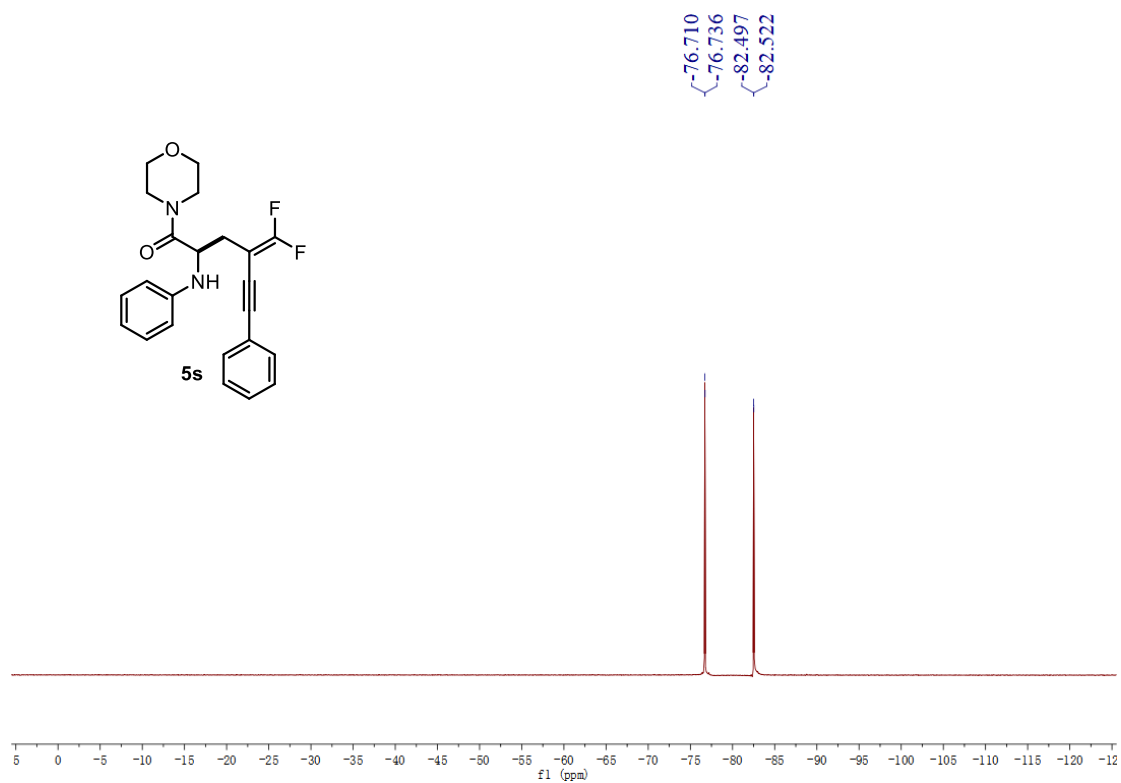

**$^1\text{H}$ ,  $^{13}\text{C}$  NMR and  $^{19}\text{F}$  spectra for compound **5t** (Chloroform-d)**

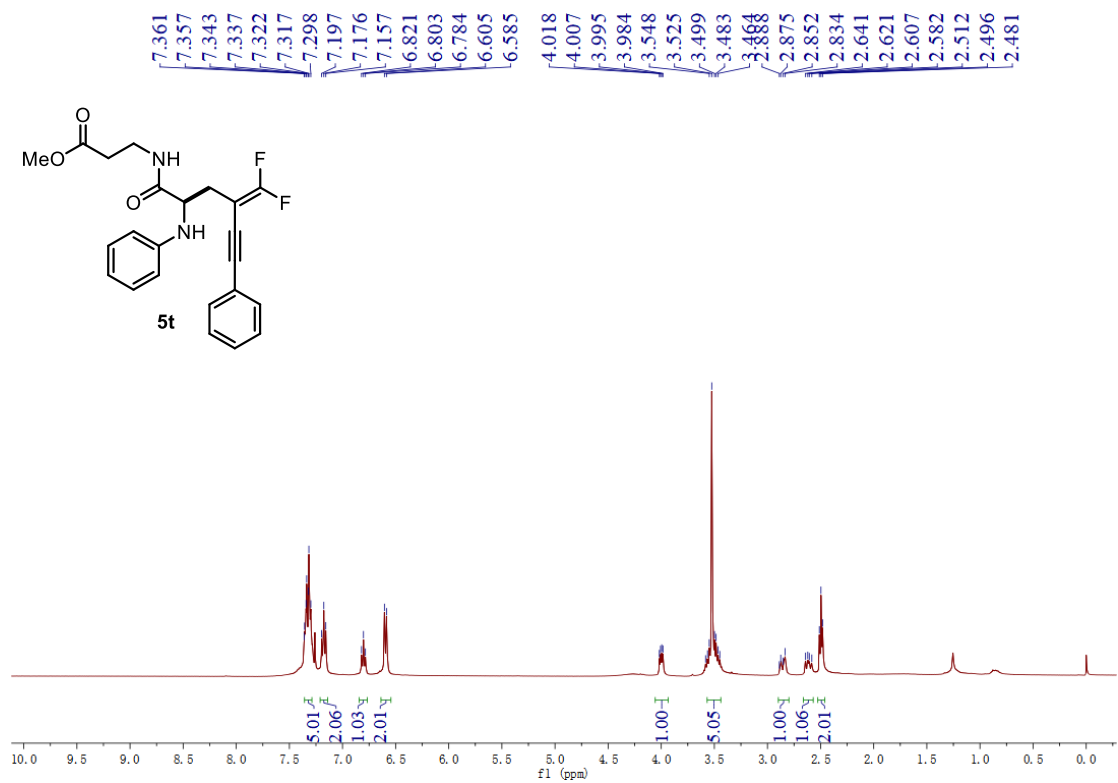

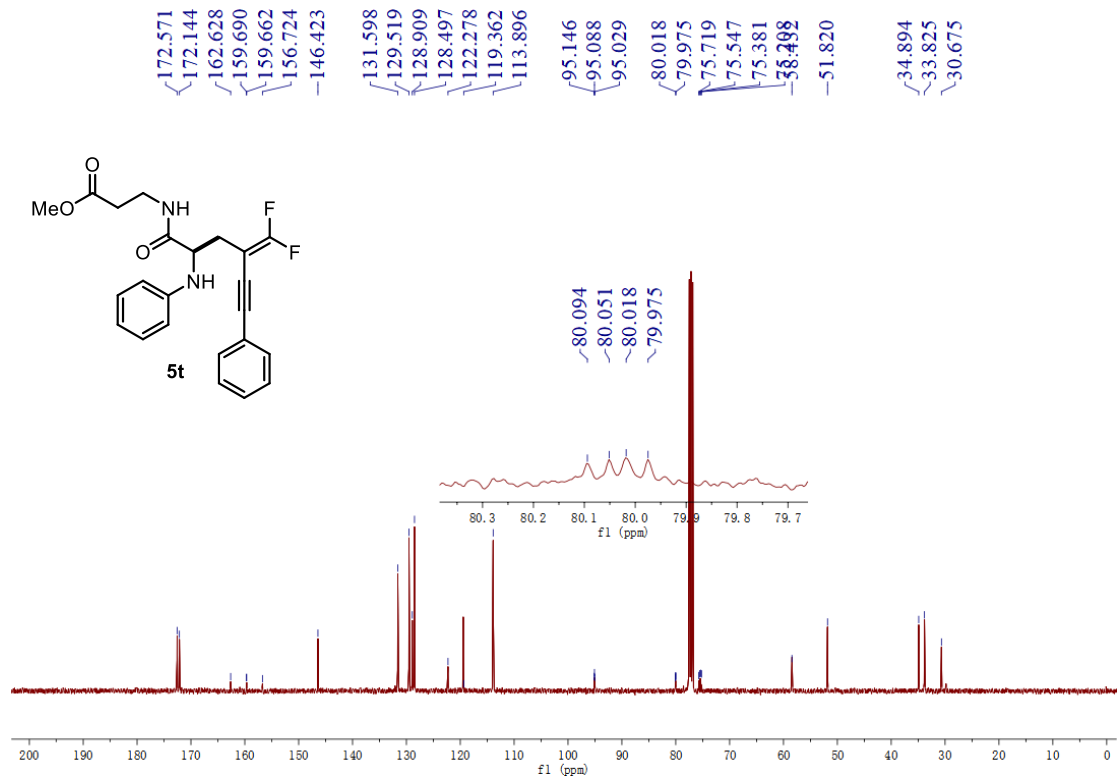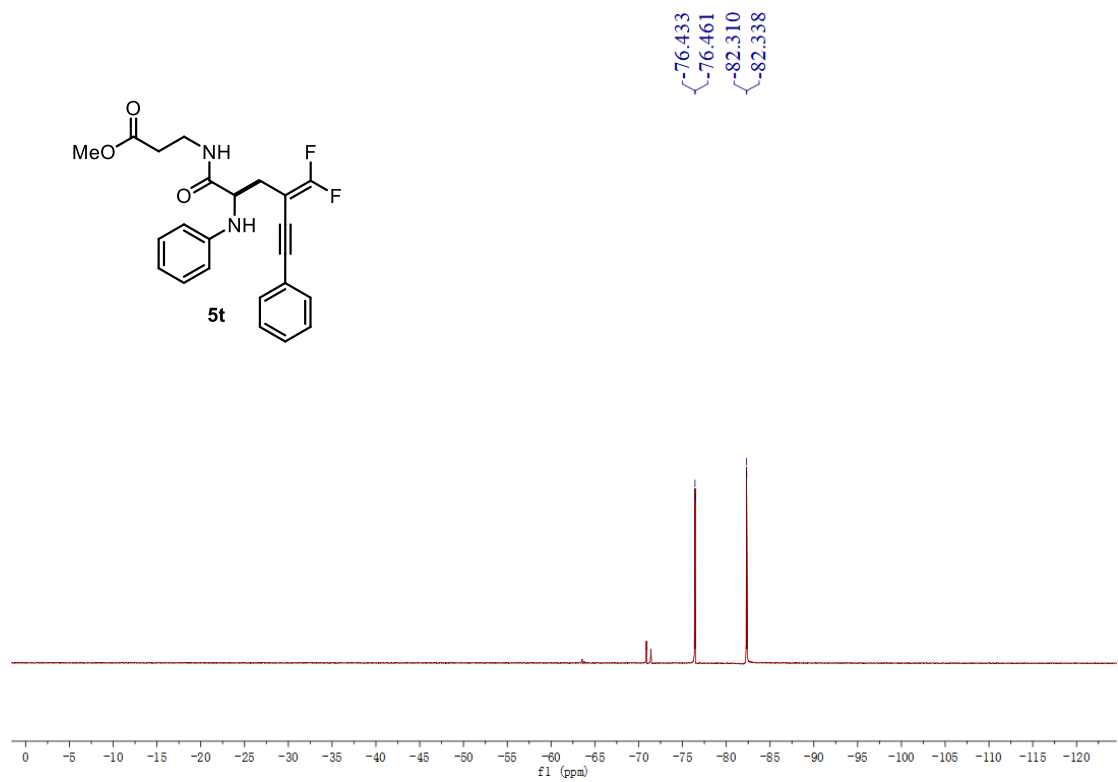

**<sup>1</sup>H, <sup>13</sup>C NMR and <sup>19</sup>F spectra for compound 5u (Chloroform-d)**

7.523  
7.502  
7.434  
7.414  
7.343  
7.337  
7.325  
7.318  
7.312  
7.302  
7.210  
7.190  
7.170  
6.832  
6.813  
6.795  
6.683  
6.663  
6.645  
6.625  
4.754  
4.742  
4.099  
4.088  
4.079  
4.075  
4.064  
3.689  
3.648  
2.875  
2.685  
2.444  
2.440  
2.436  
2.424  
2.418  
2.329  
2.323  
2.309  
2.303  
2.288  
2.117  
2.012  
1.916

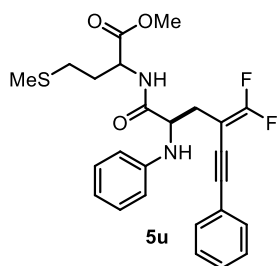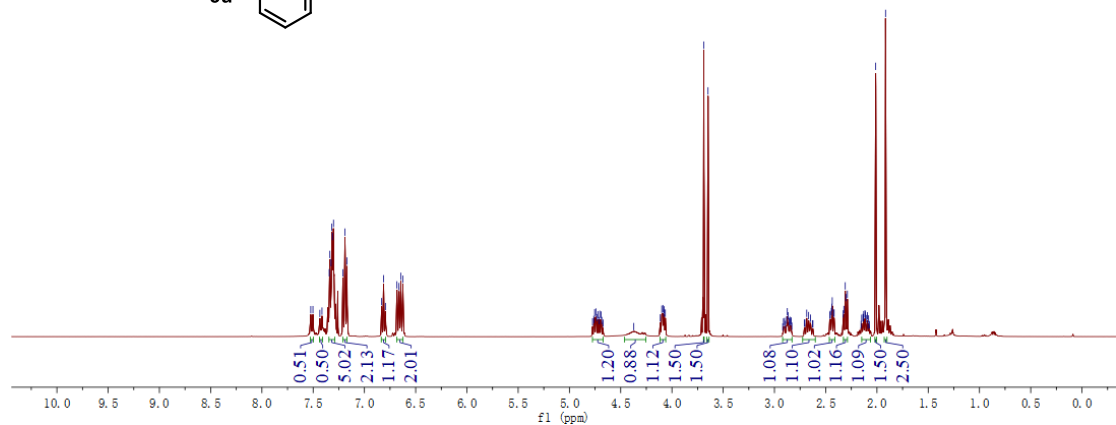

172.189  
172.042  
172.020  
171.680  
146.308  
146.285  
131.452  
129.441  
129.351  
128.807  
128.771  
128.395  
128.359  
122.128  
119.526  
114.223  
113.785  
95.007  
75.573  
75.561  
75.397  
75.387  
75.234  
75.224  
75.061  
75.048  
58.407  
58.385  
58.366  
58.292  
58.270  
58.247  
52.509  
52.419  
51.561  
51.158  
31.234  
31.205  
30.500  
30.360  
29.986  
29.726  
15.385  
15.210

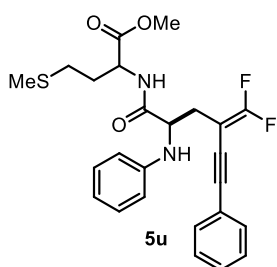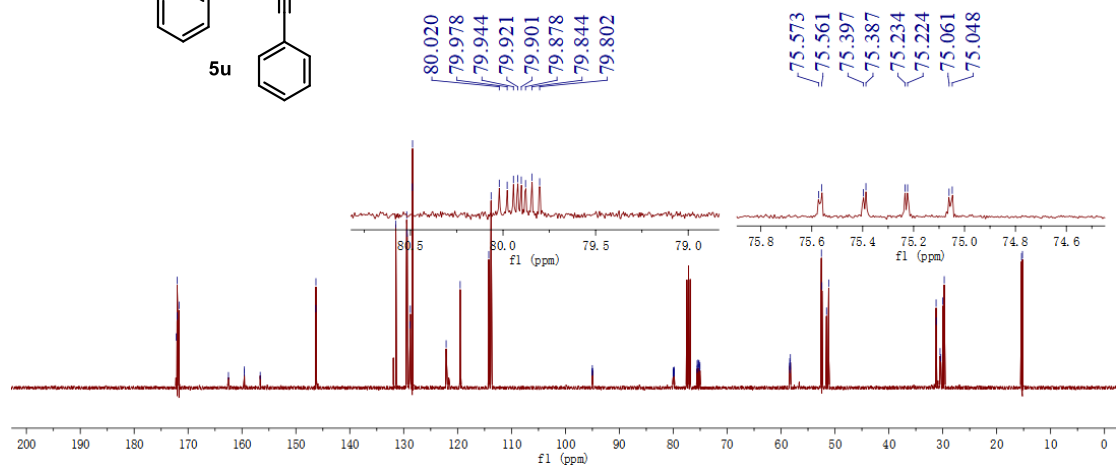

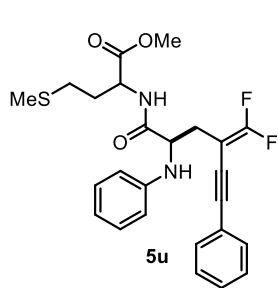

<sup>13</sup>C NMR peaks (ppm):  
 -76.501  
 -76.527  
 -76.553  
 -76.578  
 -82.243  
 -82.268  
 -82.313  
 -82.338

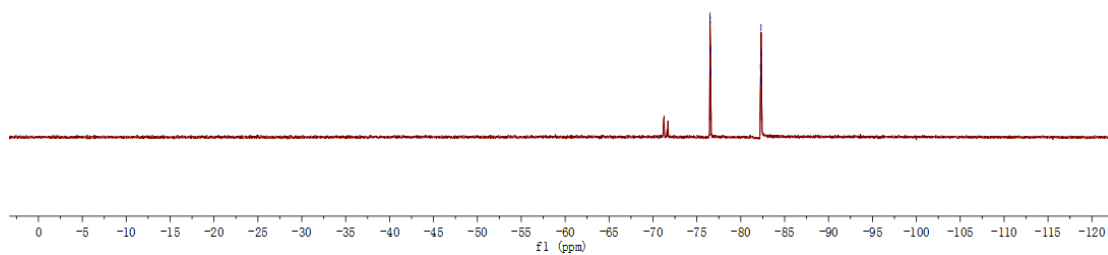

**<sup>1</sup>H, <sup>13</sup>C NMR and <sup>19</sup>F spectra for compound 5v (Chloroform-d)**

<sup>13</sup>C NMR peaks (ppm):  
 7.299, 7.213, 7.193, 7.174, 7.135, 7.117, 7.084, 7.065, 7.047, 6.864, 6.850, 6.847, 6.833, 6.569, 6.549, 4.928, 4.921, 4.913, 4.906, 4.158, 4.140, 4.122, 4.104, 4.020, 4.010, 3.995, 3.986, 3.071, 3.037, 2.997, 2.963, 2.892, 2.884, 2.862, 2.855, 2.847, 2.600, 2.574, 2.571, 2.564, 2.539, 1.245, 1.227, 1.209

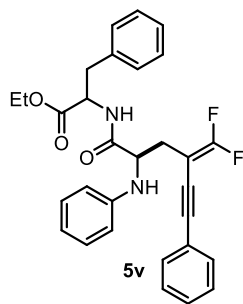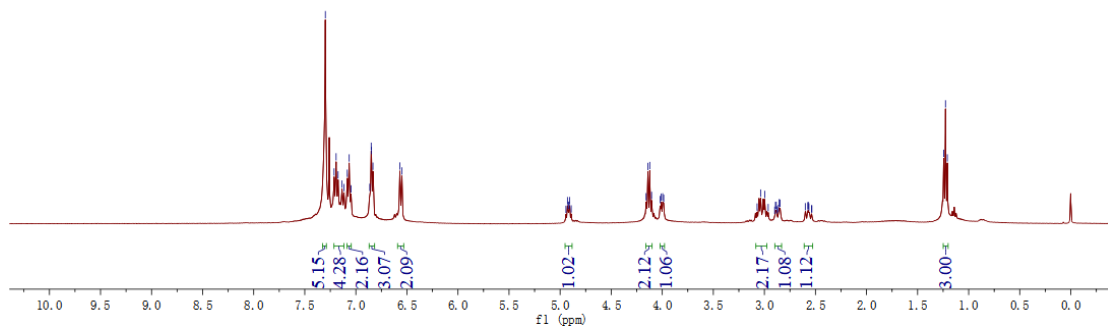



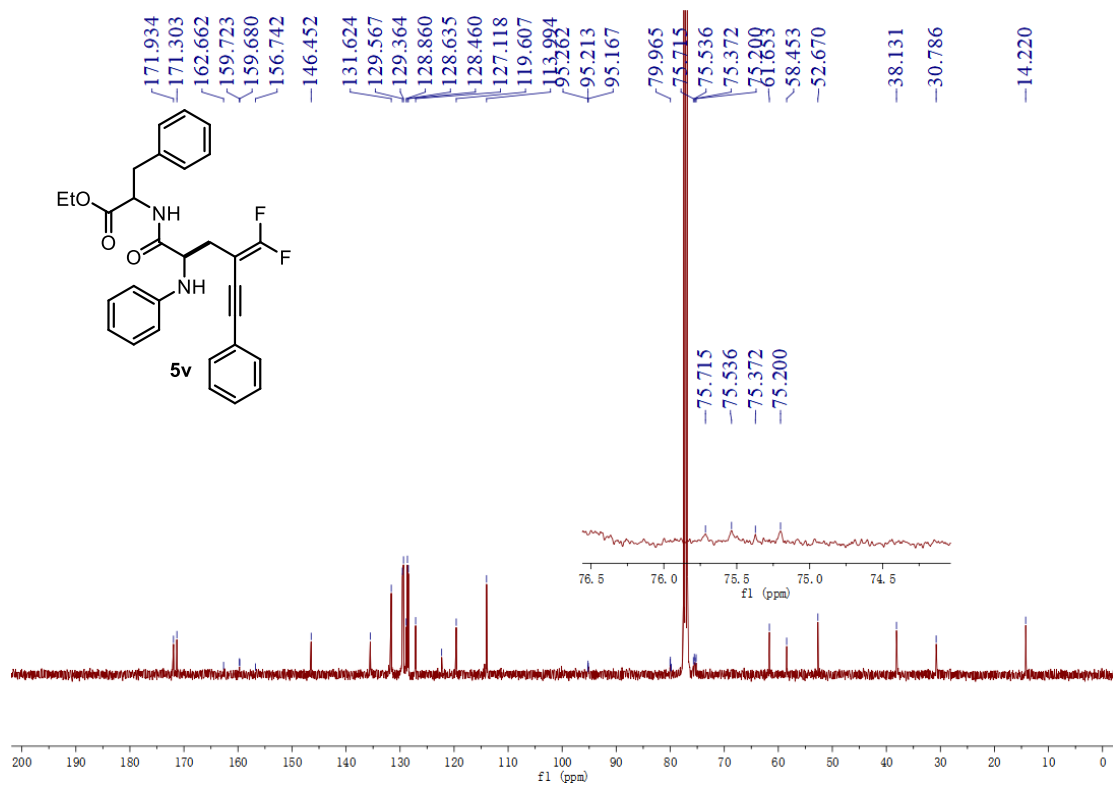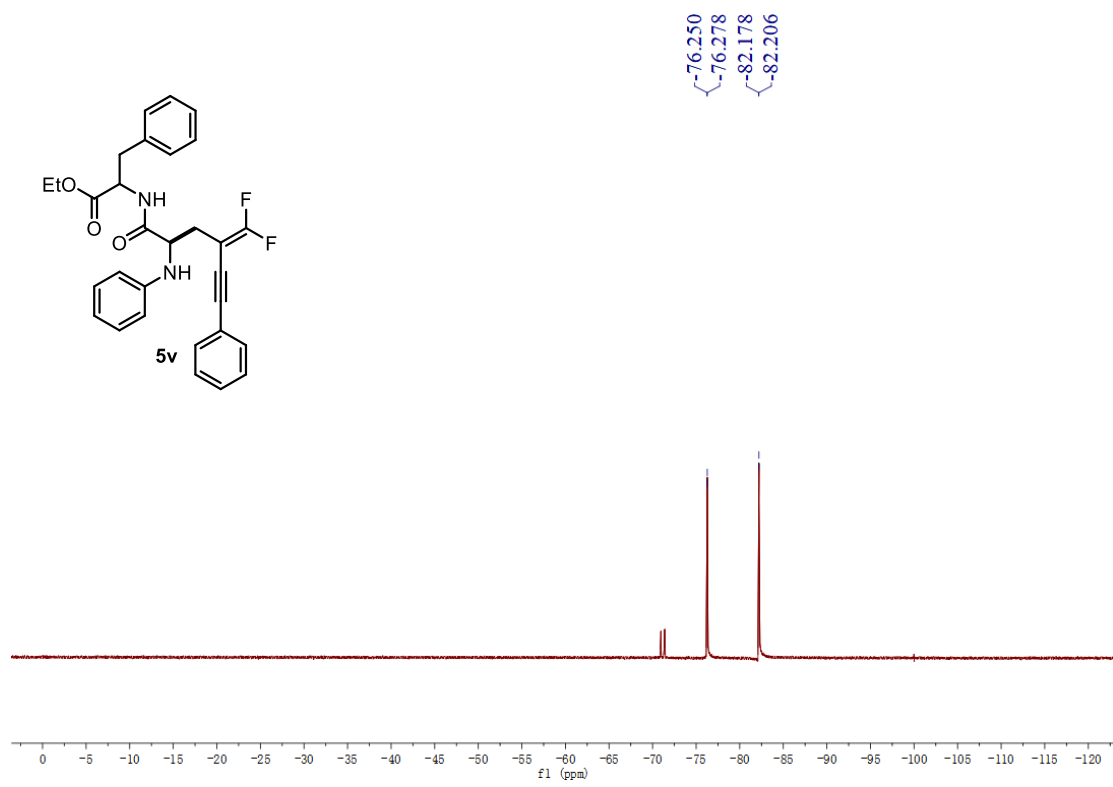

**$^1\text{H}$ ,  $^{13}\text{C}$  NMR and  $^{19}\text{F}$  spectra for compound 5w (Chloroform-d)**

7.341  
7.338  
7.331  
7.323  
7.316  
7.225  
7.211  
7.206  
7.190  
7.184  
7.171  
6.834  
6.820  
6.698  
6.678  
6.651  
6.631  
4.657  
4.645  
4.634  
4.622  
4.090  
4.079  
4.067  
4.057  
3.692  
3.646  
2.885  
1.630  
1.617  
1.599  
1.577  
1.563  
1.487  
1.463  
1.453  
1.437  
1.431  
-0.912  
-0.897  
-0.885  
-0.869  
-0.822  
-0.806

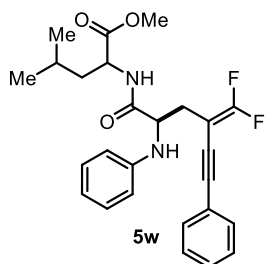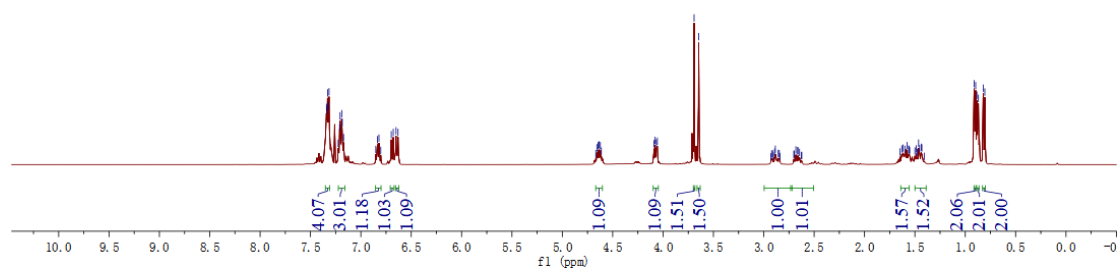

173.224  
172.764  
172.110  
172.027  
159.667  
146.468  
146.371  
132.059  
131.993  
131.547  
129.441  
128.895  
128.842  
128.481  
128.443  
122.240  
119.728  
119.606  
114.448  
114.015  
95.117  
95.062  
80.076  
80.035  
75.664  
75.486  
75.323  
75.149  
75.082  
58.812  
58.499  
52.391  
52.277  
50.791  
50.521  
41.324  
41.134  
30.619  
30.483  
24.950  
24.785  
22.865  
21.739  
21.586

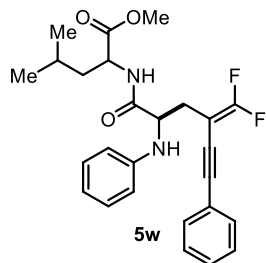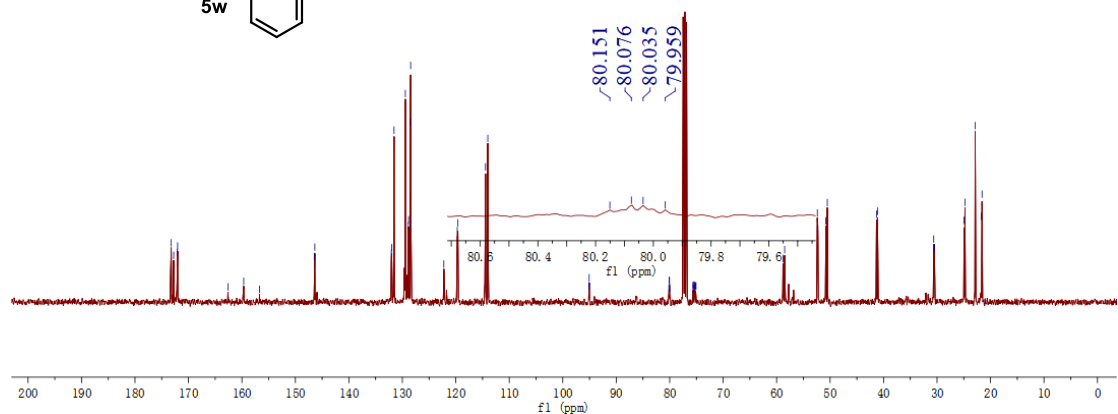

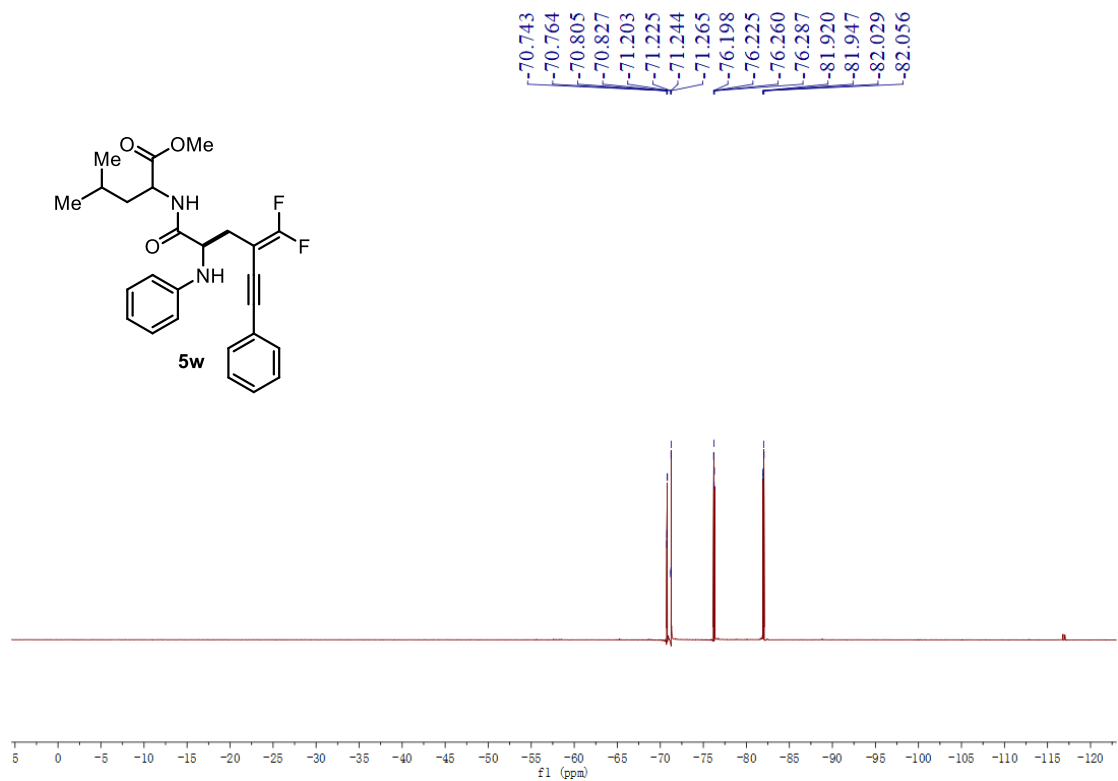

**<sup>1</sup>H, <sup>13</sup>C NMR and <sup>19</sup>F spectra for compound 6a (Chloroform-d)**

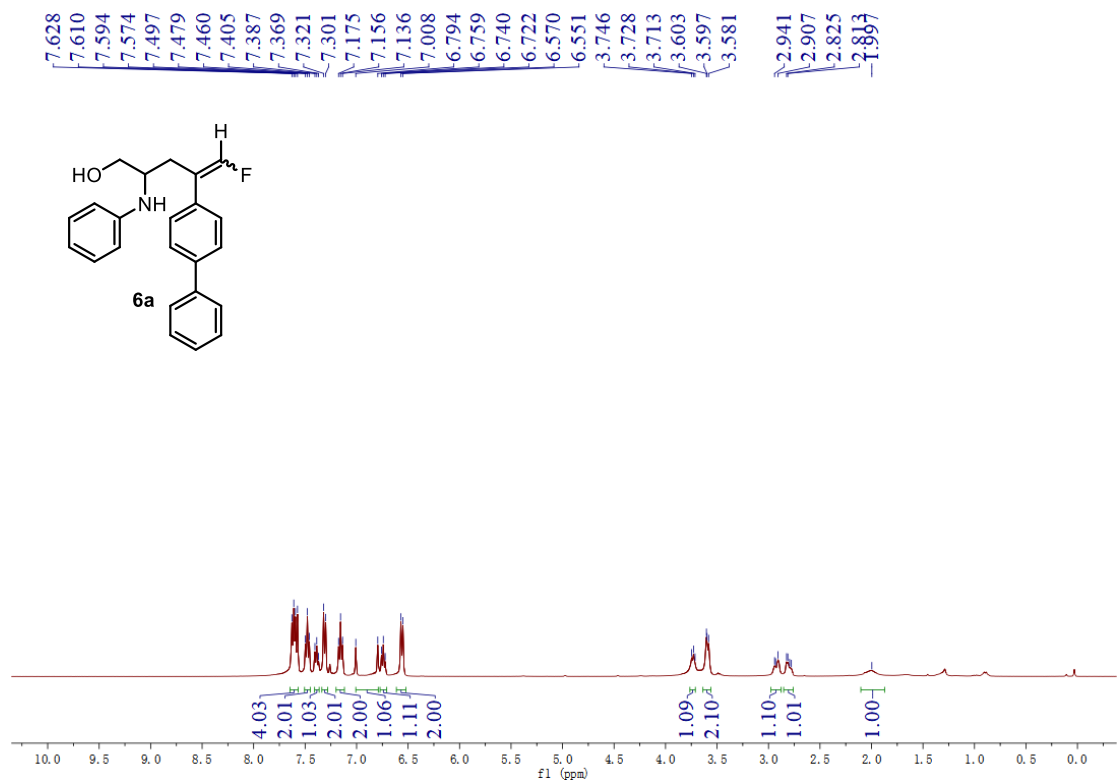

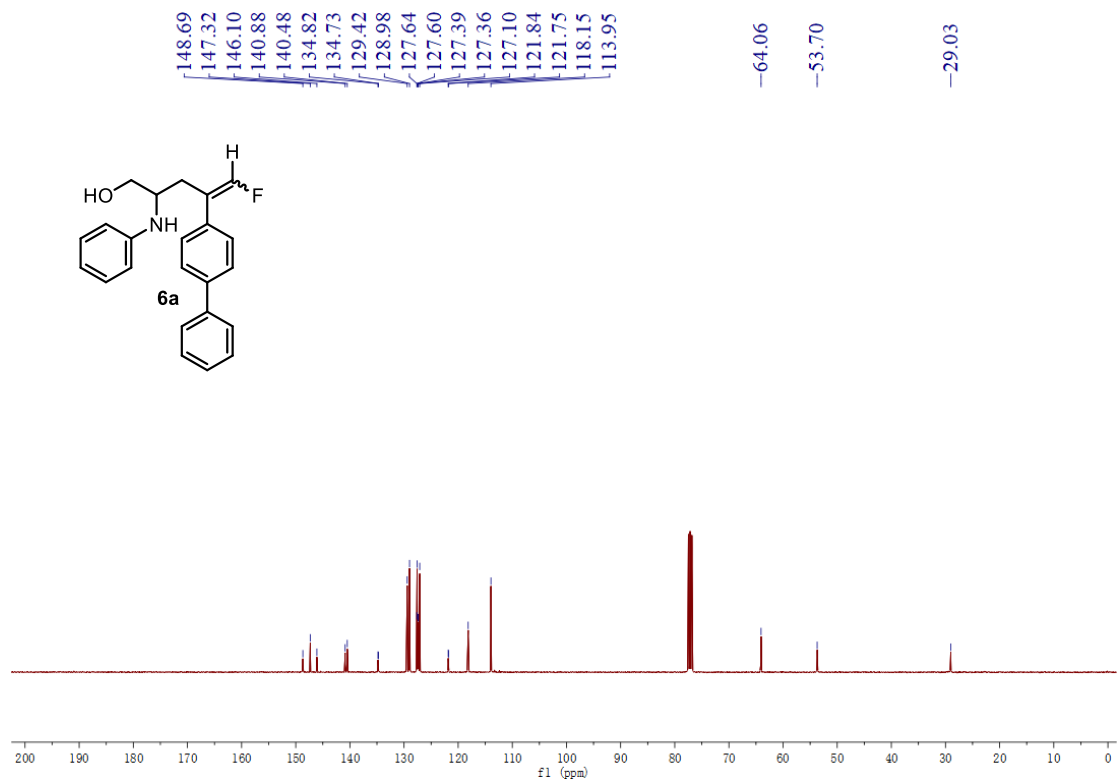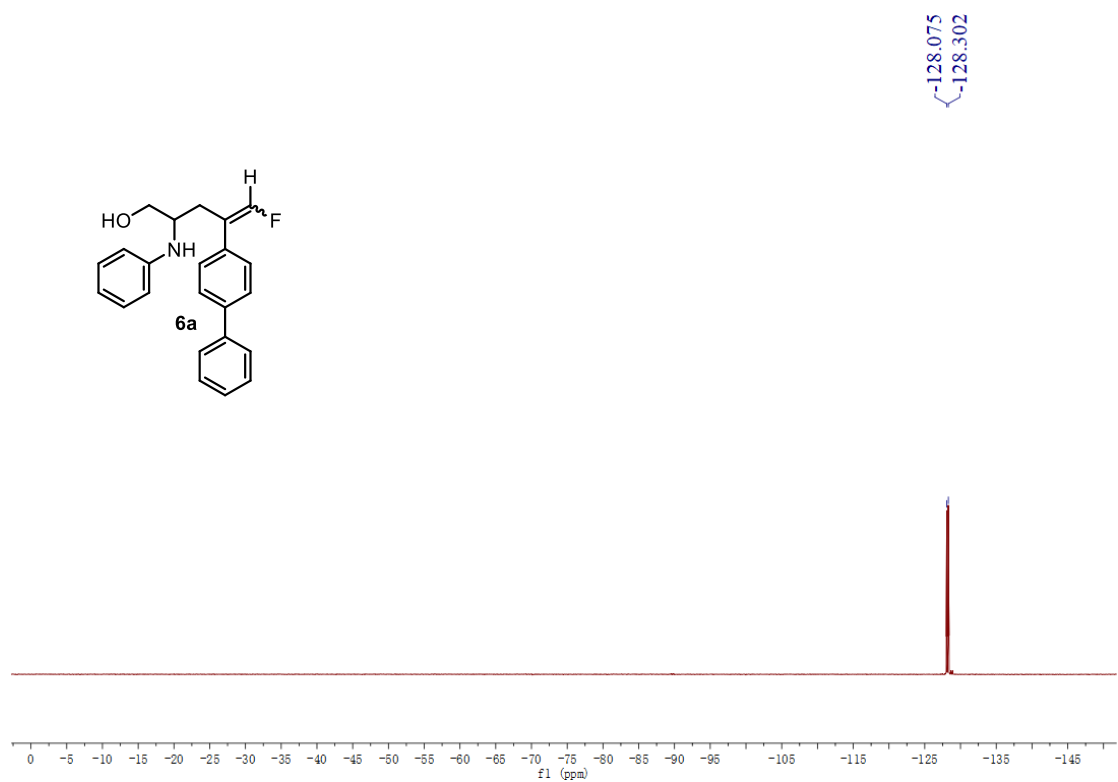

**$^1\text{H}$ ,  $^{13}\text{C}$  NMR and  $^{19}\text{F}$  spectra for compound 7a (Chloroform-d)**

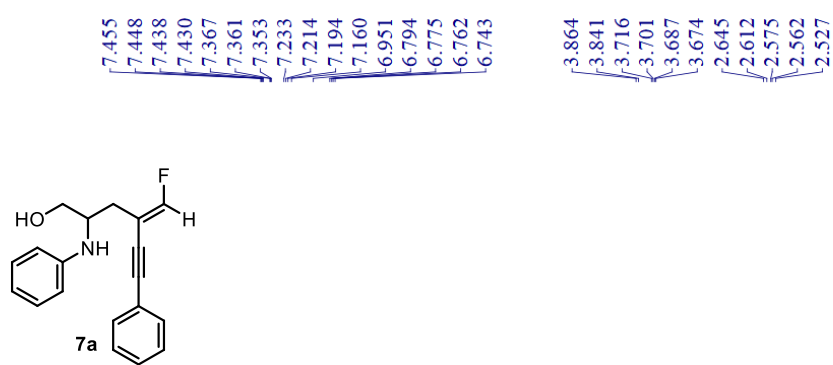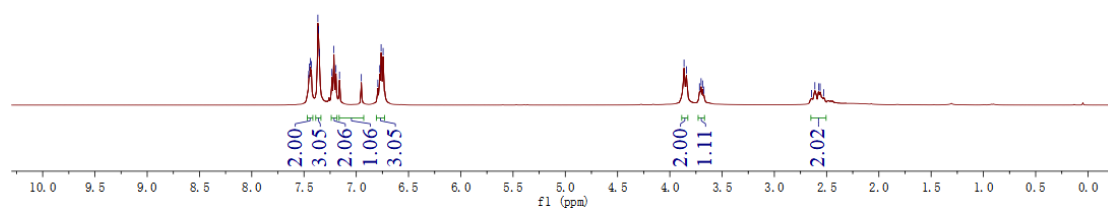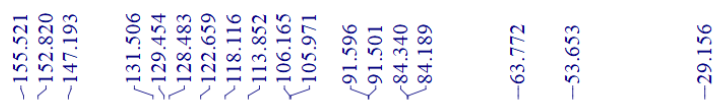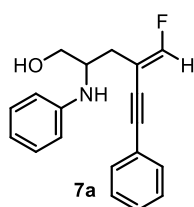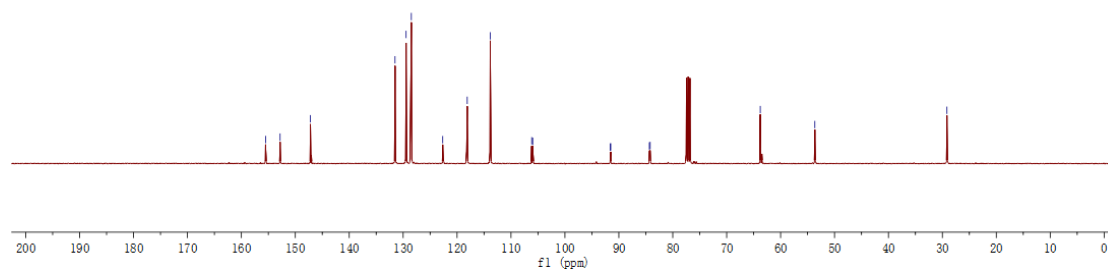

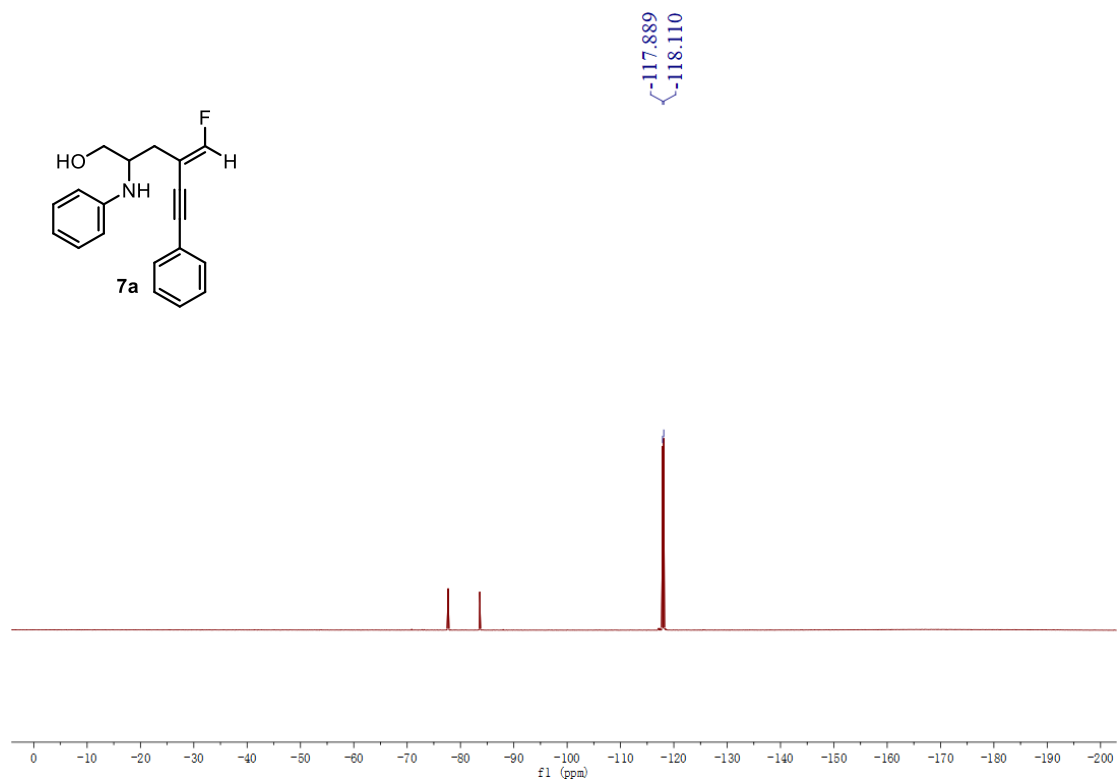

**<sup>1</sup>H, <sup>13</sup>C NMR and <sup>19</sup>F spectra for compound 7a' (Chloroform-d)**

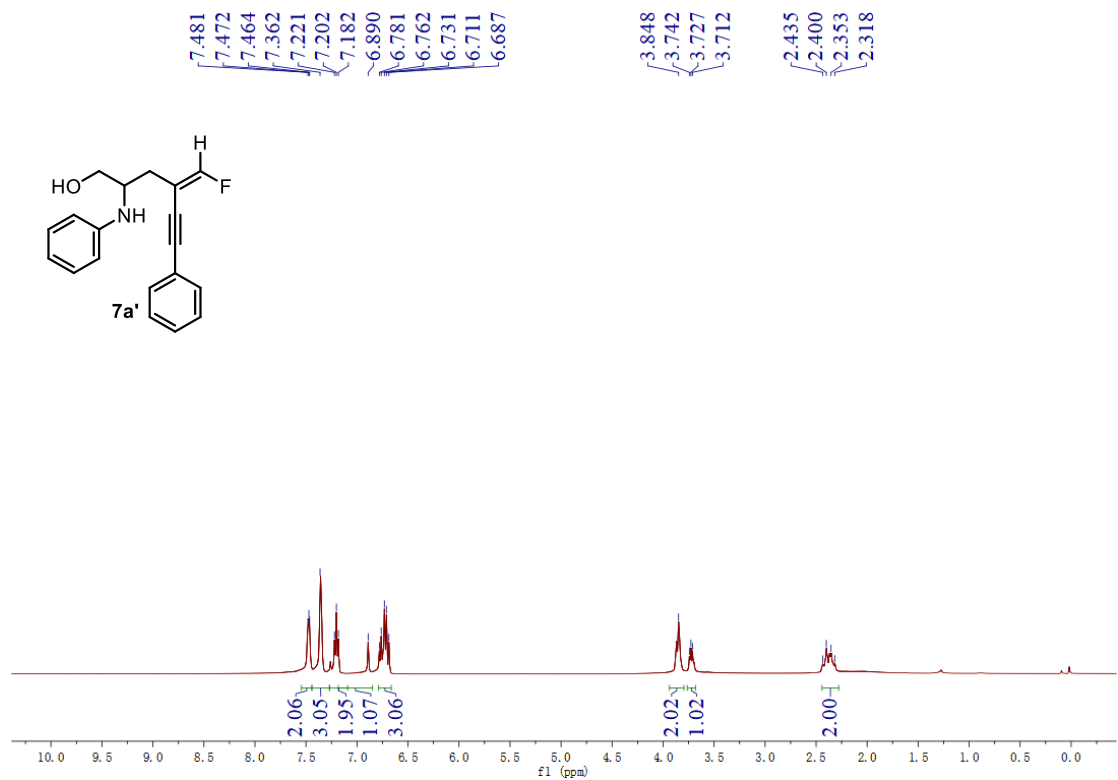

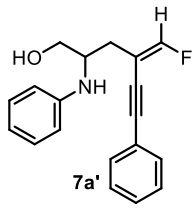

- ~154.137
- ~151.426
- ~147.032
- ~131.689
- ~129.577
- ~128.852
- ~128.519
- ~122.673
- ~118.316
- ~113.981
- ~103.927
- ~103.875
- ~96.965
- ~96.886
- ~82.266
- ~82.239
- ~63.240
- ~53.476
- ~31.272

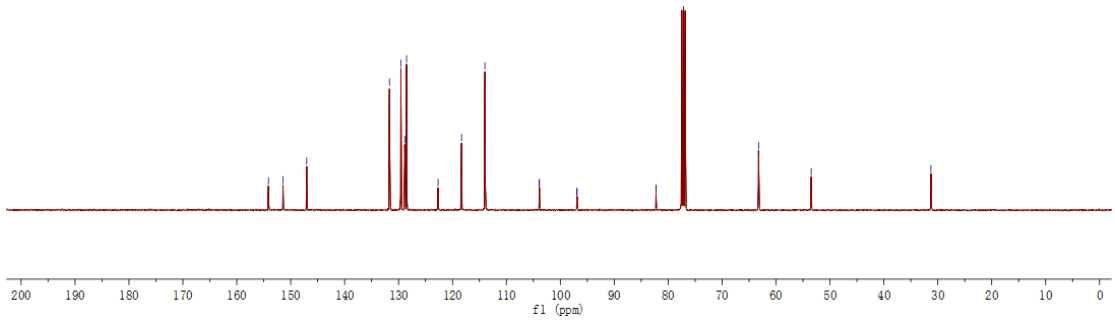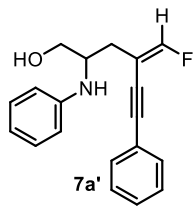

- ~113.443
- ~113.659

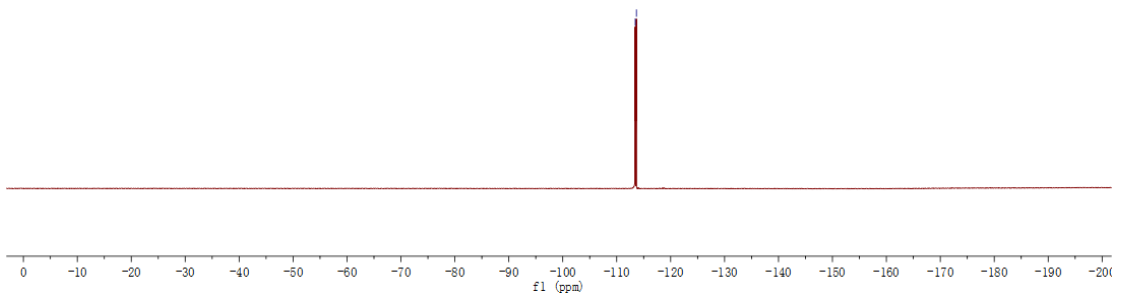

<sup>1</sup>H, <sup>13</sup>C NMR and <sup>19</sup>F spectra for compound 8 (Chloroform-d)

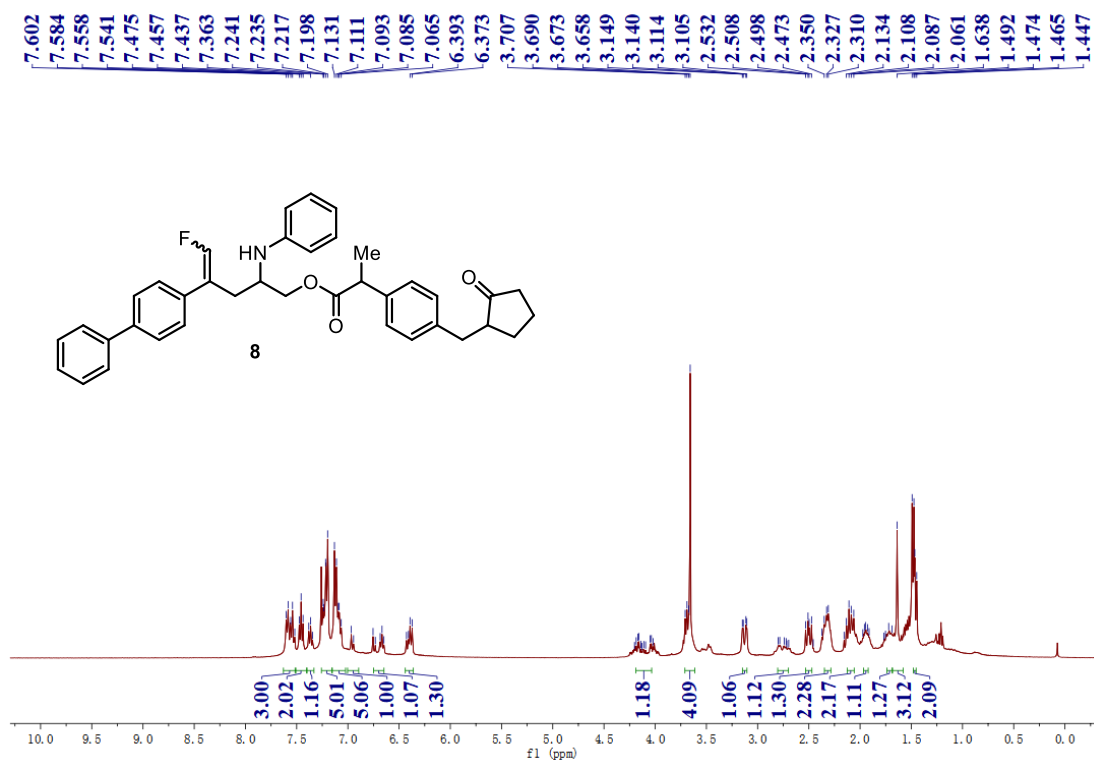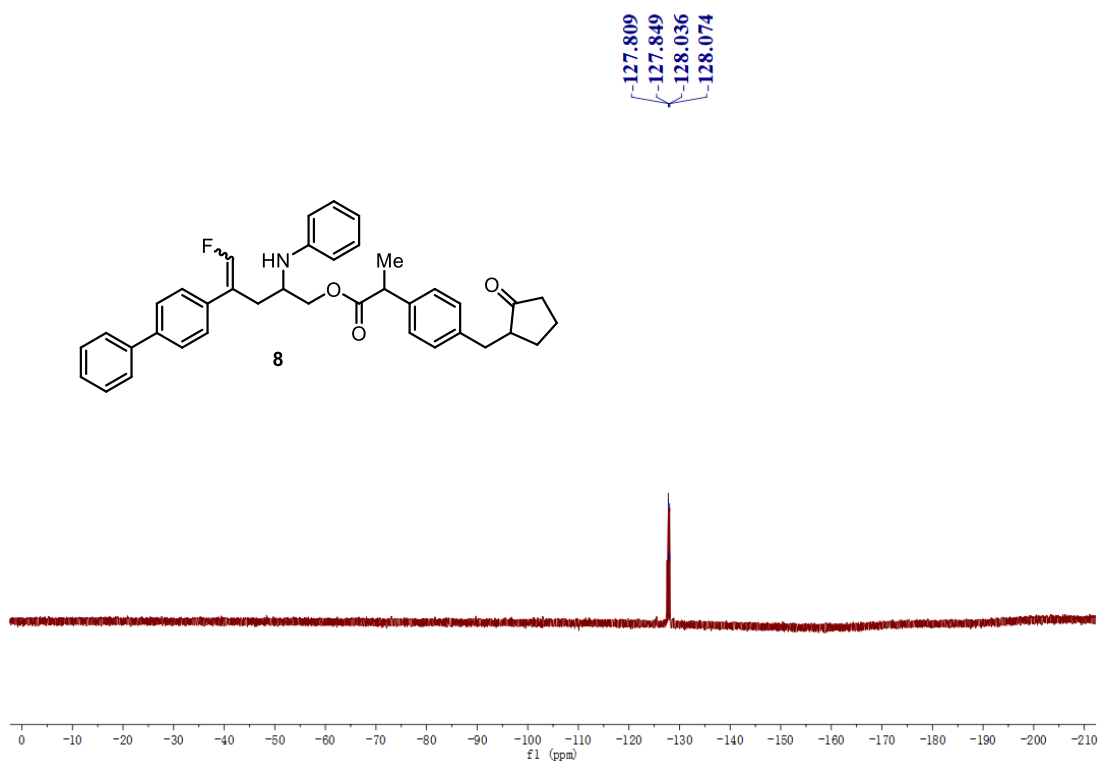



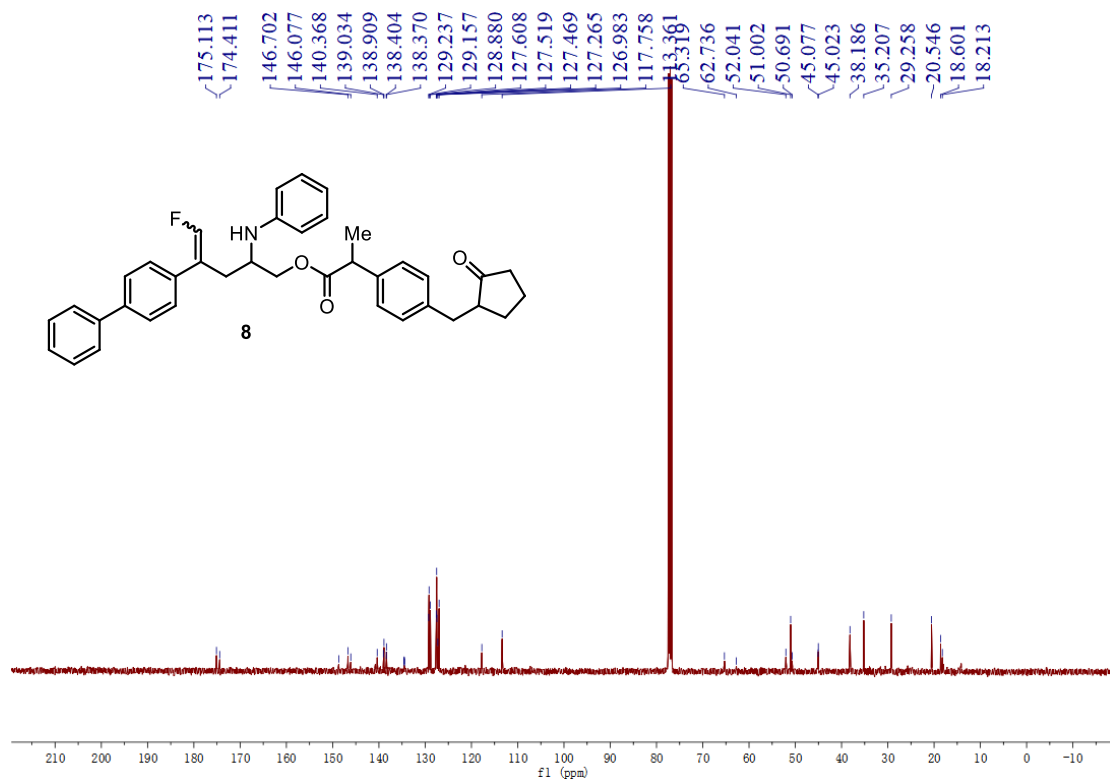

**<sup>1</sup>H, <sup>13</sup>C NMR and <sup>19</sup>F spectra for compound 9 (Chloroform-d)**

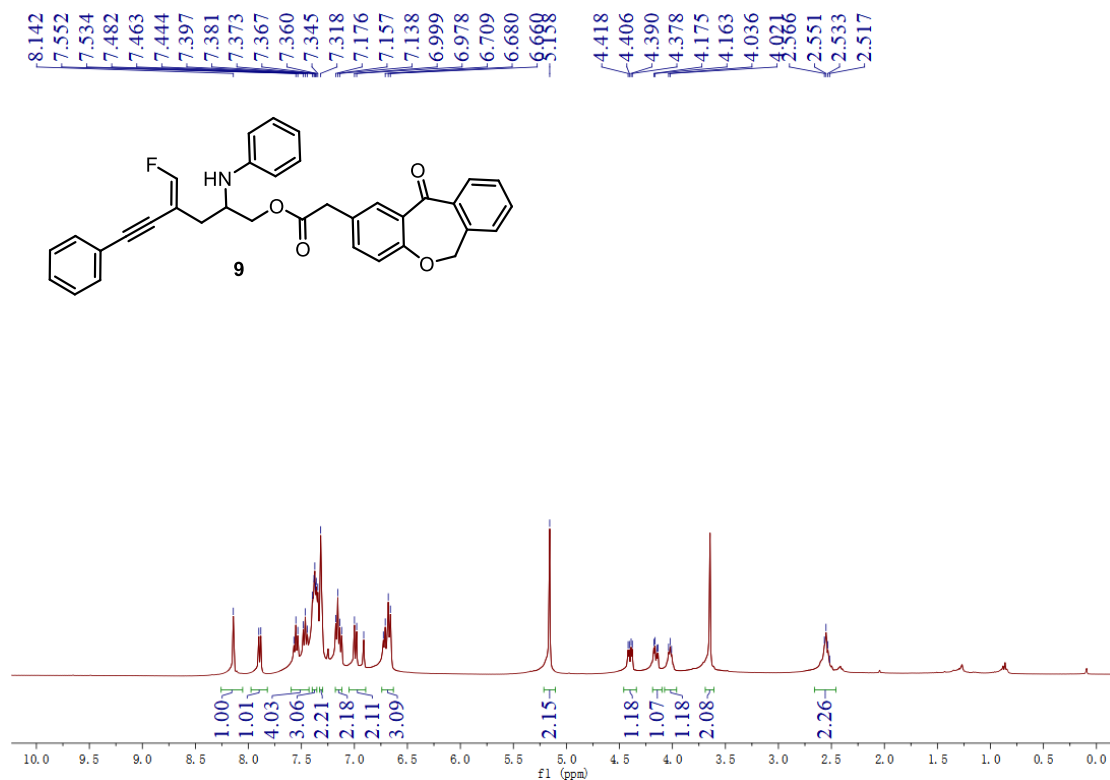

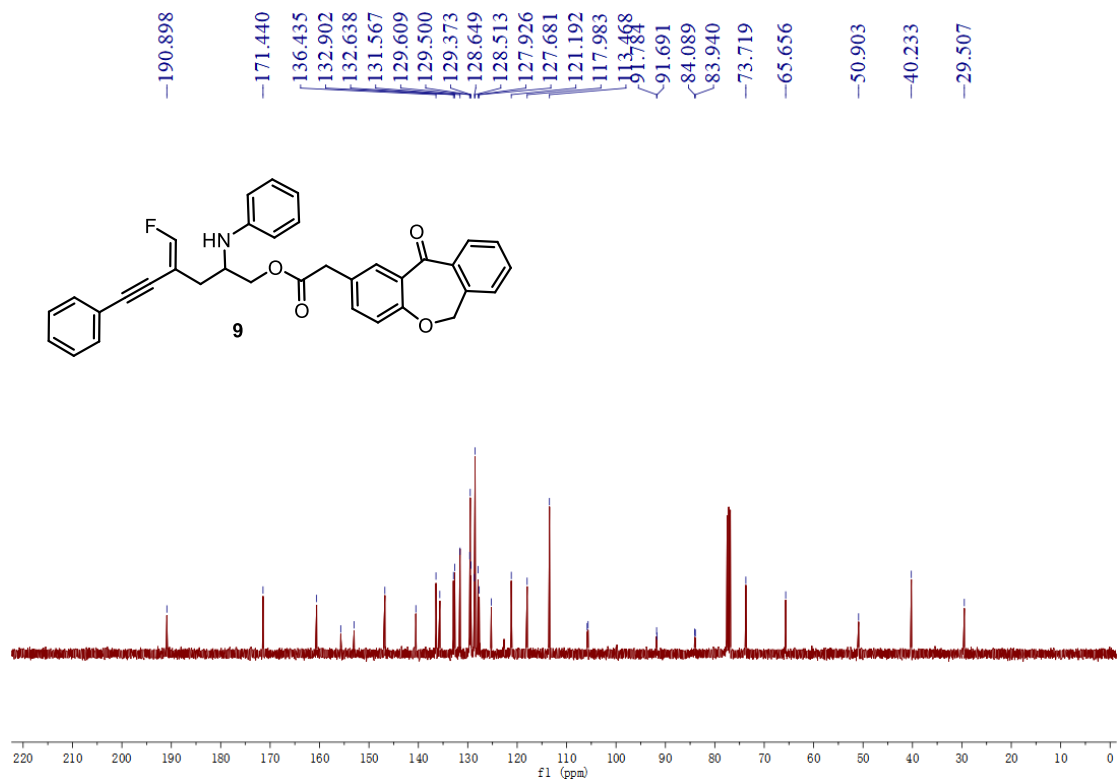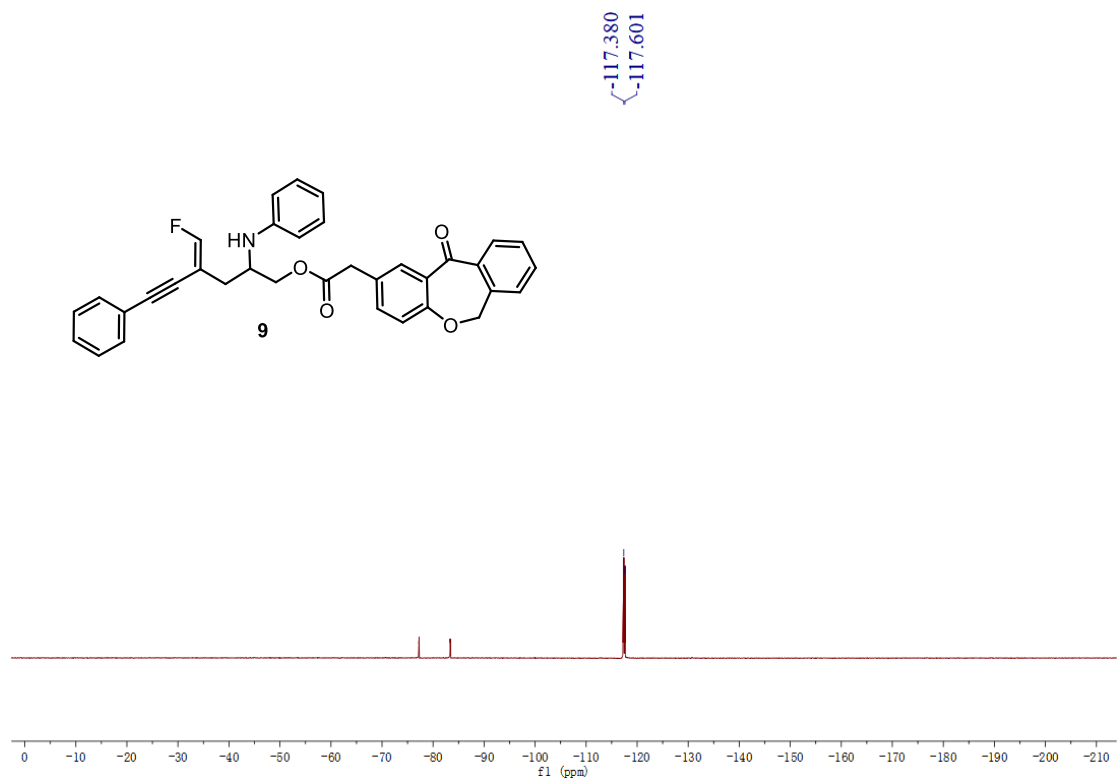

<sup>1</sup>H, <sup>13</sup>C NMR and <sup>19</sup>F spectra for compound 10 (Chloroform-d)

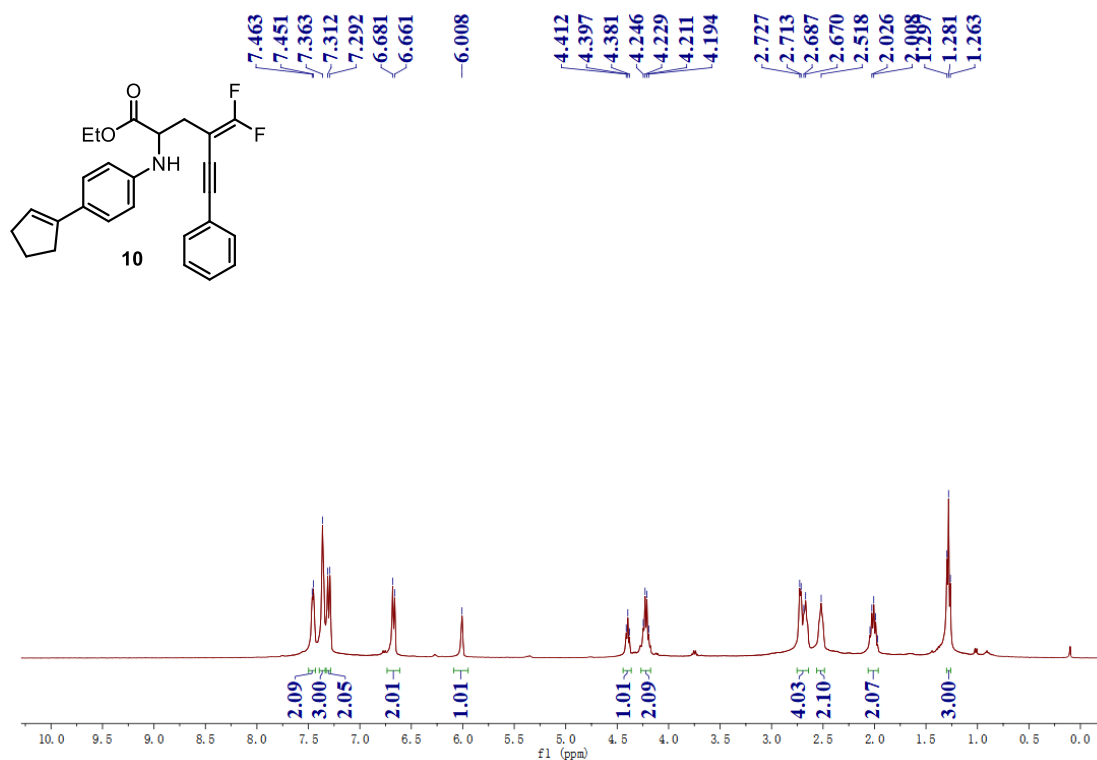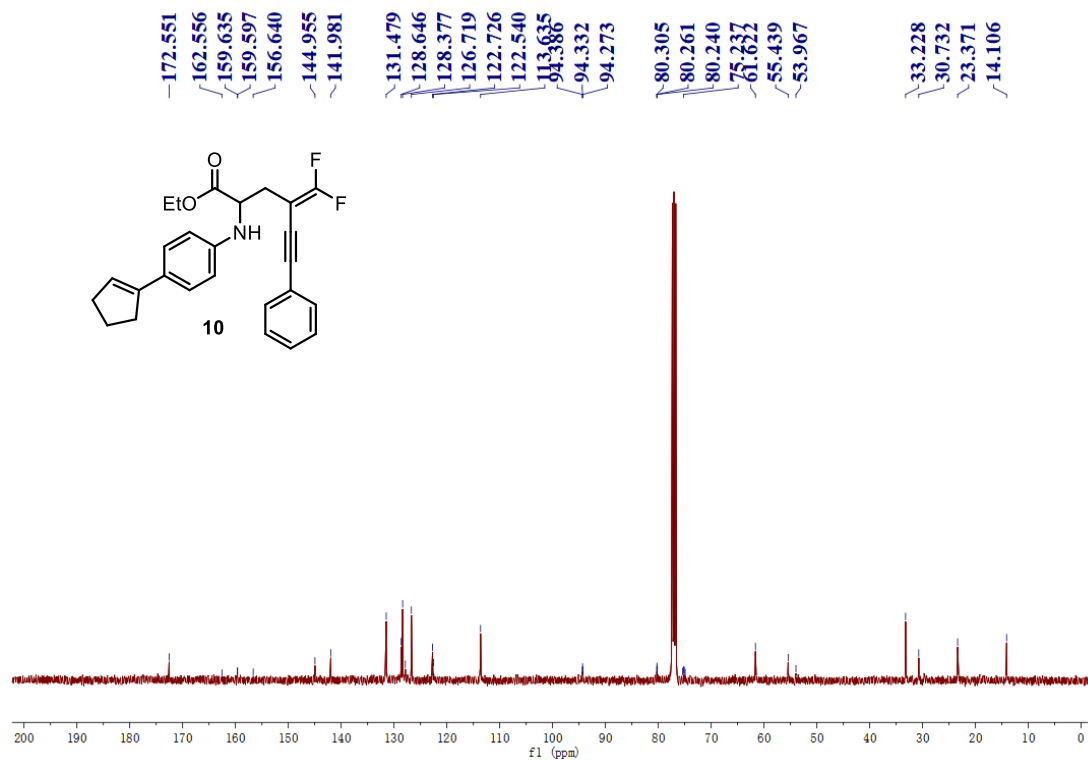

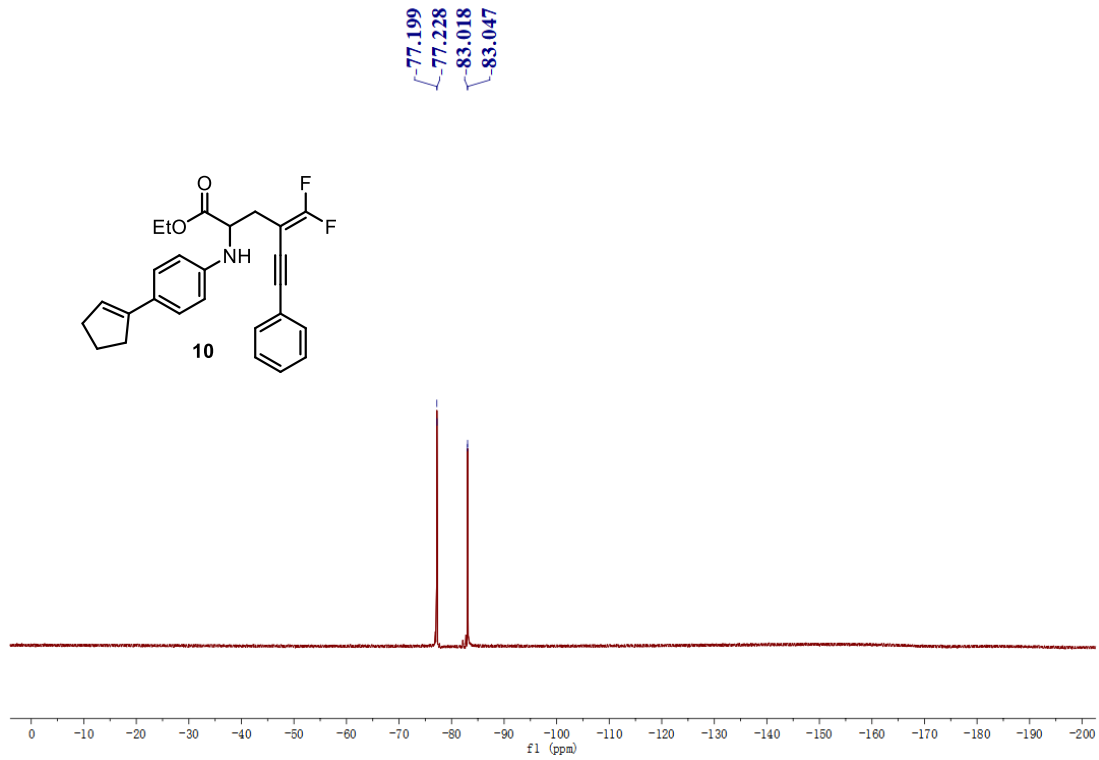

**$^1\text{H}$ ,  $^{13}\text{C}$  NMR and  $^{19}\text{F}$  spectra for compound 11 (Chloroform-d)**

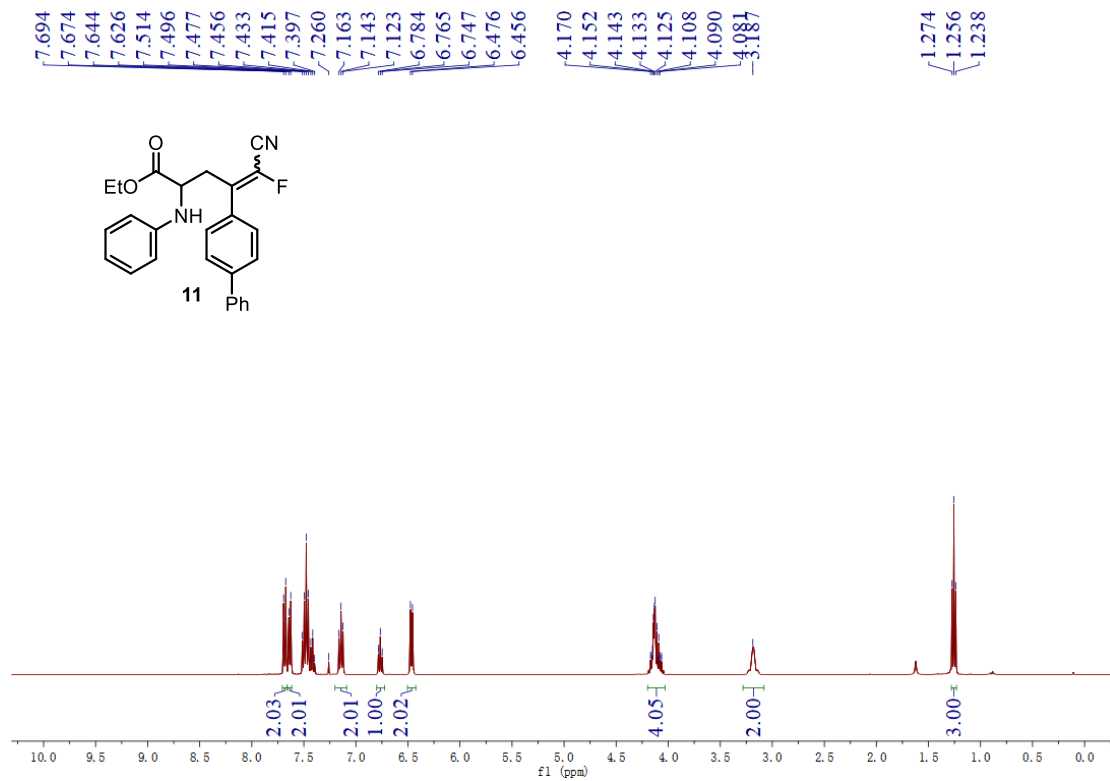

-172.204  
 -145.769  
 -143.118  
 -139.959  
 -136.252  
 -136.104  
 -132.371  
 -130.969  
 -130.937  
 -129.457  
 -129.082  
 -128.976  
 -128.117  
 -127.856  
 -127.244  
 -119.023  
 -113.832  
 -112.488  
 -112.020  
 -61.862  
 -54.750  
 -33.511  
 -14.206

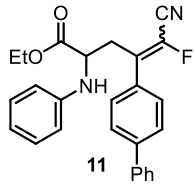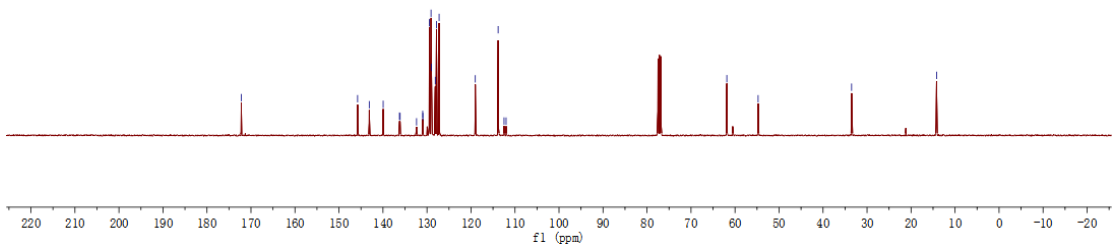

-121.630

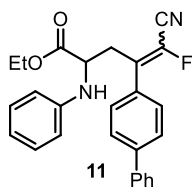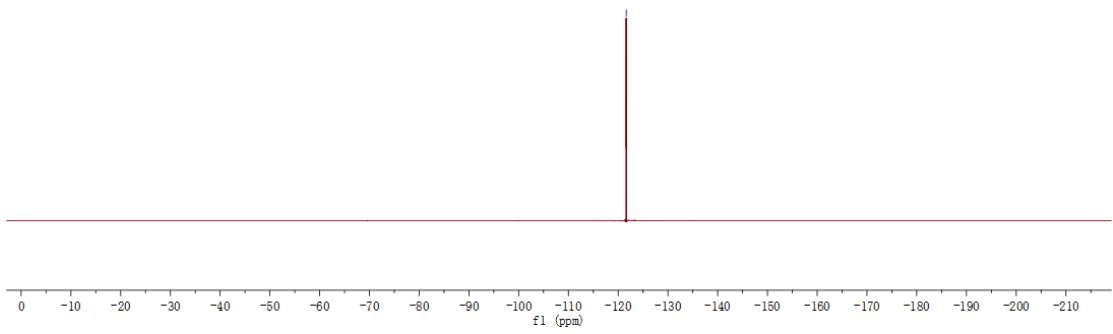

Supplement: d3gc01750h1.pdf [file d3gc01750h1.pdf]
